# Supplementary material
Source: publisher figshare collection journal article supplement (https://acs.figshare.com/ndownloader/files/22033872)

## *Supplementary Information*

# Increasing the Cytotoxicity of Ru(II) Polypyridyl Complexes by tuning the Electronic Structure of Dioxo Ligands

*Anna Notaro,<sup>a</sup> Marta Jakubaszek,<sup>a,b</sup> Nils Rotthowe,<sup>c</sup> Federica Maschietto,<sup>d</sup> Robin Vinck,<sup>a</sup> Patrick S. Felder,<sup>a</sup> Bruno Goud,<sup>b</sup> Mickaël Tharaud,<sup>e</sup> Ilaria Ciofini,<sup>d</sup> Fethi Bedioui,<sup>f</sup> Rainer F. Winter,<sup>c</sup> and Gilles Gasser<sup>a,\*</sup>*

<sup>a</sup> Chimie ParisTech, PSL University, CNRS, Institute of Chemistry for Life and Health Sciences, Laboratory for Inorganic Chemical Biology, F-75005 Paris, France.

<sup>b</sup> Institut Curie, PSL University, CNRS UMR 144, Paris, France.

<sup>c</sup> Department of Chemistry, University of Konstanz, Universitätsstrasse 10, D-78457 Konstanz, Germany.

<sup>d</sup> Chimie ParisTech, PSL University, CNRS, Institute of Chemistry for Life and Health Sciences, Chemical Theory and Modelling Group, F-75005 Paris, France.

<sup>e</sup> Université de Paris, Institut de physique du globe de Paris, CNRS, F-75005 Paris, France.

<sup>f</sup> Chimie ParisTech, PSL University, CNRS, Institute of Chemistry for Life and Health Sciences, Team Synthèse, Electrochimie, Imagerie et Systèmes Analytiques pour le Diagnostic, F-75005 Paris, France.

\* Corresponding author: E-mail: [gilles.gasser@chimeparistech.psl.eu](mailto:gilles.gasser@chimeparistech.psl.eu); WWW: [www.gassergroup.com](http://www.gassergroup.com);  
Phone: +33 1 44 27 56 02

## Table of Contents

|     |                                                                                                                                                                    |     |
|-----|--------------------------------------------------------------------------------------------------------------------------------------------------------------------|-----|
| 1)  | Table S1. UV/Vis/NIR absorptions of the complexes in their native and electrochemically generated states in DMF.                                                   | S3  |
| 2)  | Figure S1. NMR spectra of complexes <b>1-6</b> .....                                                                                                               | S3  |
| 3)  | Figure S2. HPLC traces at 450 nm of complexes <b>1-6</b> .....                                                                                                     | S16 |
| 4)  | Figure S3. EPR spectra of a) <b>1</b> , b) <b>2</b> , c) <b>3</b> and d) <b>4</b> at -40 °C and -140 °C and e) <b>6ox</b> at -140 °C                               | S18 |
| 5)  | Table S2. Computed and Experimental g-Tensors.....                                                                                                                 | S19 |
| 6)  | Figure S4. Voltammograms recorded by CV and with the use of RDE for complexes <b>2-6</b> .....                                                                     | S20 |
| 7)  | Table S3. Electrochemical data for complexes <b>1-4</b> .....                                                                                                      | S25 |
| 8)  | Figure S5. UV/Vis/NIR-spectroelectrochemistry data for complex <b>1</b> in the presence of the reducing agent glutathione.                                         | S26 |
| 9)  | Table S4. Electrochemical data for complexes <b>5</b> and <b>6</b> .....                                                                                           | S27 |
| 10) | Figure S6. Overlap of <sup>1</sup> H spectra of complexes <b>1-6</b> in DMSO over 96 h.....                                                                        | S28 |
| 11) | Figure S7. Percentage concentration of complex <b>1</b> in human plasma, normalized with respect to the internal standard (caffeine) and plotted against time..... | S34 |
| 12) | Figure S8. Fluorometric cell viability assay.....                                                                                                                  | S35 |
| 13) | Table S5. IC <sub>50</sub> values for 3-methoxycatechol, 3-methylcatechol, 4-methylcatechol, 4-tertbutylcatechol, tetrabromocatechol and 4-nitrocatechol.          | S57 |
| 14) | Figure S9. CellTiter Glo® viability Test.....                                                                                                                      | S58 |
| 15) | Figure S10. Cell Death Mechanism.....                                                                                                                              | S59 |
| 16) | Figure S11. Cellular uptake mechanism of complex <b>1</b> .....                                                                                                    | S61 |
| 17) | Figure S12. Oxygen consumption rates and different respiration parameters in HeLa cells alone or after treatment with various test compounds.....                  | S62 |
| 18) | Figure S13. Extracellular acidification rate and different parameters during glycolysis in HeLa cells alone or after treatment with various test compounds.....    | S63 |
| 19) | Figure S14. Fuel flex assay in HeLa cells.....                                                                                                                     | S64 |

**1) Table S1.** UV/Vis/NIR absorptions of the complexes in their native and electrochemically generated states in DMF.

| compound | oxidation state | $\lambda_{\text{max}}$         |
|----------|-----------------|--------------------------------|
| <b>1</b> | 0               | 810(br)<br>650<br>535          |
|          | 1+              | 885<br>510, 470                |
|          | 2+              | 675<br>405(sh)<br>350(sh)      |
| <b>2</b> | 0               | 810(br)<br>655<br>535          |
|          | 1+              | 890<br>520, 470                |
|          | 2+              | 675<br>405(sh)<br>350(sh)      |
| <b>3</b> | 1+              | 900<br>525, 490                |
| <b>4</b> | 1+              | 895<br>525, 480                |
| <b>5</b> | 0               | 675(sh)<br>600, 505<br>345(sh) |
|          | 1+              | 985-845<br>465, 410            |
|          | 2 <sup>a</sup>  | 430 (sh), 390                  |
| <b>6</b> | 0               | 675(sh)<br>590, 510(sh)<br>375 |

Electrochemically generated species in DMF / 0.1M NBu<sub>4</sub>PF<sub>6</sub>,

<sup>a</sup> irreversible

**2) Figure S1.** NMR spectra of complexes **1-6**.

(**1**),  $^1\text{H}$ ,  $\text{CD}_2\text{Cl}_2$ , 500 MHz

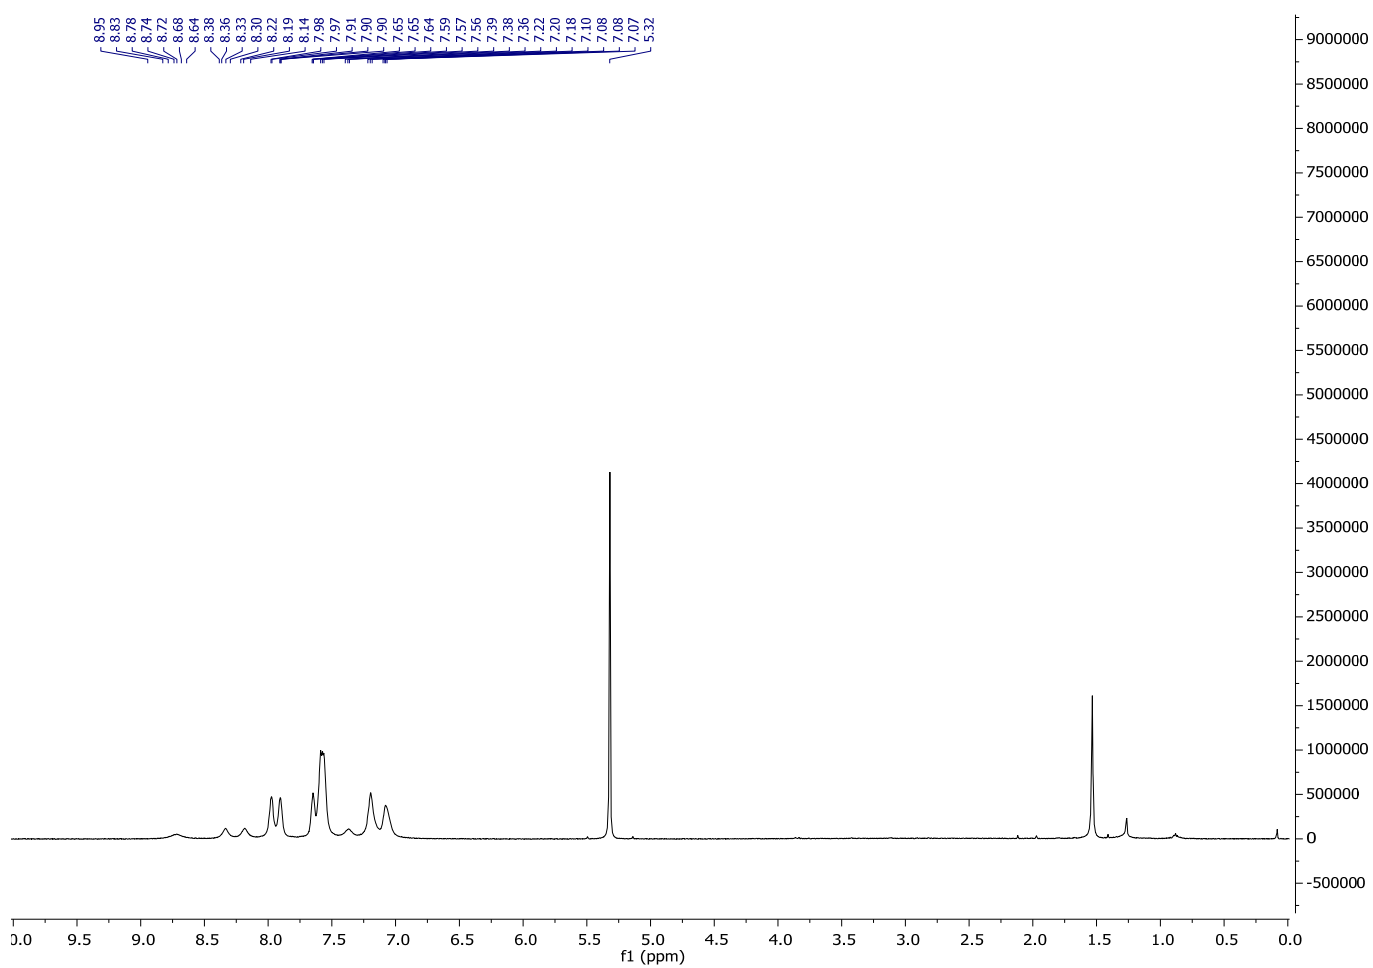

(2),  $^1\text{H}$ ,  $\text{CD}_2\text{Cl}_2$ , 400 MHz

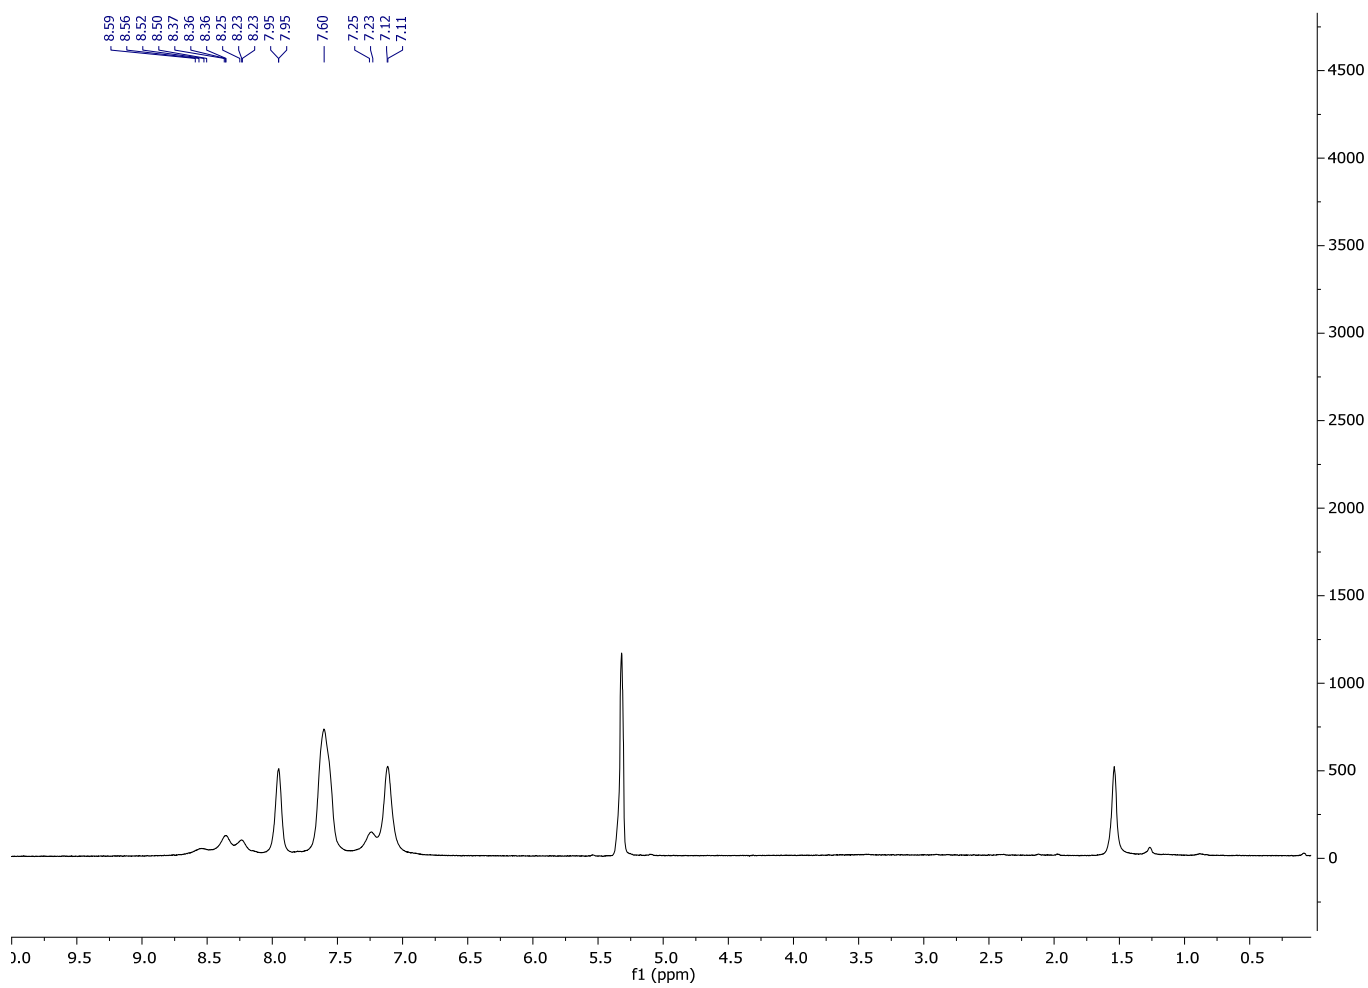

(3),  $^1\text{H}$ ,  $\text{CD}_2\text{Cl}_2$ , 500 MHz

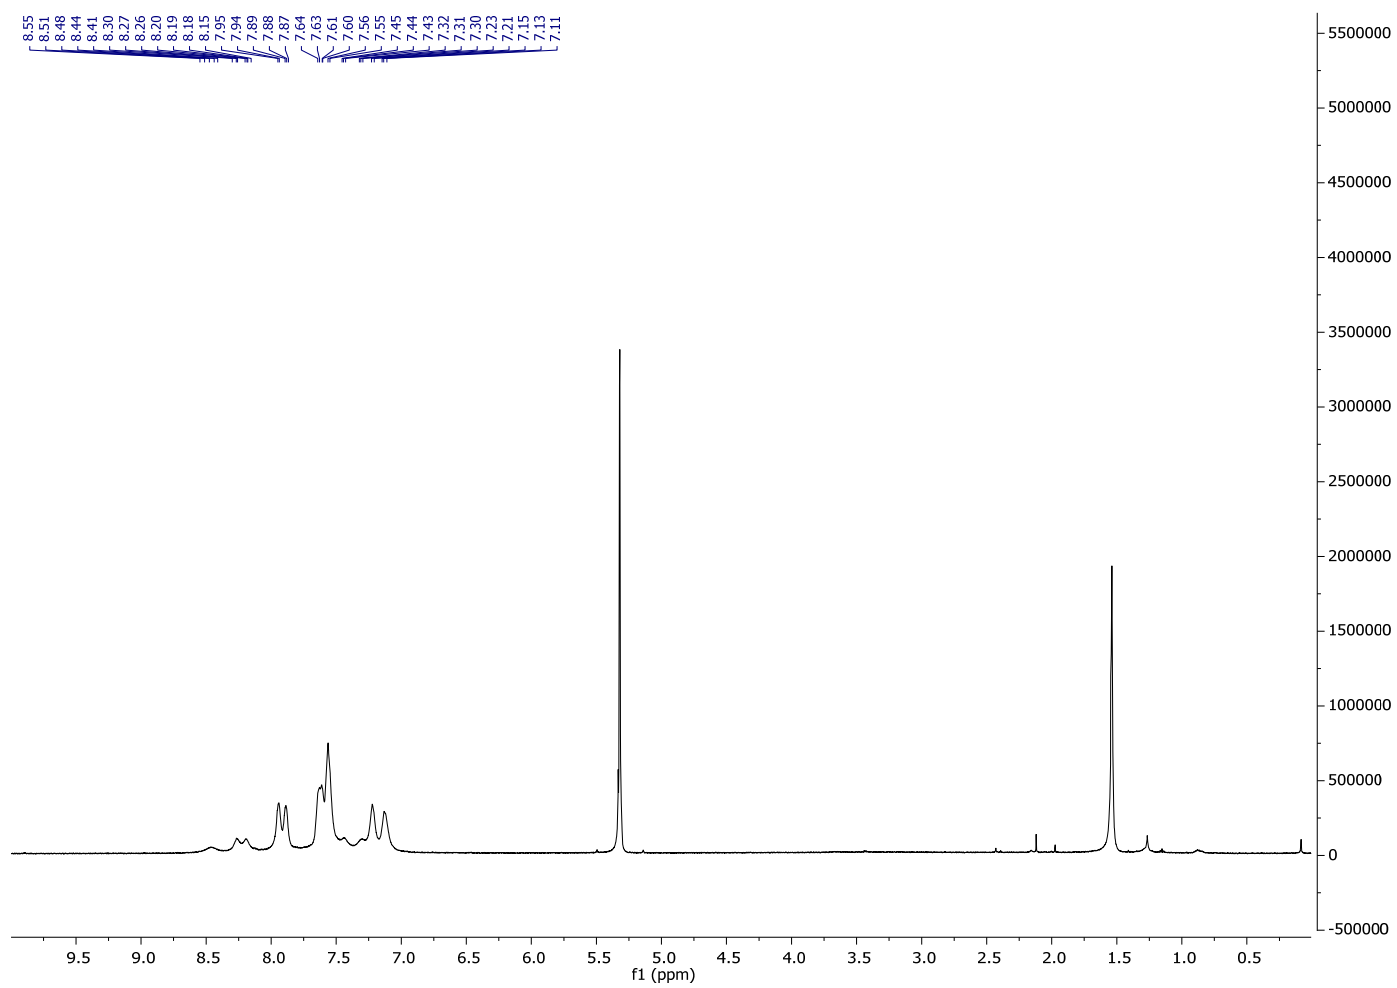

(4),  $^1\text{H}$ ,  $\text{CD}_2\text{Cl}_2$ , 500 MHz

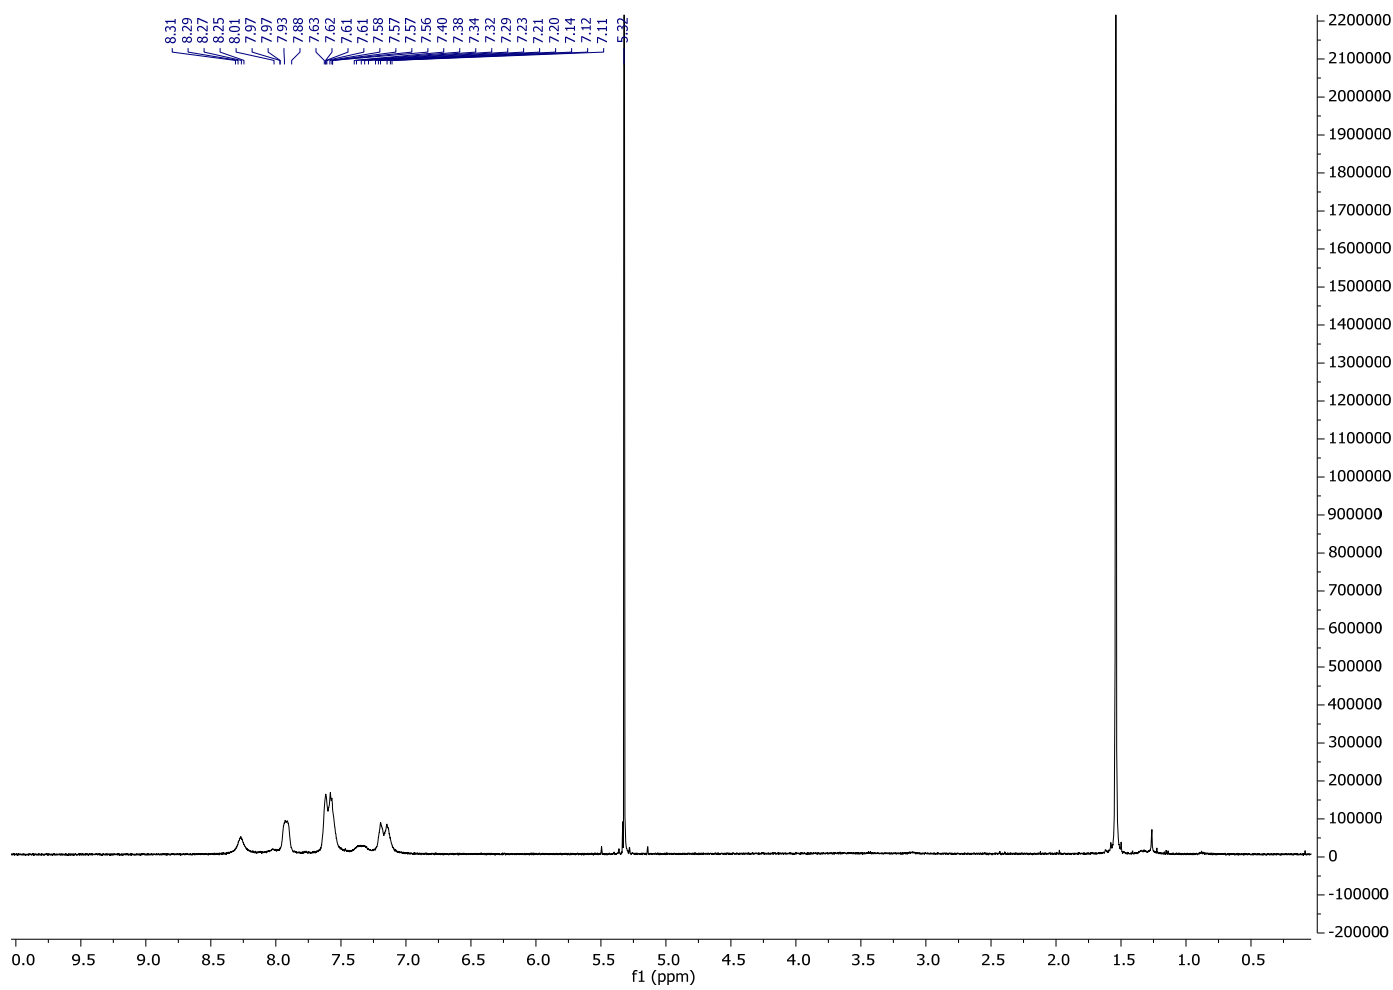

(5),  $^1\text{H}$ ,  $\text{CD}_2\text{Cl}_2$ , 400 MHz

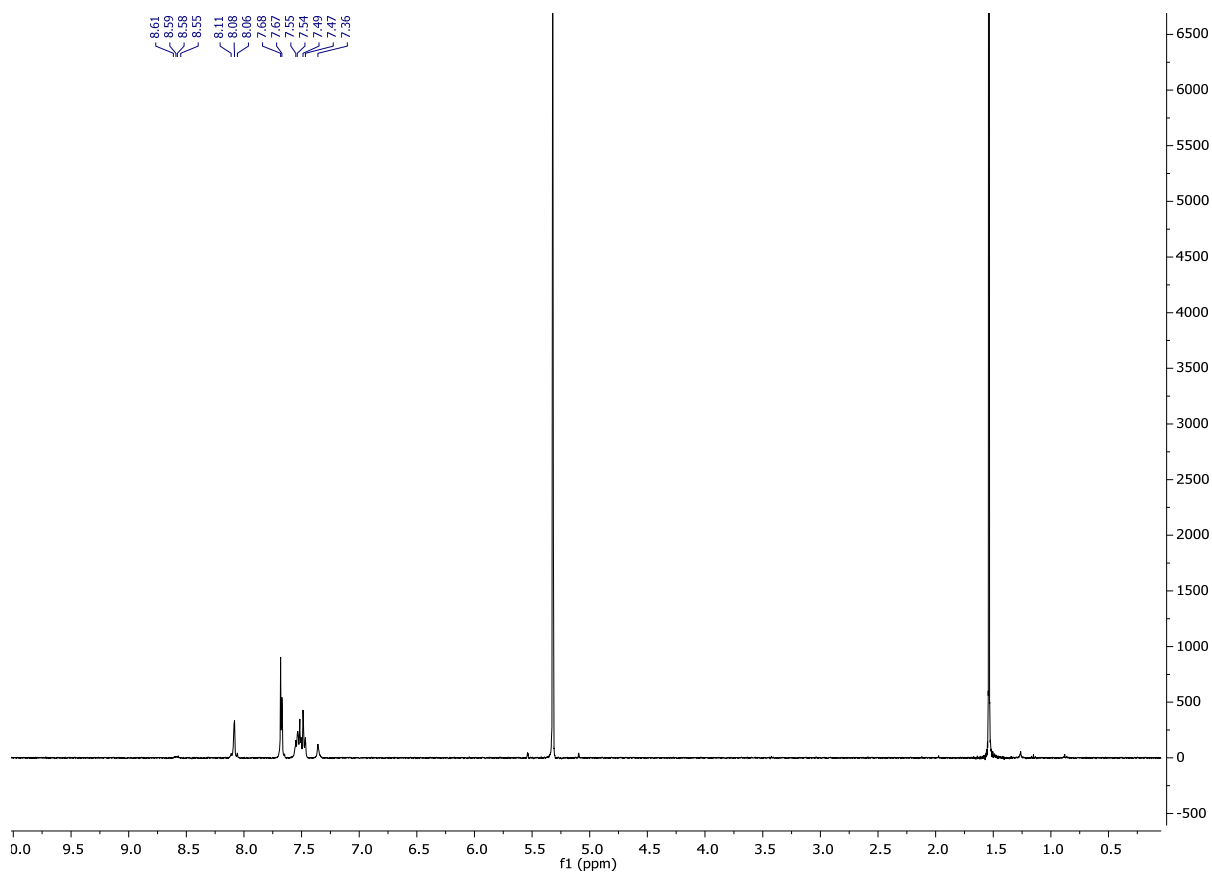

$^1\text{H}$ ,  $\text{CD}_2\text{Cl}_2$ , 400 MHz containing elemental Zinc

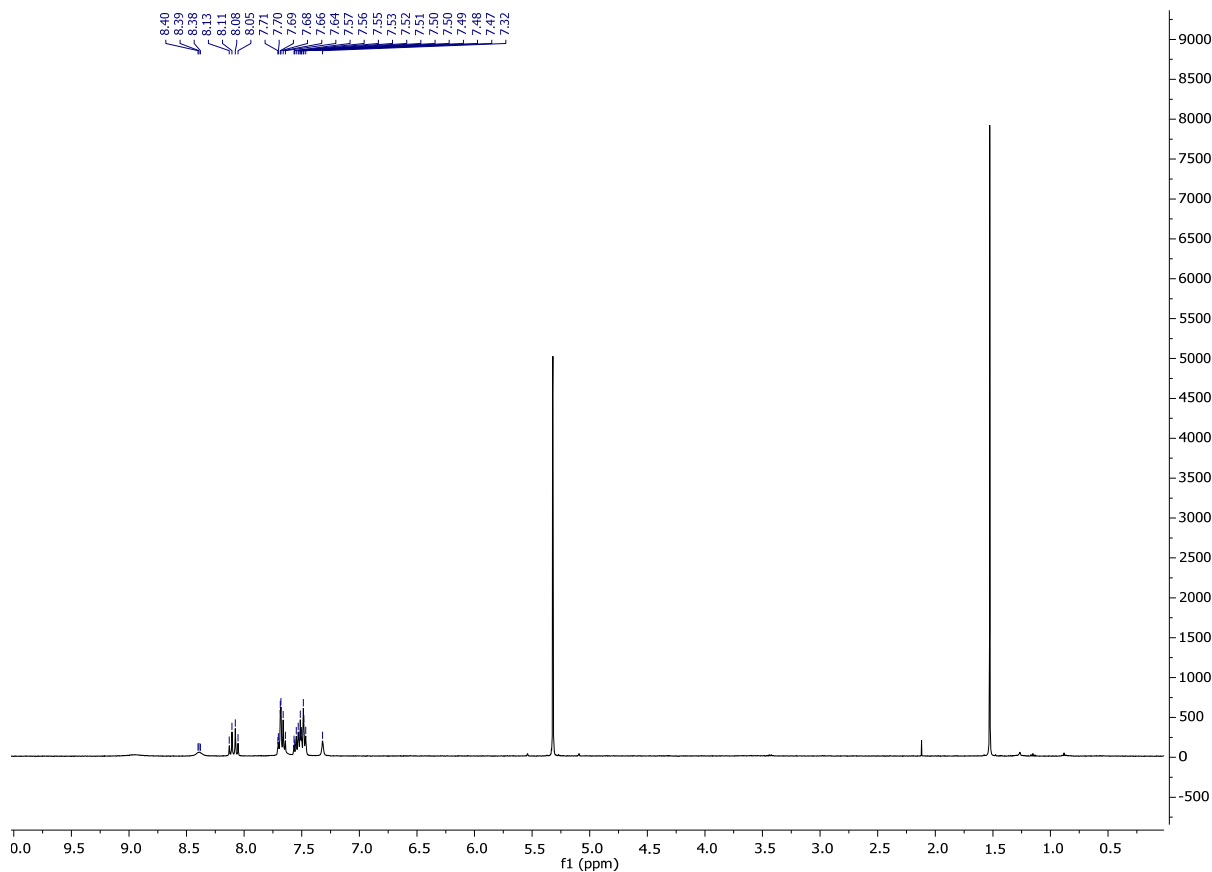



(6),  $^1\text{H}$ ,  $\text{CD}_2\text{Cl}_2$ , 400 MHz

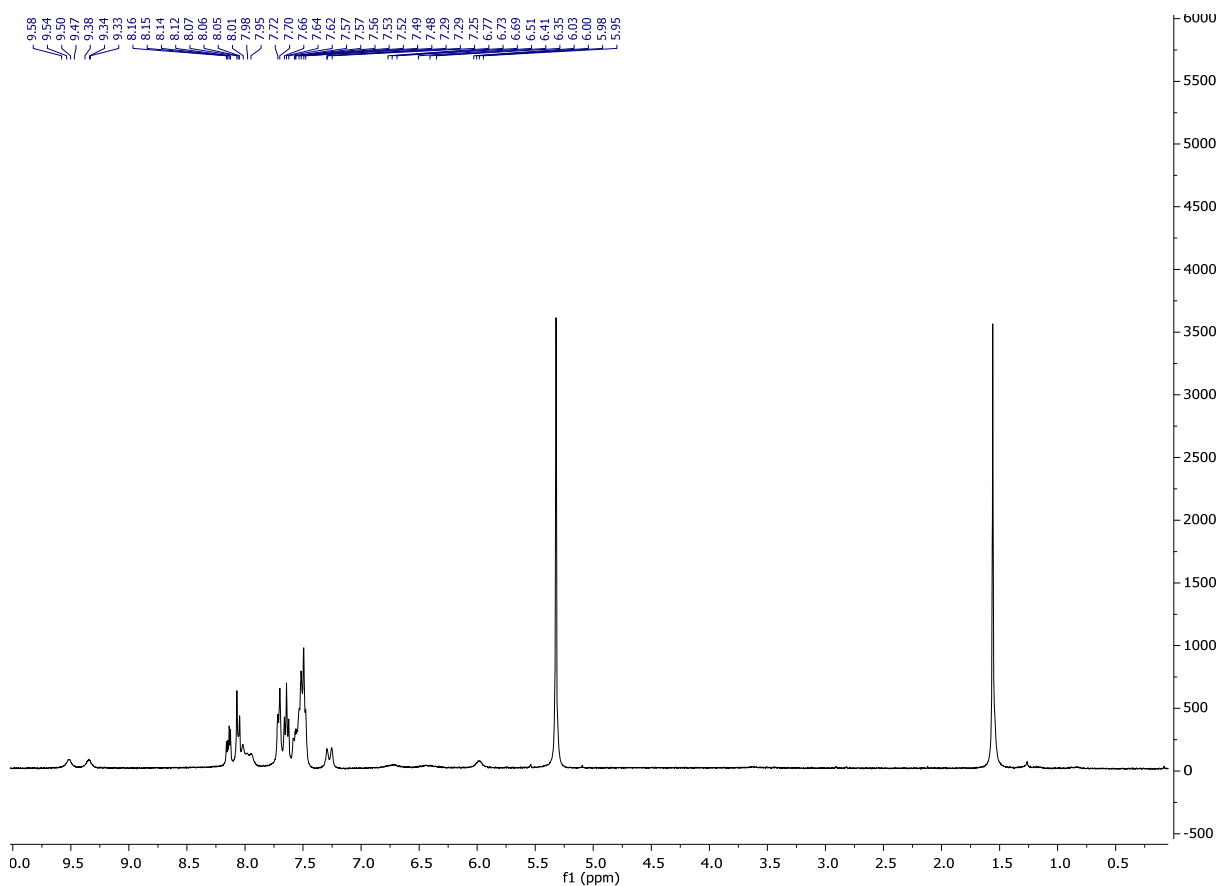

$^1\text{H}$ ,  $\text{CD}_2\text{Cl}_2$ , 400 MHz containing elemental Zinc

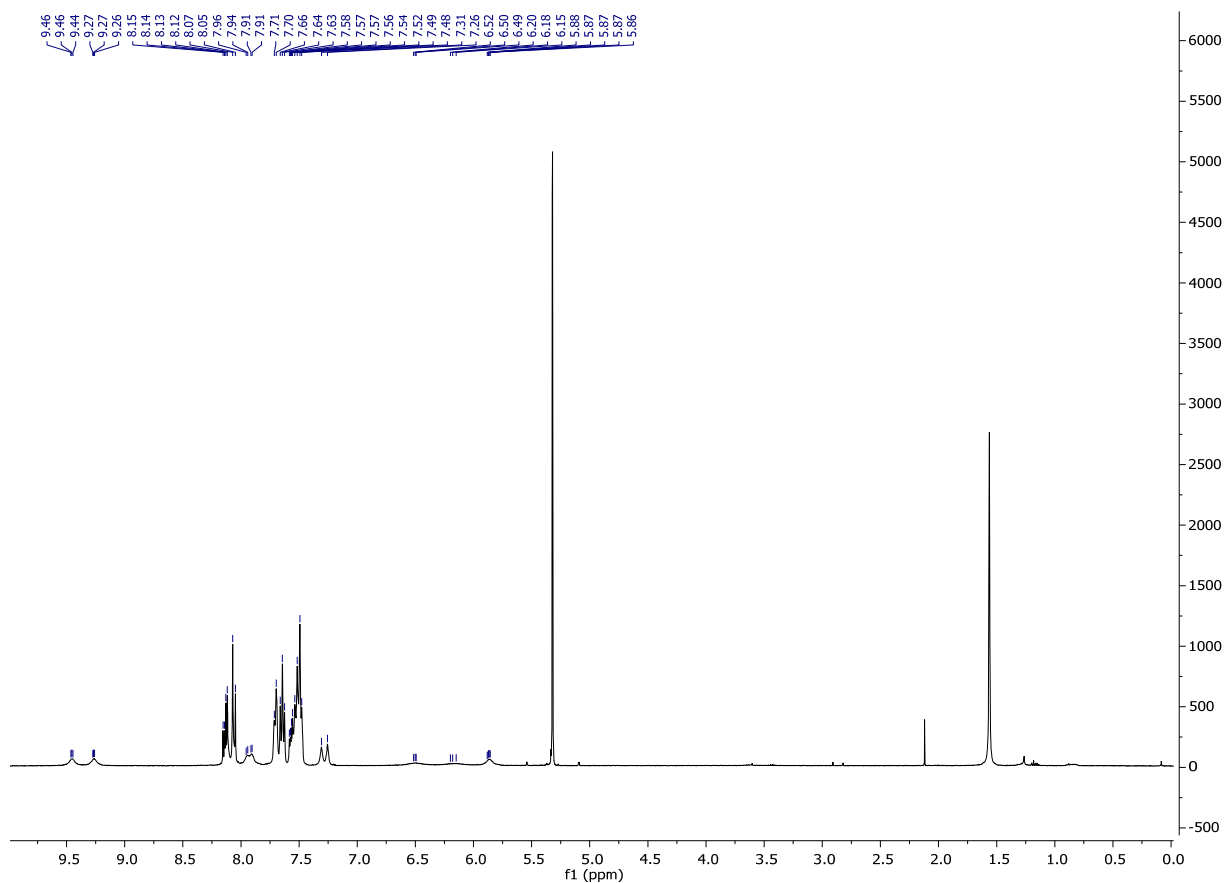

(1),  $^{13}\text{C}$ ,  $\text{CD}_2\text{Cl}_2$ , 125 MHz

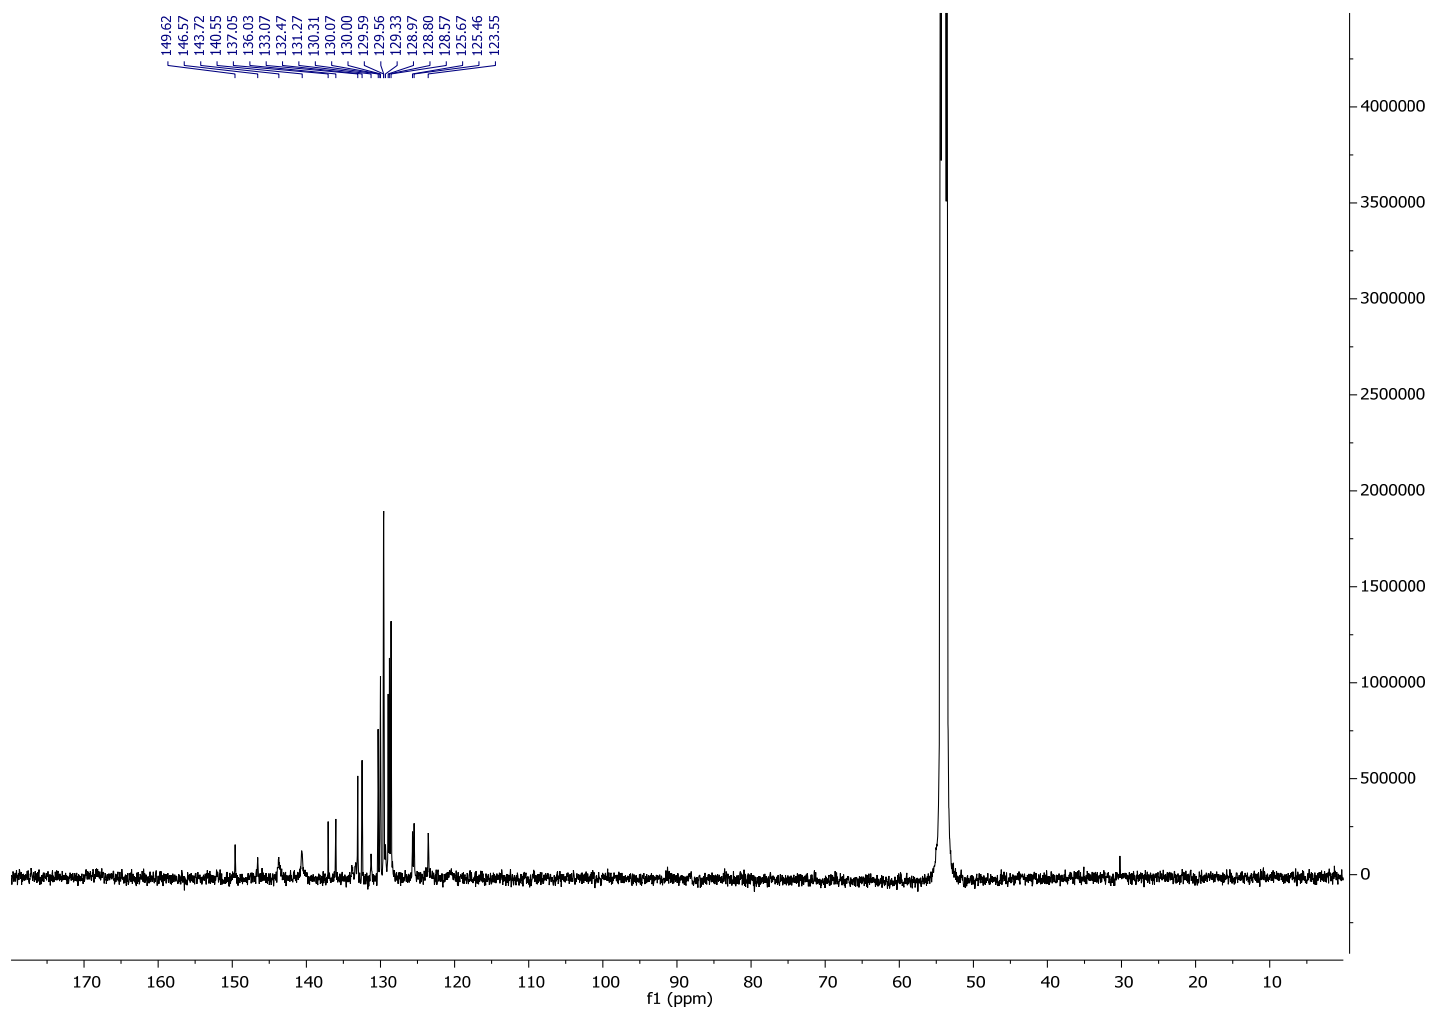

(2),  $^{13}\text{C}$ ,  $\text{CD}_2\text{Cl}_2$ , 125 MHz

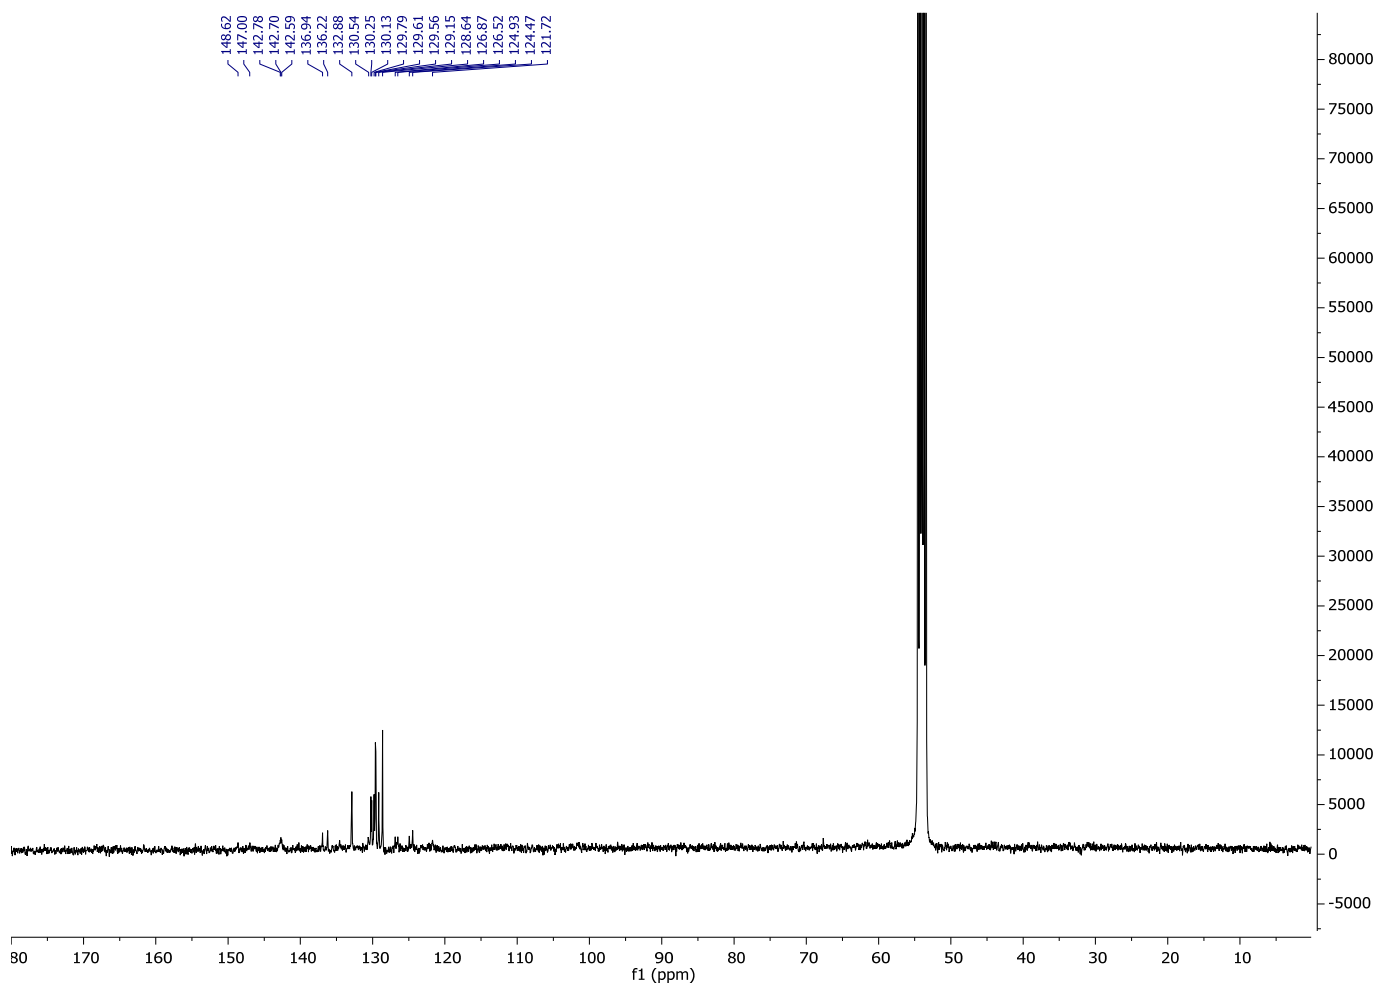

(3),  $^{13}\text{C}$ ,  $\text{CD}_2\text{Cl}_2$ , 125 MHz

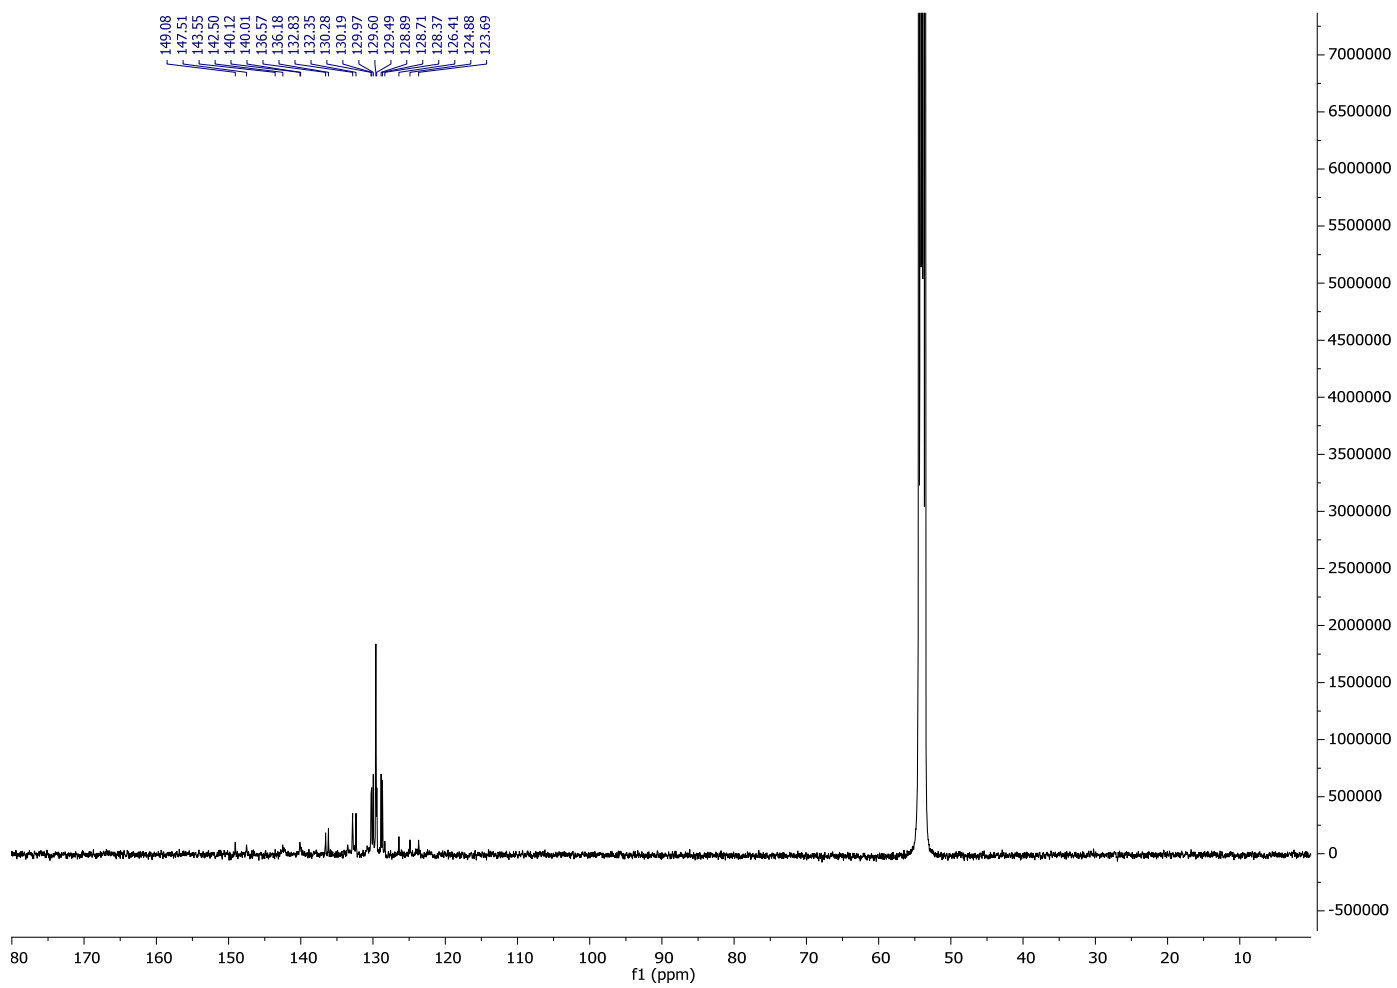

(4),  $^{13}\text{C}$ ,  $\text{CD}_2\text{Cl}_2$ , 125 MHz

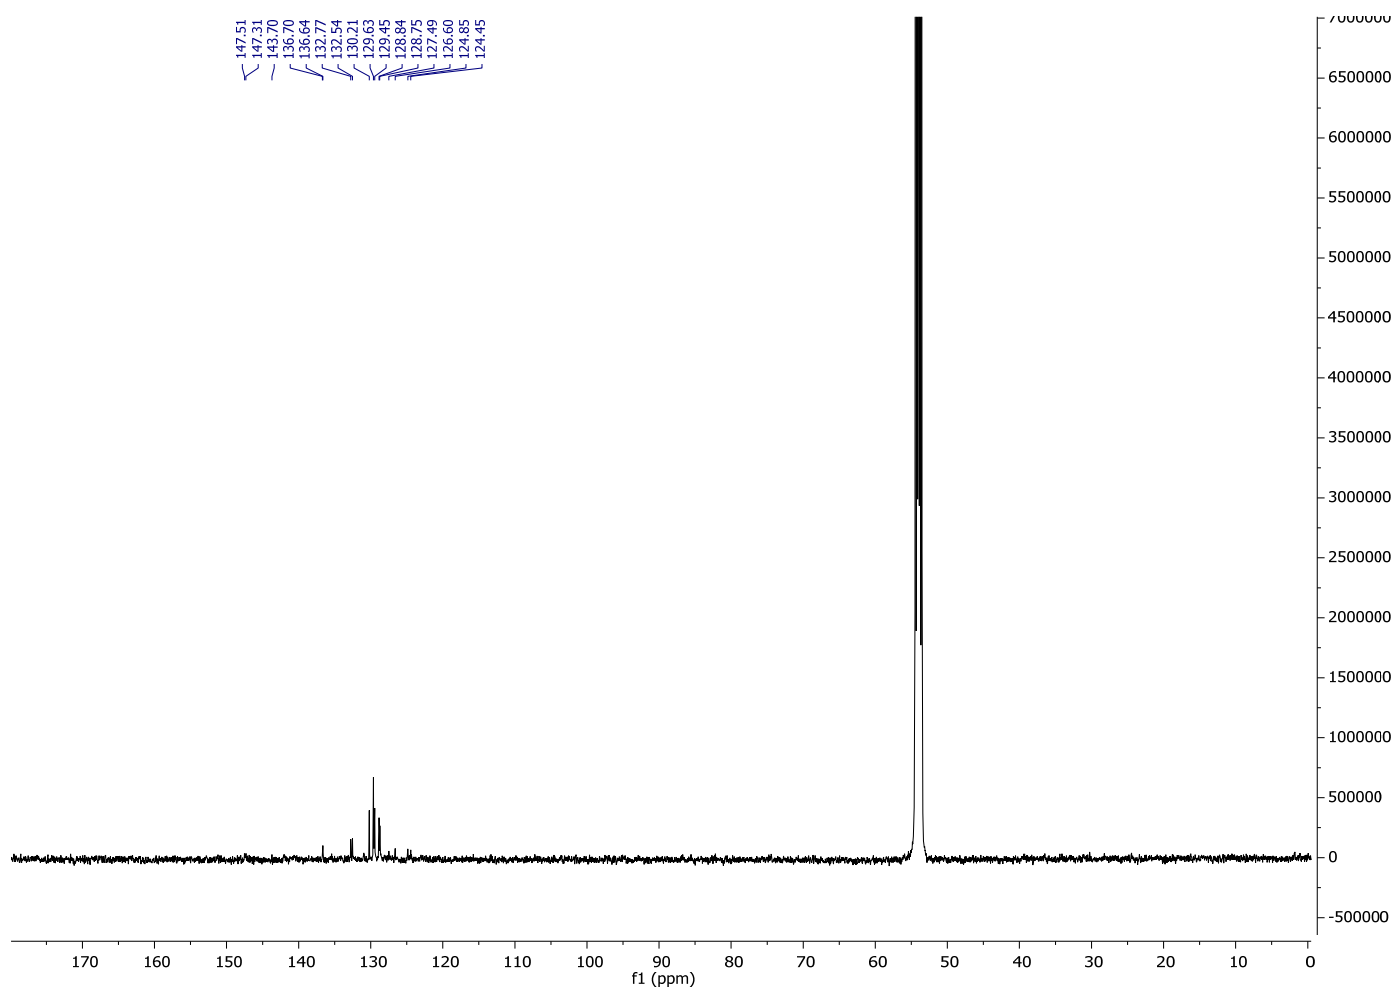

(5),  $^{13}\text{C}$ ,  $\text{CD}_2\text{Cl}_2$ , 125 MHz

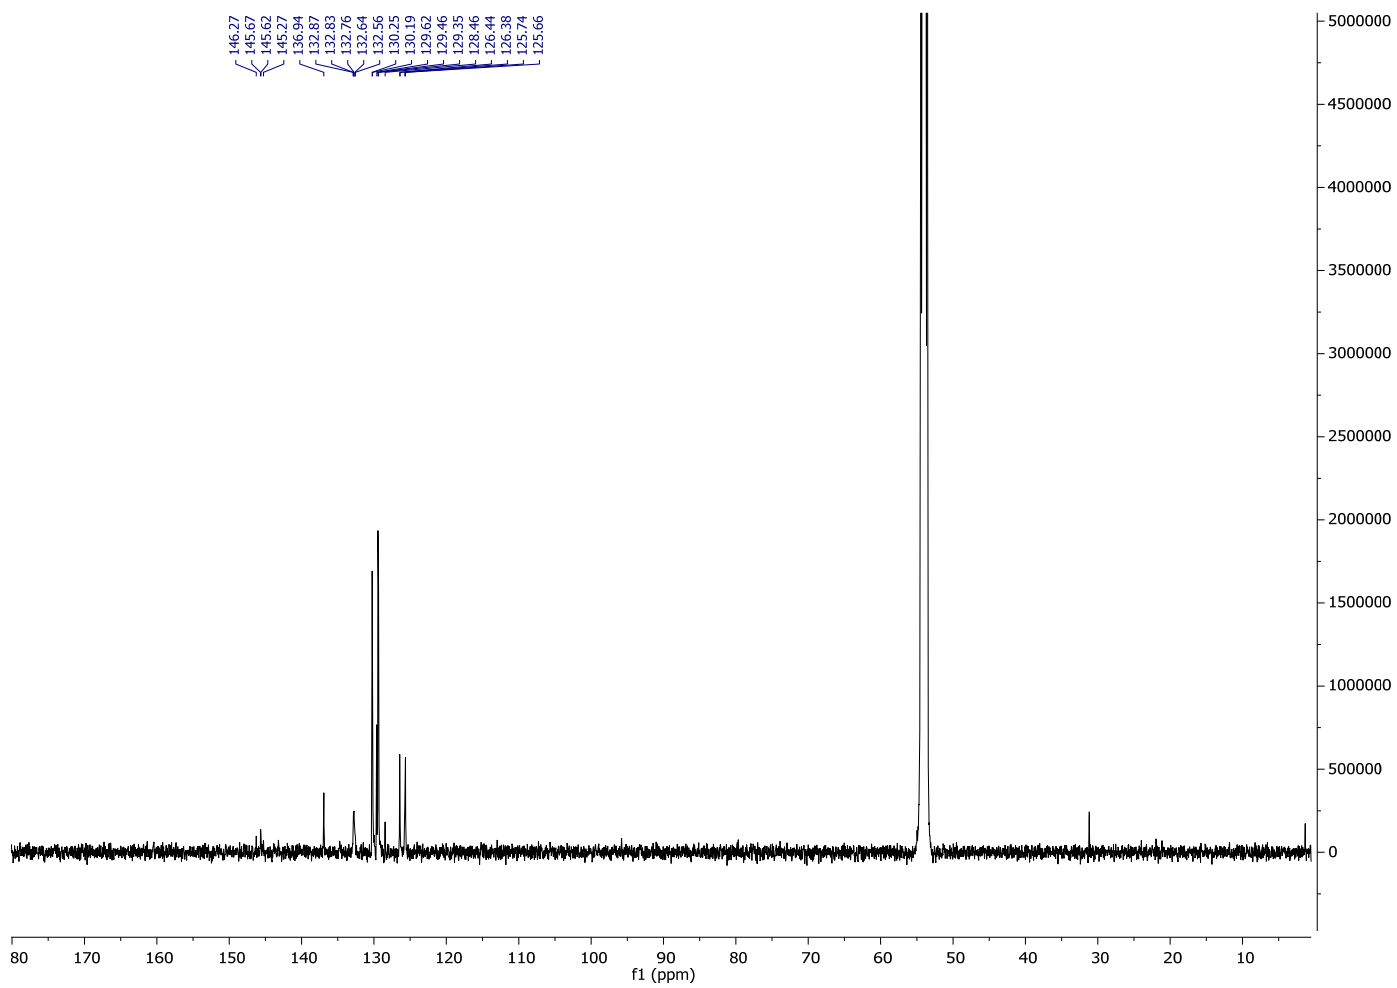

(6),  $^{13}\text{C}$ ,  $\text{CD}_2\text{Cl}_2$ , 100 MHz

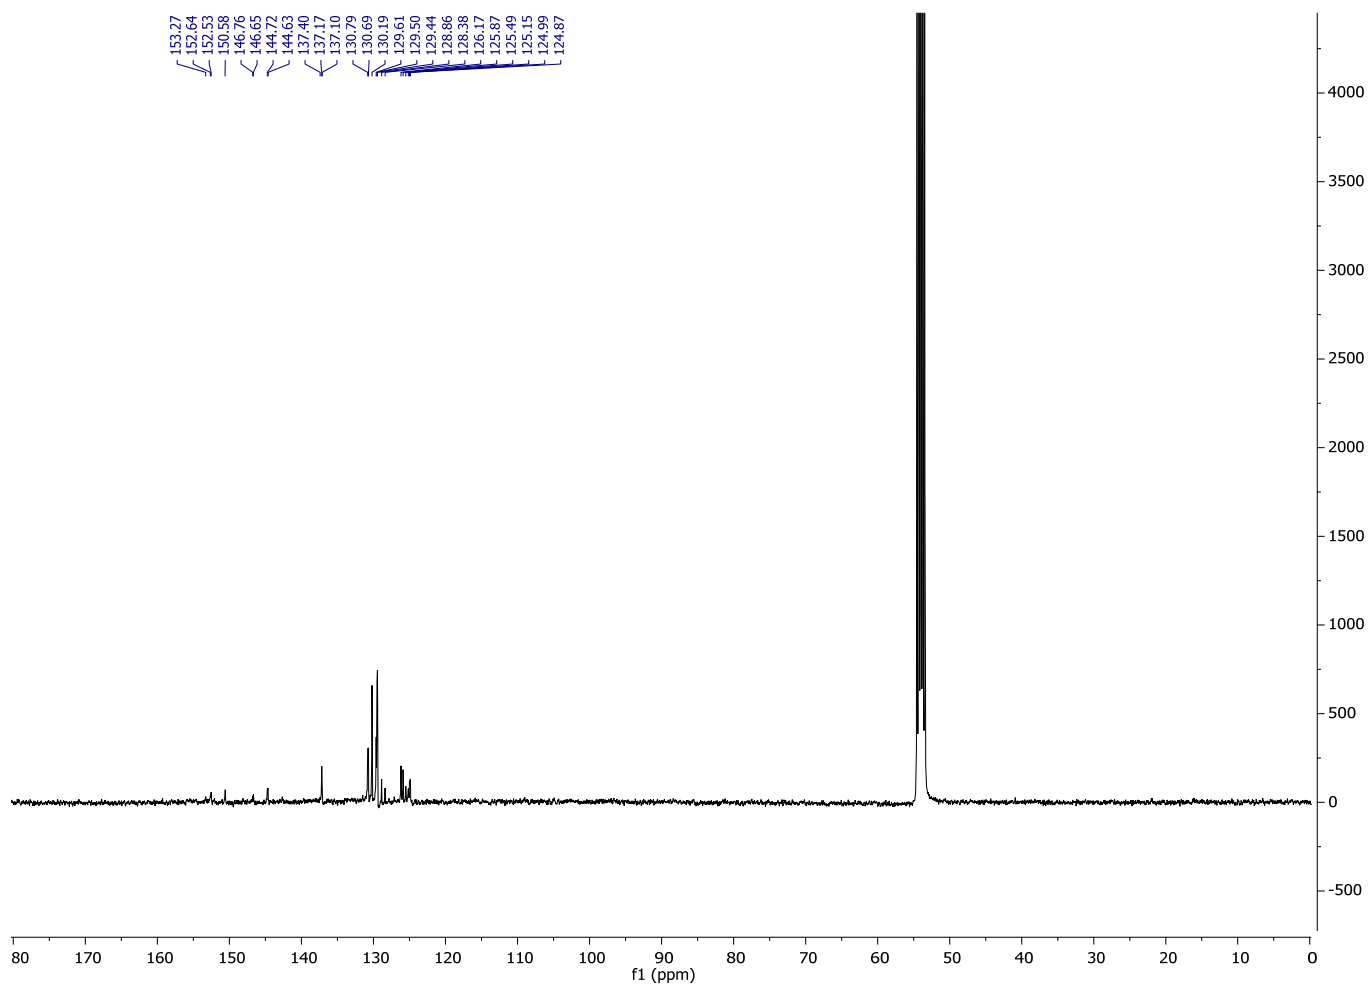

**3) Figure S2. HPLC traces at 450 nm of complexes 1-6.**

(1), HPLC trace 450 nm.

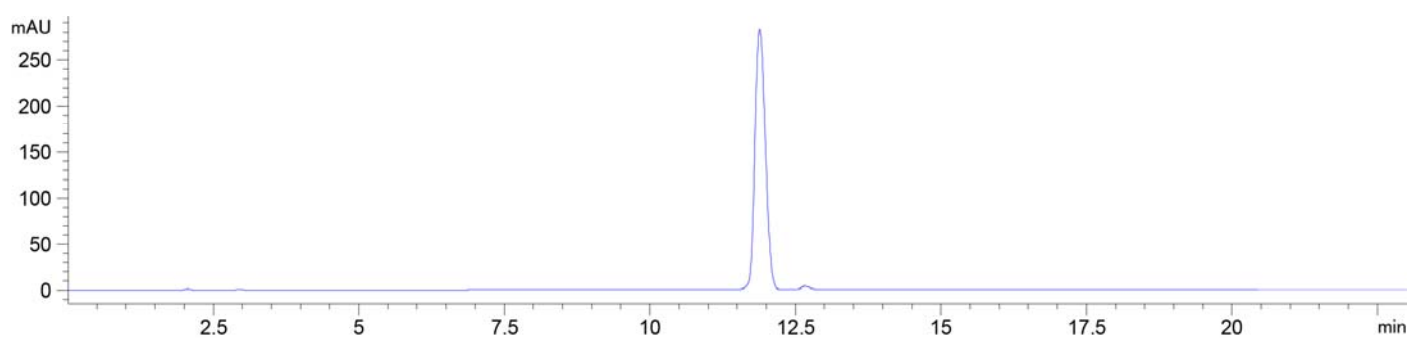

(2), HPLC trace 450 nm.

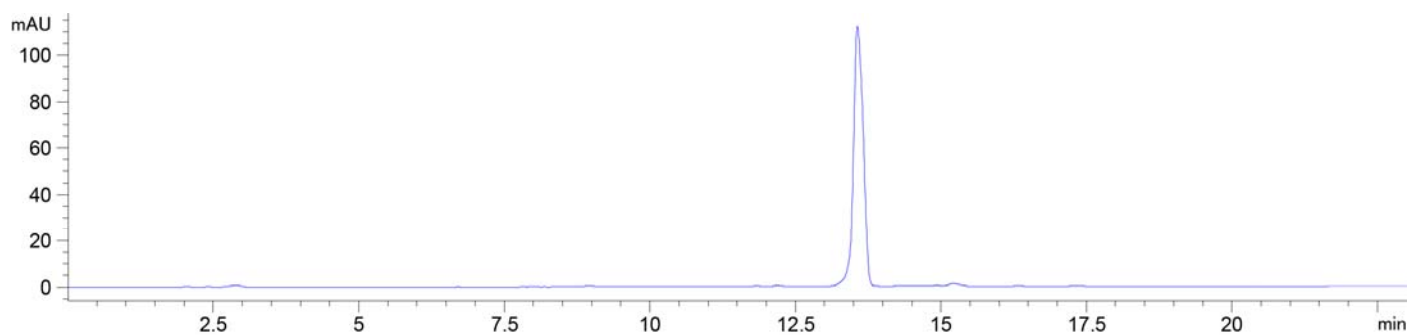

(3), HPLC trace 450 nm.

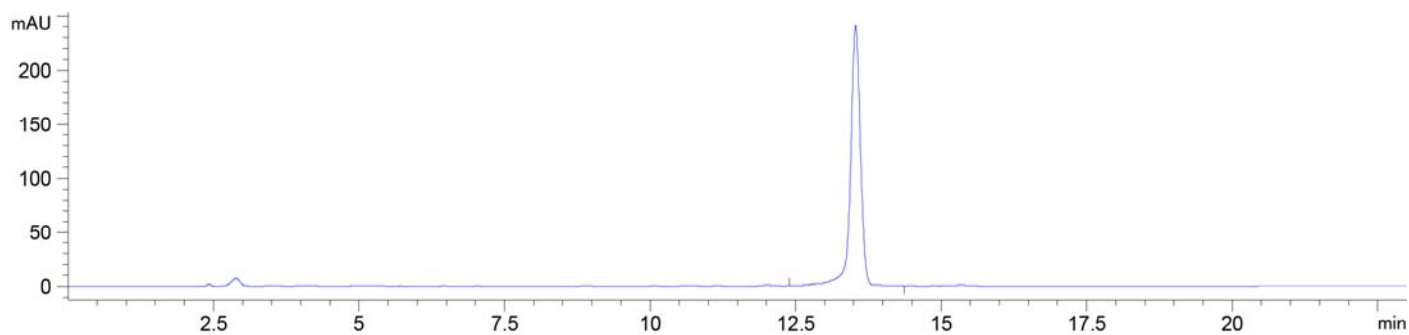

(4), HPLC trace 450 nm.

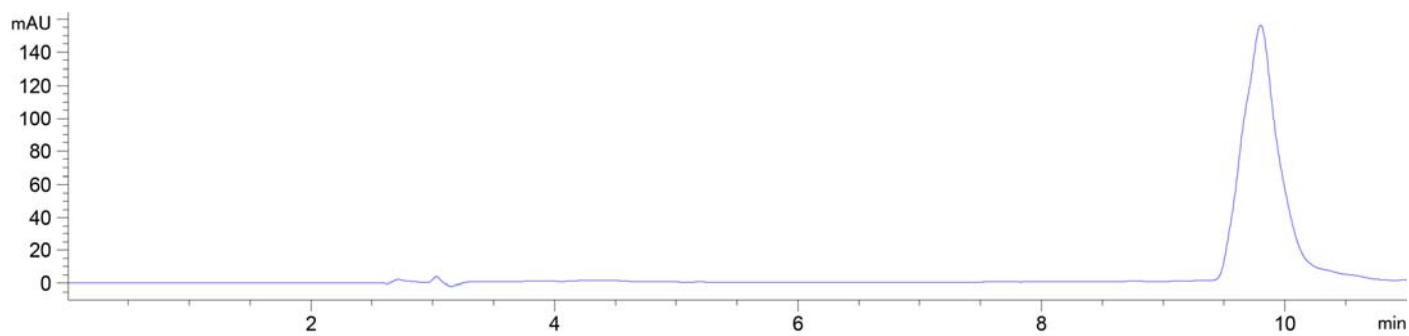



(5), HPLC trace 450 nm.

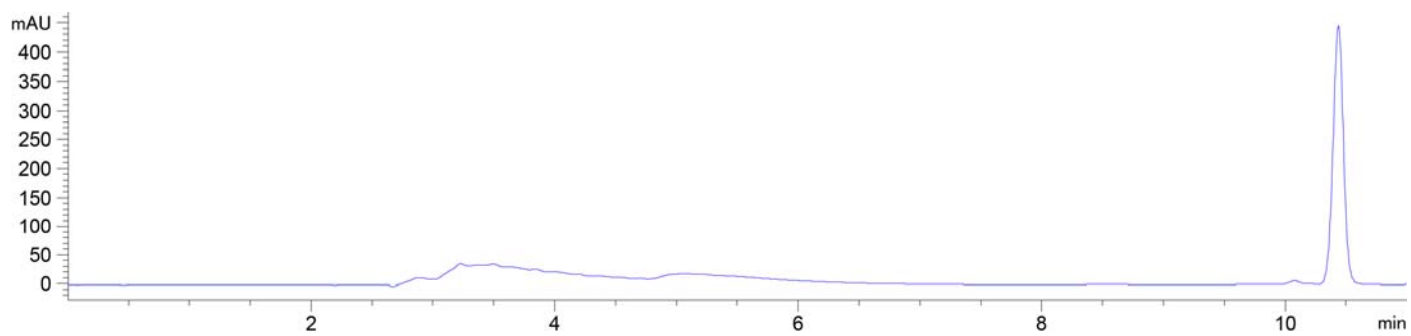

(6), HPLC trace 450 nm.

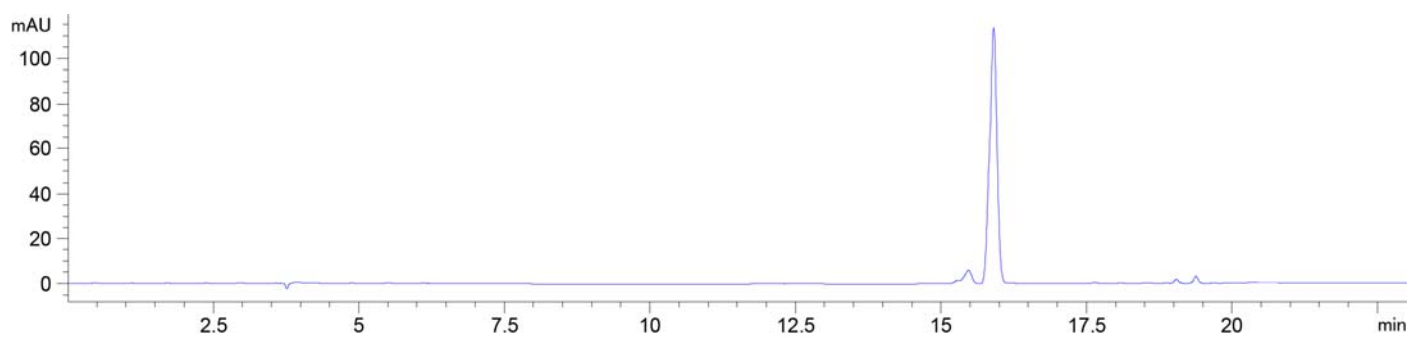

4) **Figure S3.** EPR spectra of a) **1**, b) **2**, c) **3** and d) **4** at -40 °C and -140 °C and e) **6ox** at -140 °C.

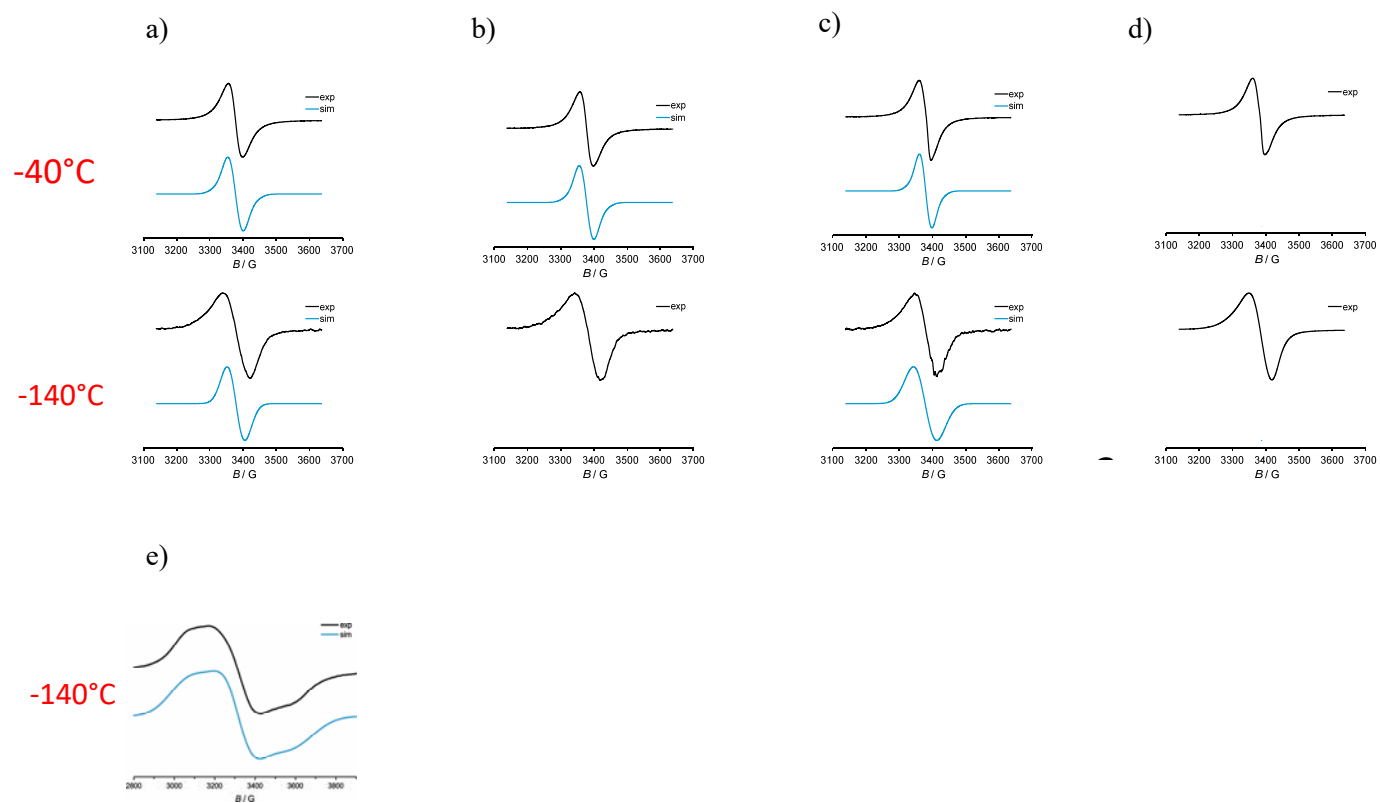

5) **Table S2.** Computed and Experimental  $g$ -Tensors (absolute  $g$ -values with  $g$ -shifts in ppt in parentheses).  $\langle S^2 \rangle$  values correspond to the expectation values of the Kohn-Sham determinant.

|              |                       | B3LYP         | exp.           |
|--------------|-----------------------|---------------|----------------|
| <b>(1)</b>   | $g_{\text{iso}}$      | 2.0055 (3.2)  | 1.9893 (-13.0) |
|              | $g_{11}$              | 2.0020 (-0.3) |                |
|              | $g_{22}$              | 2.0070 (4.7)  |                |
|              | $g_{33}$              | 2.0074 (5.0)  |                |
|              | $g_{33}-g_{11}$       | 0.0054        |                |
|              | $\langle S^2 \rangle$ | 0.759         |                |
| <b>(3)</b>   | $g_{\text{iso}}$      | 2.0054 (3.1)  | 1.9872 (-15.1) |
|              | $g_{11}$              | 2.0020 (-0.3) |                |
|              | $g_{22}$              | 2.0070 (4.7)  |                |
|              | $g_{33}$              | 2.0071 (4.9)  |                |
|              | $g_{33}-g_{11}$       | 0.0051        |                |
|              | $\langle S^2 \rangle$ | 0.759         |                |
| <b>(5ox)</b> | $g_{\text{iso}}$      | 2.0089 (6.6)  | 2.019 (16.7)   |
|              | $g_{11}$              | 2.0019 (-0.4) |                |
|              | $g_{22}$              | 2.0090 (6.6)  |                |
|              | $g_{33}$              | 2.0159 (13.6) |                |
|              | $g_{33}-g_{11}$       | 0.0140        |                |
|              | $\langle S^2 \rangle$ | 0.759         |                |
| <b>(6ox)</b> | $g_{\text{iso}}$      | 2.0076 (5.3)  | 2.032 (29.7)   |
|              | $g_{11}$              | 2.0038 (1.5)  | 1.870 (-132.3) |
|              | $g_{22}$              | 2.0076 (5.3)  | 2.025 (22.7)   |
|              | $g_{33}$              | 2.0076 (8.9)  | 2.190 (187.7)  |
|              | $g_{33}-g_{11}$       | 0.0074        | 0.32           |
|              | $\langle S^2 \rangle$ | 0.760         |                |

**6) Figure S4.** Voltammograms recorded by CV and with the use of RDE of complexes **2-6**.

(2) (from -2.1 to +1 V) at a glassy carbon electrode in DMF (1 mM) containing Bu<sub>4</sub>NPF<sub>6</sub> (100 mM) as supporting electrolyte and decamethylferrocene as an internal standard (0.25 mM). Data were recorded versus saturated calomel electrode at scan rate of 100 mV/s and recalculated versus Me<sub>10</sub>Fc<sup>0/+</sup> potential value (-0.09 V and -0.09 V for RDE and CV respectively).

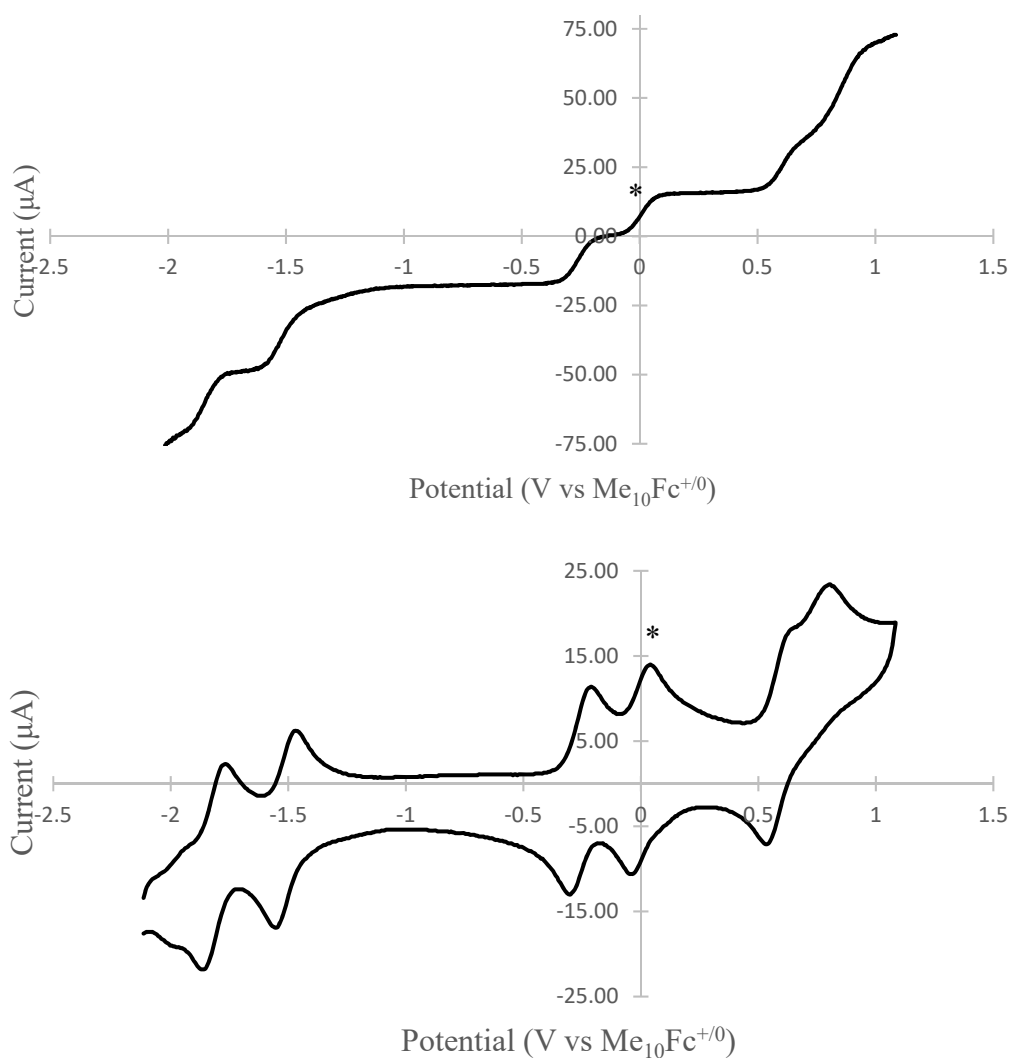

**(3)** (from -2.1 to +1 V) at a glassy carbon electrode in DMF (1 mM) containing Bu<sub>4</sub>NPF<sub>6</sub> (100 mM) as supporting electrolyte and decamethylferrocene as an internal standard (0.25 mM). Data were recorded versus saturated calomel electrode at scan rate of 100 mV/s and recalculated versus Me<sub>10</sub>Fc<sup>0/+</sup> potential value (-0.07 V and -0.05 V for RDE and CV respectively).

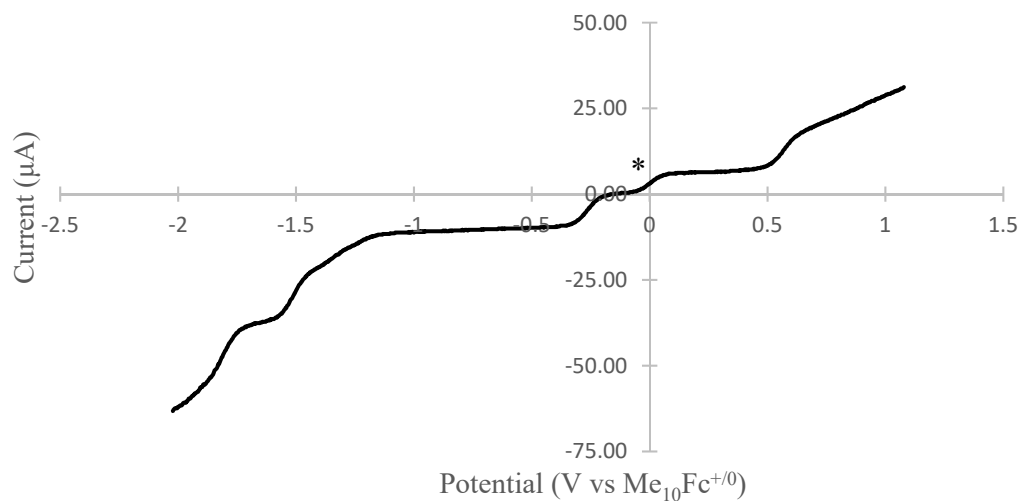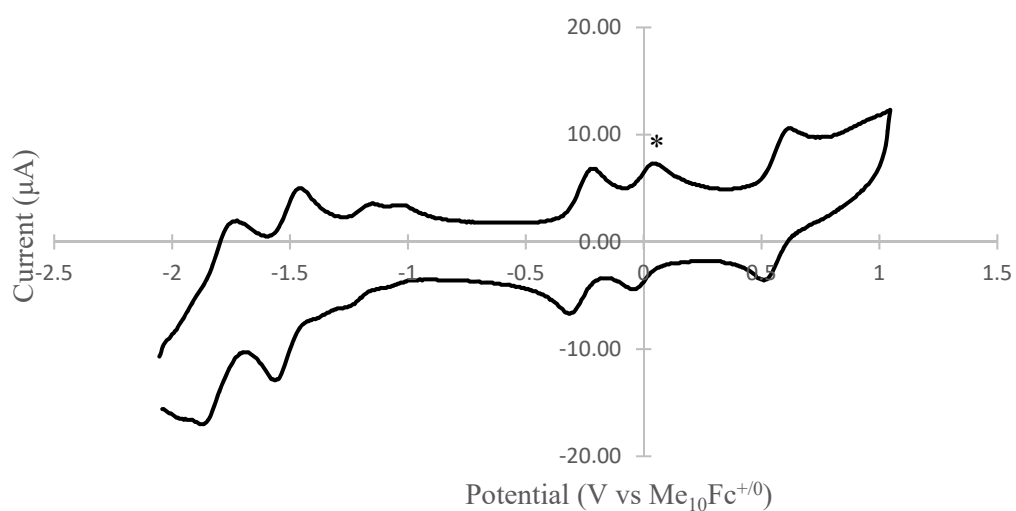

(4) (from -2.1 to +1 V) at a glassy carbon electrode in DMF (1 mM) containing  $\text{Bu}_4\text{NPF}_6$  (100 mM) as supporting electrolyte and decamethylferrocene as an internal standard (0.25 mM). Data were recorded versus saturated calomel electrode at scan rate of 100 mV/s and recalculated versus  $\text{Me}_{10}\text{Fc}^{0/+}$  potential value (-0.04 V and -0.04 V for RDE and CV respectively).

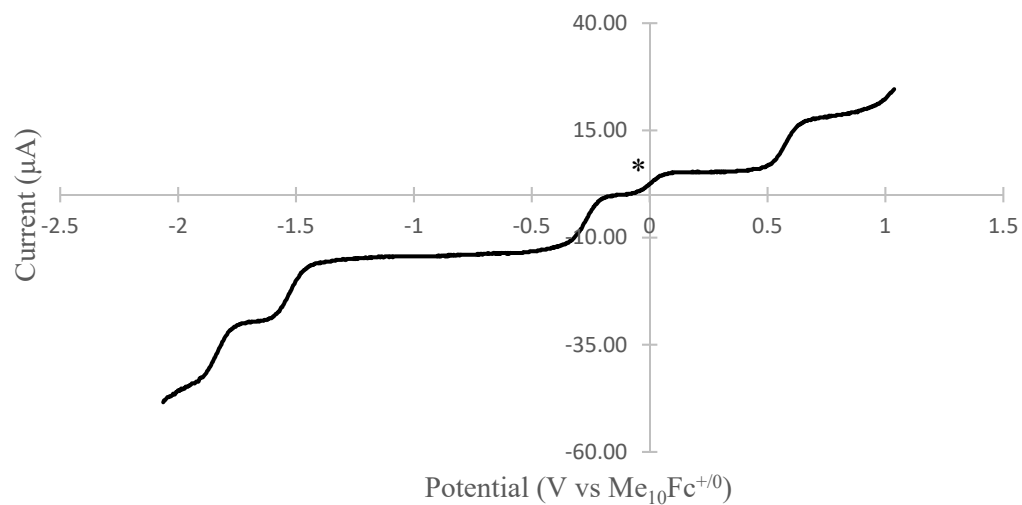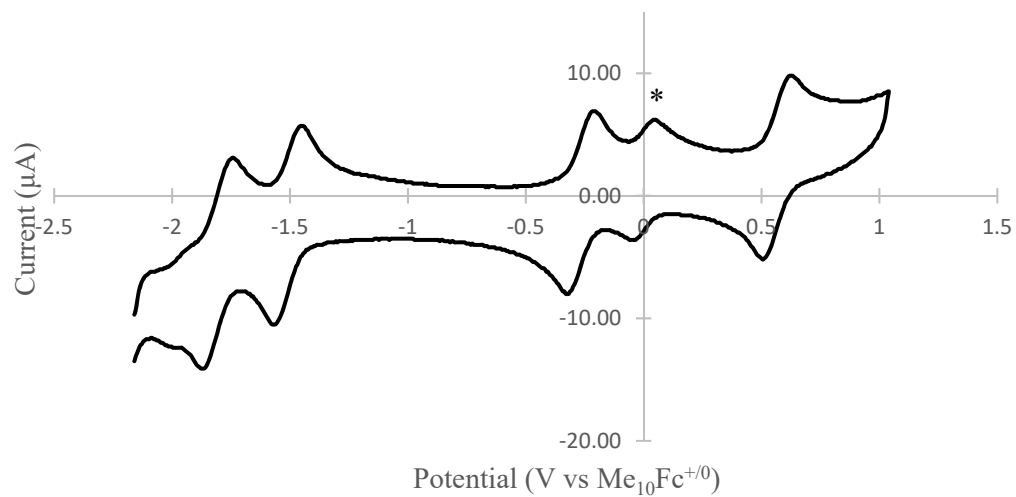

(5) (from -2.1 to +1 V) at a glassy carbon electrode in DMF (1 mM) containing Bu<sub>4</sub>NPF<sub>6</sub> (100 mM) as supporting electrolyte and decamethylferrocene as an internal standard (0.25 mM). Data were recorded versus saturated calomel electrode at scan rate of 100 mV/s and recalculated versus Me<sub>10</sub>Fc<sup>0/+</sup> potential value (-0.07 V and -0.09 V for RDE and CV respectively).

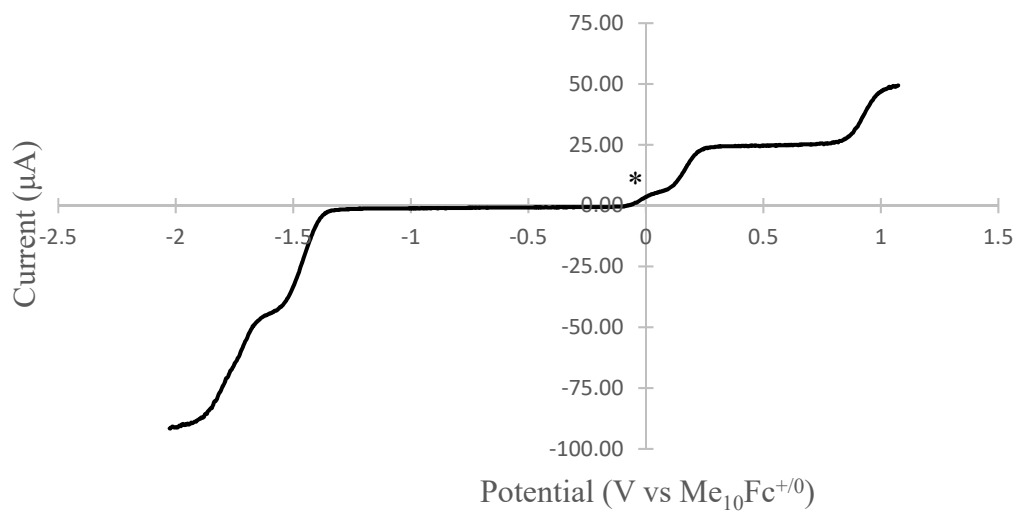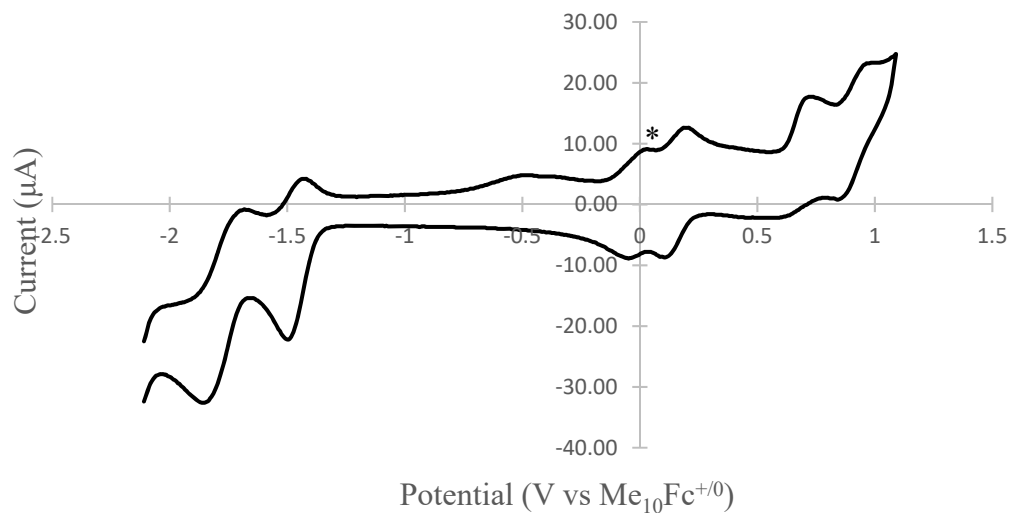

(6) (from -2.1 to +1 V) at a glassy carbon electrode in DMF (1 mM) containing  $\text{Bu}_4\text{NPF}_6$  (100 mM) as supporting electrolyte and decamethylferrocene as an internal standard (0.25 mM). Data were recorded versus saturated calomel electrode at scan rate of 100 mV/s and recalculated versus  $\text{Me}_{10}\text{Fc}^{0/+}$  potential value (-0.07 V and -0.09 V for RDE and CV respectively).

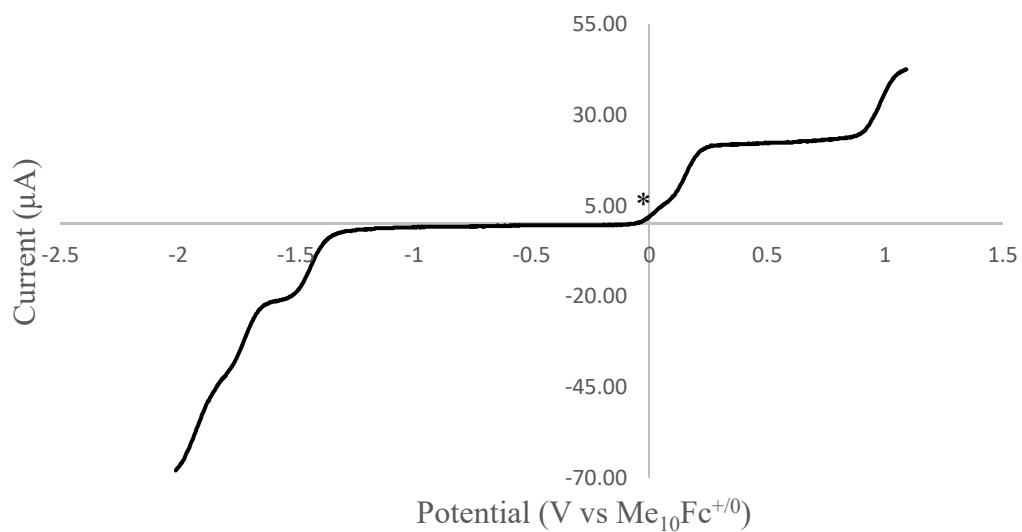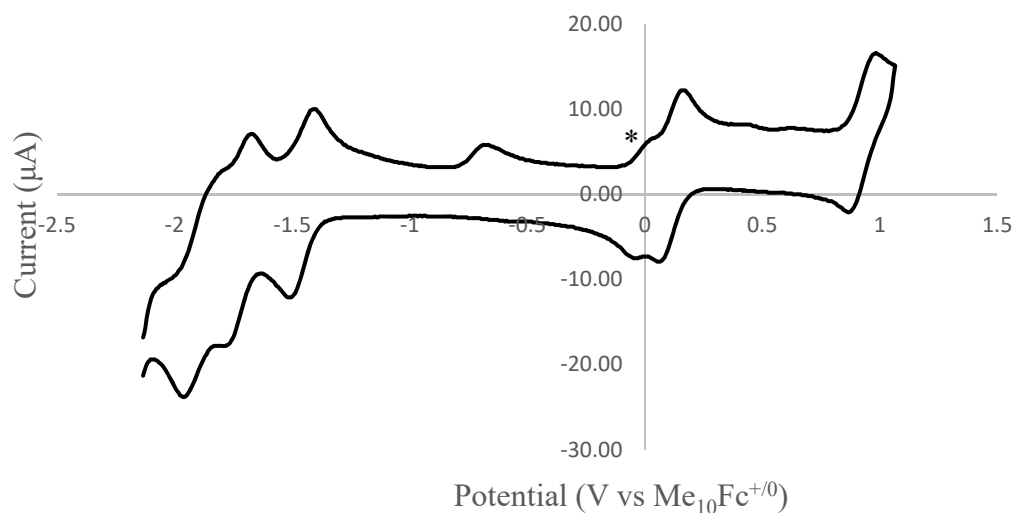



7) **Table S3.** Electrochemical data for complexes **1-4**

|                          |                                              | <b>Ph<sub>2</sub>Phen<sup>0/-</sup></b> | <b>Ph<sub>2</sub>Phen<sup>0/-</sup></b> | <b>sq/cat</b>  | <b>Ru<sup>II/III</sup></b> |
|--------------------------|----------------------------------------------|-----------------------------------------|-----------------------------------------|----------------|----------------------------|
| <b>Ru-sq<sup>*</sup></b> | <b>E<sub>1/2</sub><sup>a</sup> [V] (RDE)</b> | -1.876 ± 0.039                          | -1.578 ± 0.035                          | -0.249 ± 0.010 | 0.647 ± 0.018              |
|                          | <b>E<sub>1/2</sub><sup>b</sup> [V] (CV)</b>  | -1.816 ± 0.015                          | -1.507 ± 0.007                          | -0.209 ± 0.002 | 0.623 ± 0.005              |
| <b>1</b>                 | <b>E<sub>1/2</sub><sup>a</sup> [V] (RDE)</b> | -1.848 ± 0.015                          | -1.537 ± 0.008                          | -0.284 ± 0.005 | 0.595 ± 0.011              |
|                          | <b>E<sub>1/2</sub><sup>b</sup> [V] (CV)</b>  | -1.798 ± 0.001                          | -1.503 ± 0.002                          | -0.251 ± 0.001 | 0.602 ± 0.002              |
| <b>2</b>                 | <b>E<sub>1/2</sub><sup>a</sup> [V] (RDE)</b> | -1.833 ± 0.007                          | -1.497 ± 0.012                          | -0.252 ± 0.011 | 0.615 ± 0.003              |
|                          | <b>E<sub>1/2</sub><sup>b</sup> [V] (CV)</b>  | -1.813 ± 0.002                          | -1.510 ± 0.002                          | -0.256 ± 0.001 | 0.592 ± 0.004              |
| <b>3</b>                 | <b>E<sub>1/2</sub><sup>a</sup> [V] (RDE)</b> | -1.836 ± 0.028                          | -1.472 ± 0.070                          | -0.265 ± 0.019 | 0.636 ± 0.011              |
|                          | <b>E<sub>1/2</sub><sup>b</sup> [V] (CV)</b>  | -1.797 ± 0.002                          | -1.511 ± 0.001                          | -0.264 ± 0.002 | 0.569 ± 0.003              |
| <b>4</b>                 | <b>E<sub>1/2</sub><sup>a</sup> [V] (RDE)</b> | -1.839 ± 0.017                          | -1.515 ± 0.005                          | -0.271 ± 0.008 | 0.574 ± 0.001              |
|                          | <b>E<sub>1/2</sub><sup>b</sup> [V] (CV)</b>  | -1.807 ± 0.006                          | -1.506 ± 0.003                          | -0.265 ± 0.002 | 0.567 ± 0.004              |

\* Values taken from<sup>[2]</sup> We however note that these experiments were performed on the same days.

<sup>a</sup> E<sub>1/2</sub> = half-wave potential in Volts.

<sup>b</sup> E<sub>1/2</sub> = (E<sub>pa</sub> + E<sub>pc</sub>)/2 in Volts.

8) **Figure S5.** UV/Vis/NIR-spectroelectrochemistry data for complex 1 in the presence of the reducing agent glutathione.

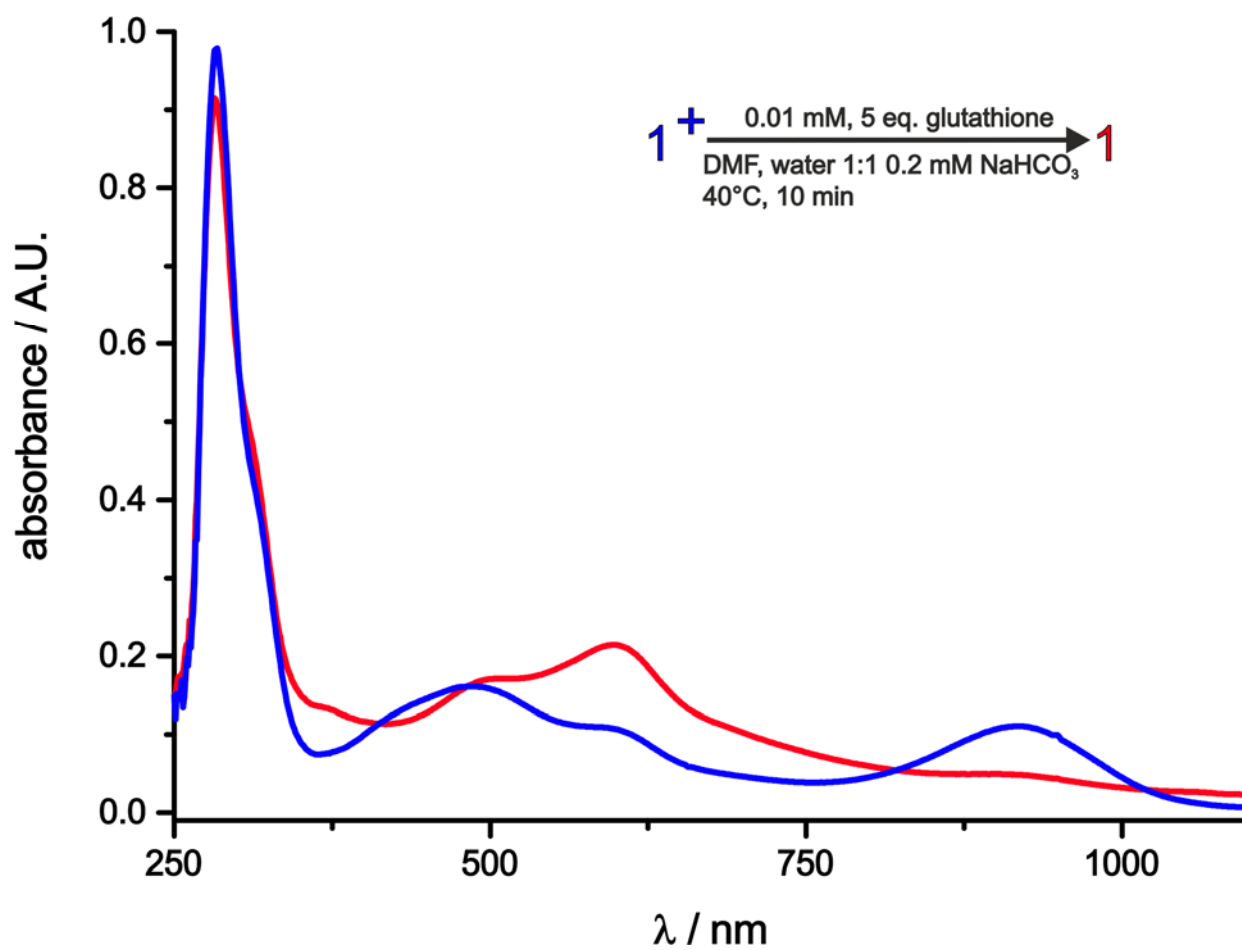

9) **Table S4.** Electrochemical data for complexes **5** and **6**.

|          |                                              | <b>Ph<sub>2</sub>Phen<sup>0/-</sup></b> | <b>Ph<sub>2</sub>Phen<sup>0/-</sup></b> | <b>Ox1</b>    | <b>Ox2</b>    |
|----------|----------------------------------------------|-----------------------------------------|-----------------------------------------|---------------|---------------|
| <b>5</b> | <b>E<sub>1/2</sub><sup>a</sup> [V] (RDE)</b> | -1.746 ± 0.003                          | -1.423 ± 0.002                          | 0.182 ± 0.005 | 0.927 ± 0.008 |
|          | <b>E<sub>1/2</sub><sup>b</sup> [V] (CV)</b>  | -1.764 ± 0.011                          | -1.456 ± 0.003                          | 0.162 ± 0.001 | 0.910 ± 0.003 |
| <b>6</b> | <b>E<sub>1/2</sub><sup>a</sup> [V] (RDE)</b> | -1.737 ± 0.009                          | -1.440 ± 0.009                          | 0.164 ± 0.013 | 0.970 ± 0.009 |
|          | <b>E<sub>1/2</sub><sup>b</sup> [V] (CV)</b>  | -1.734 ± 0.006                          | -1.456 ± 0.003                          | 0.114 ± 0.004 | 0.929 ± 0.007 |

<sup>a</sup> E<sub>1/2</sub> = half-wave potential in Volts.

<sup>b</sup> E<sub>1/2</sub> = (E<sub>pa</sub> + E<sub>pc</sub>)/2 in Volts.

**10) Figure S6.** Overlap of  $^1\text{H}$  spectra of complexes **1-6** in DMSO over 96 h.

(1)

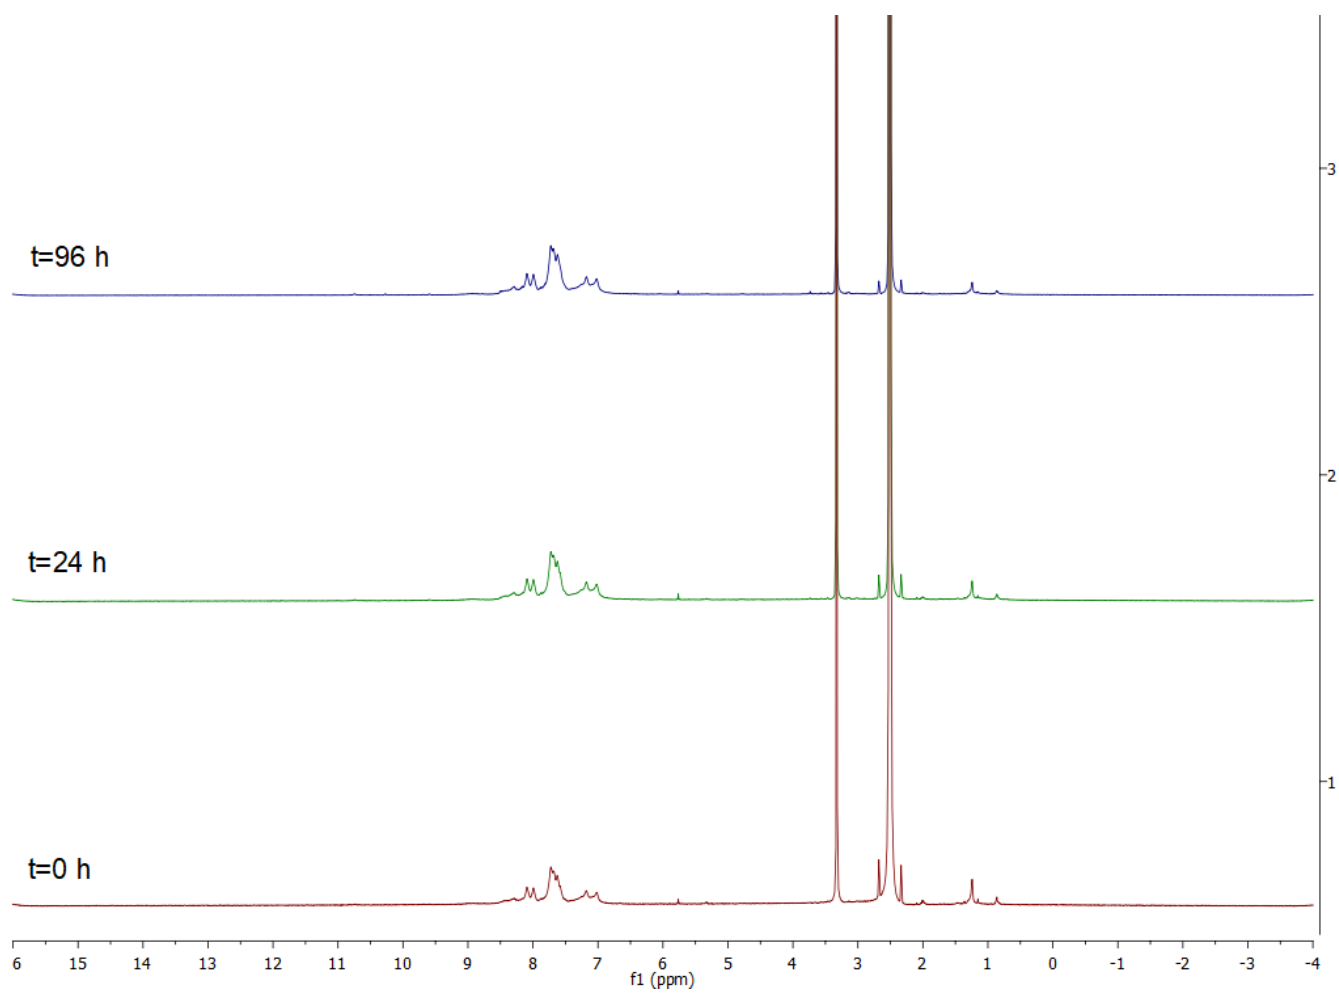

(2)

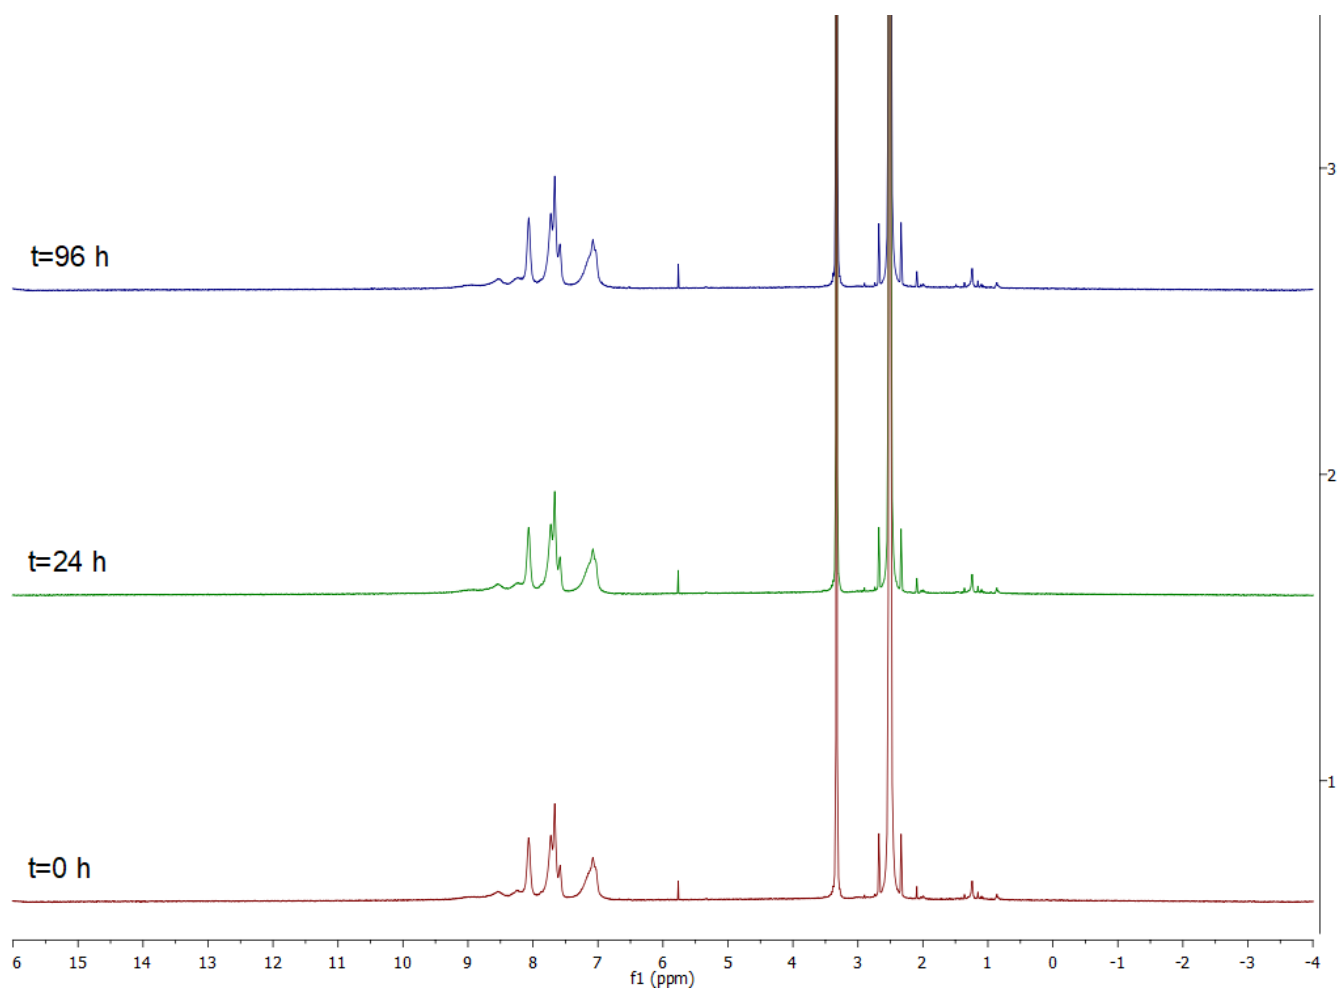

(3)

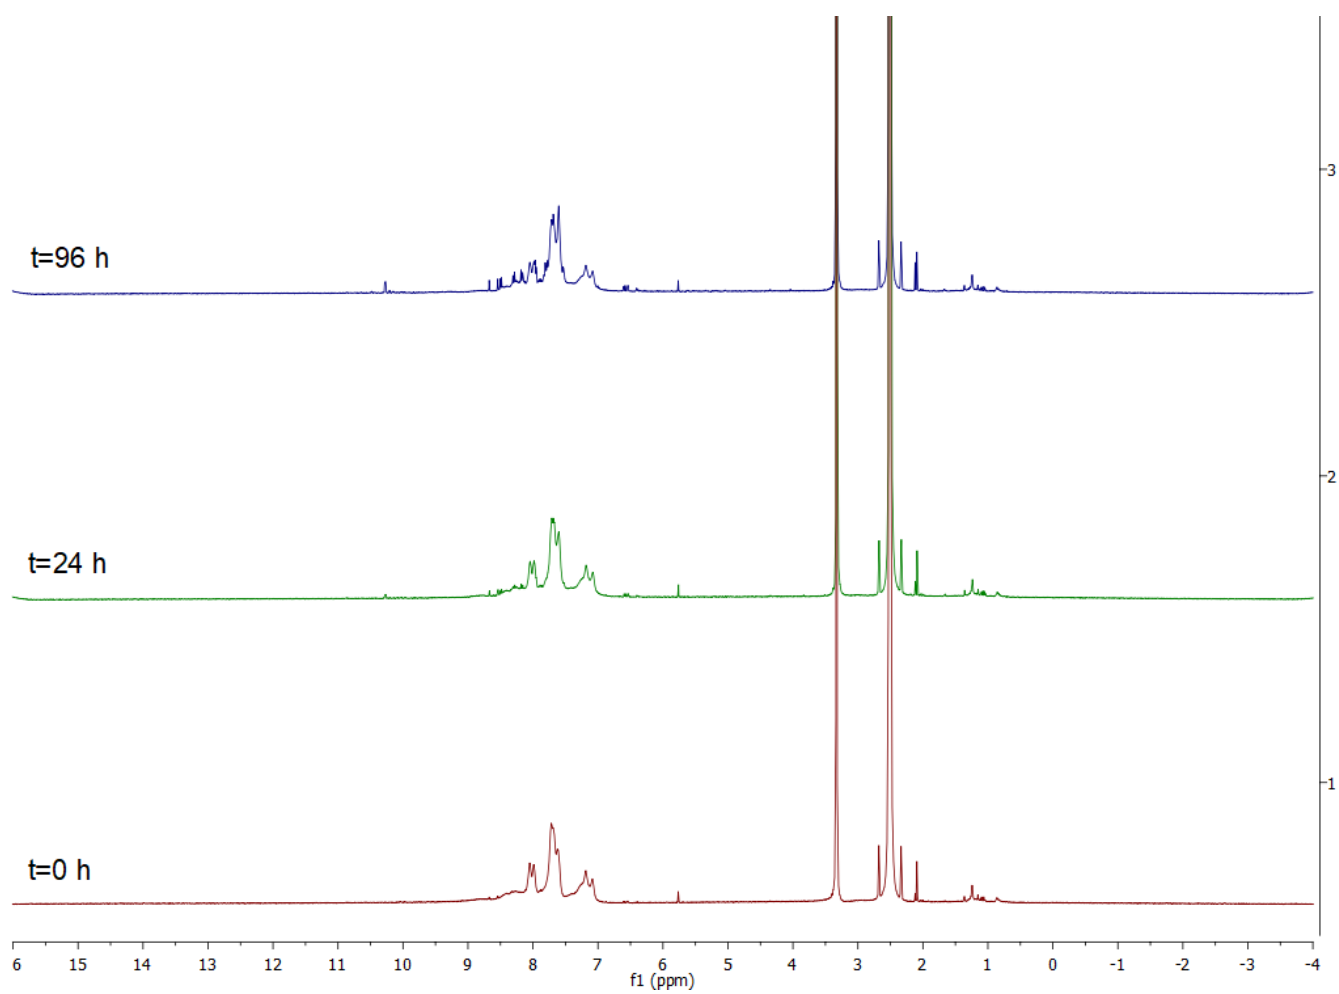

(4)

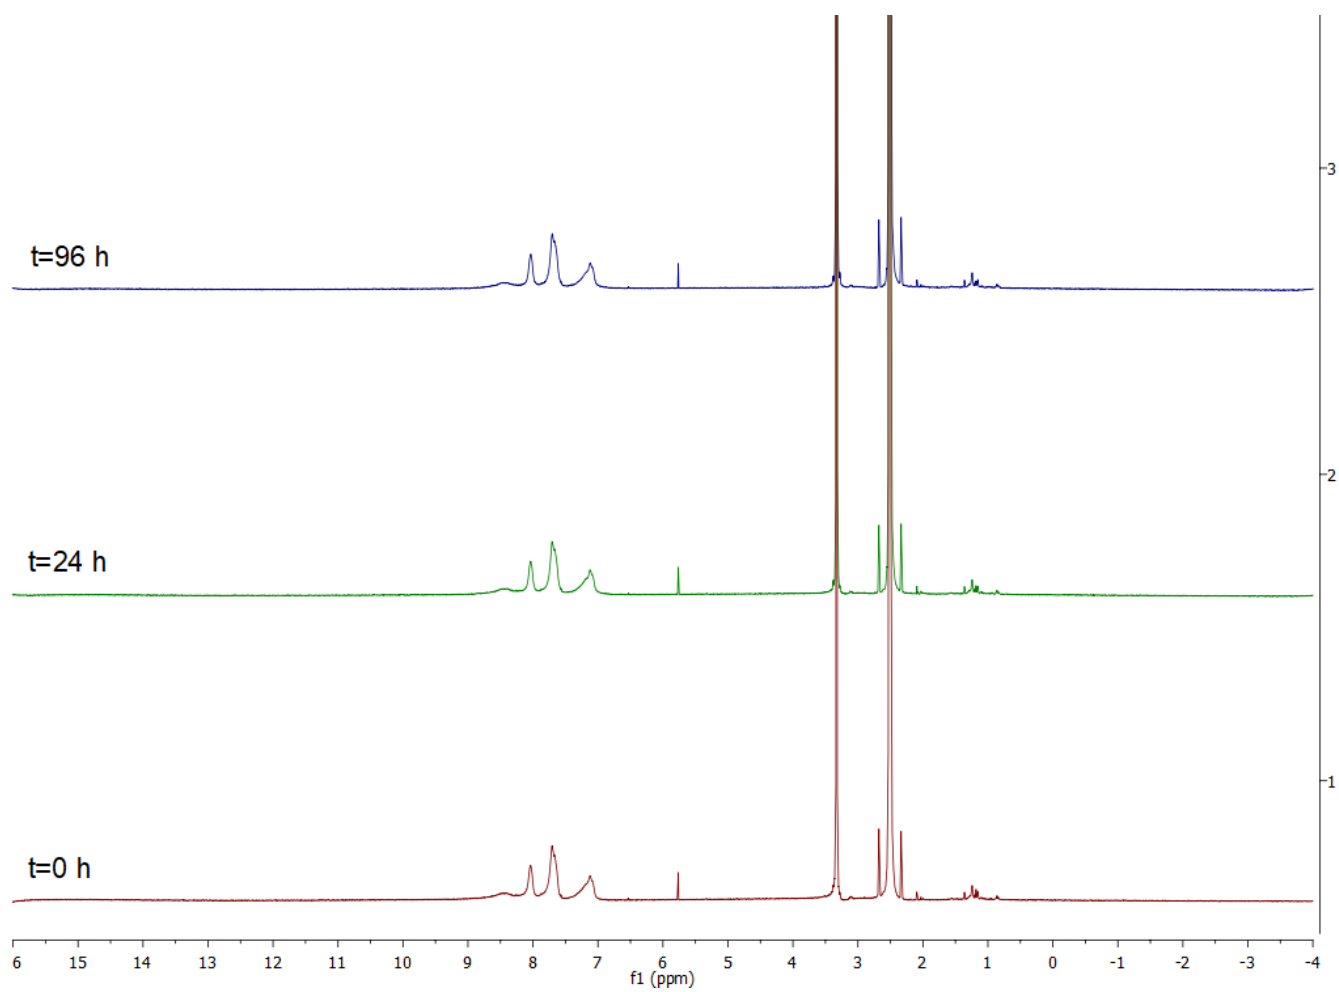

(5)

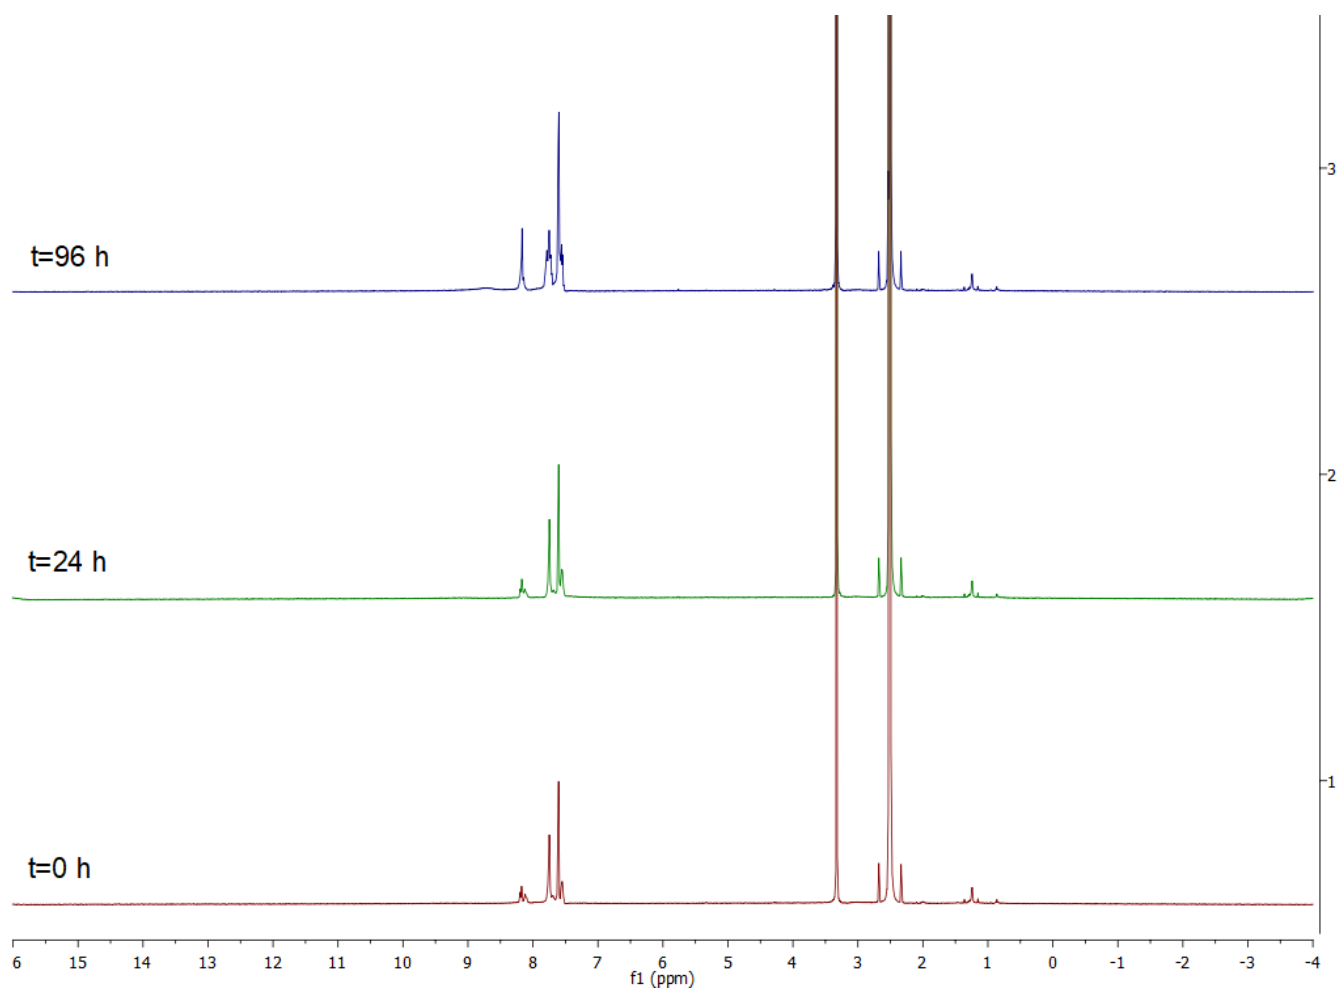



(6)

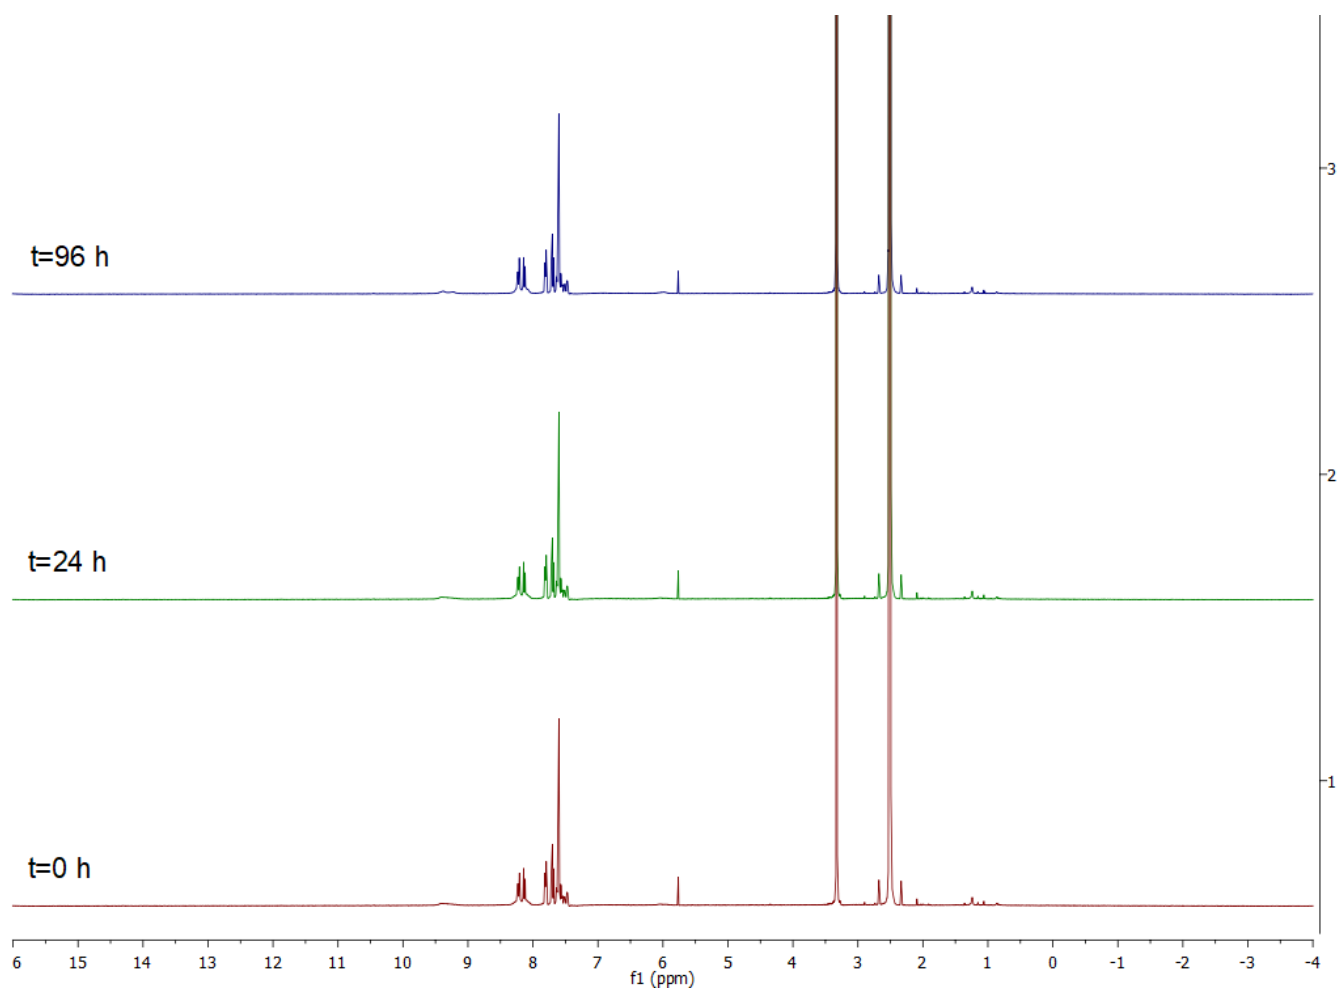

11) **Figure S7.** Percentage concentration of complex **1** in human plasma, normalized with respect to the internal standard (caffeine) and plotted against time.

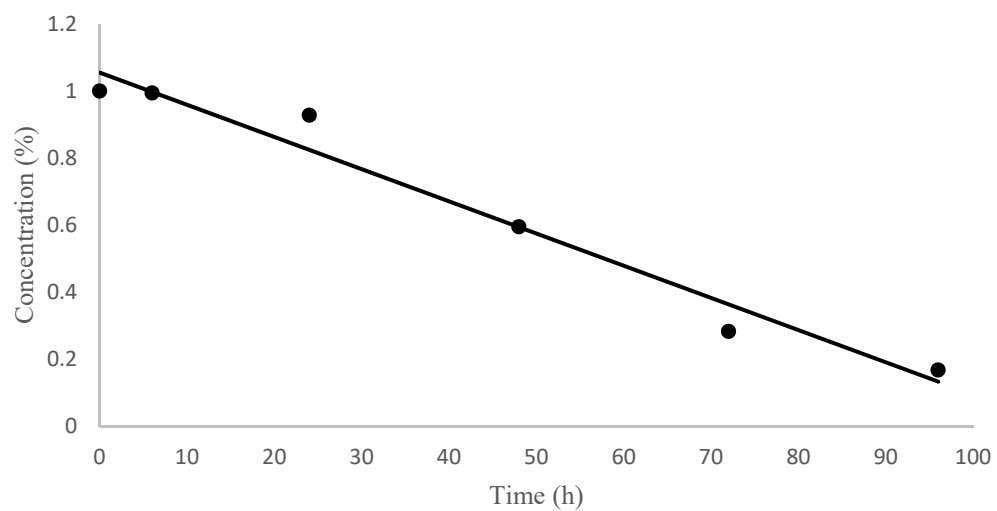

## 12) Figure S8. Fluorometric cell viability assay.

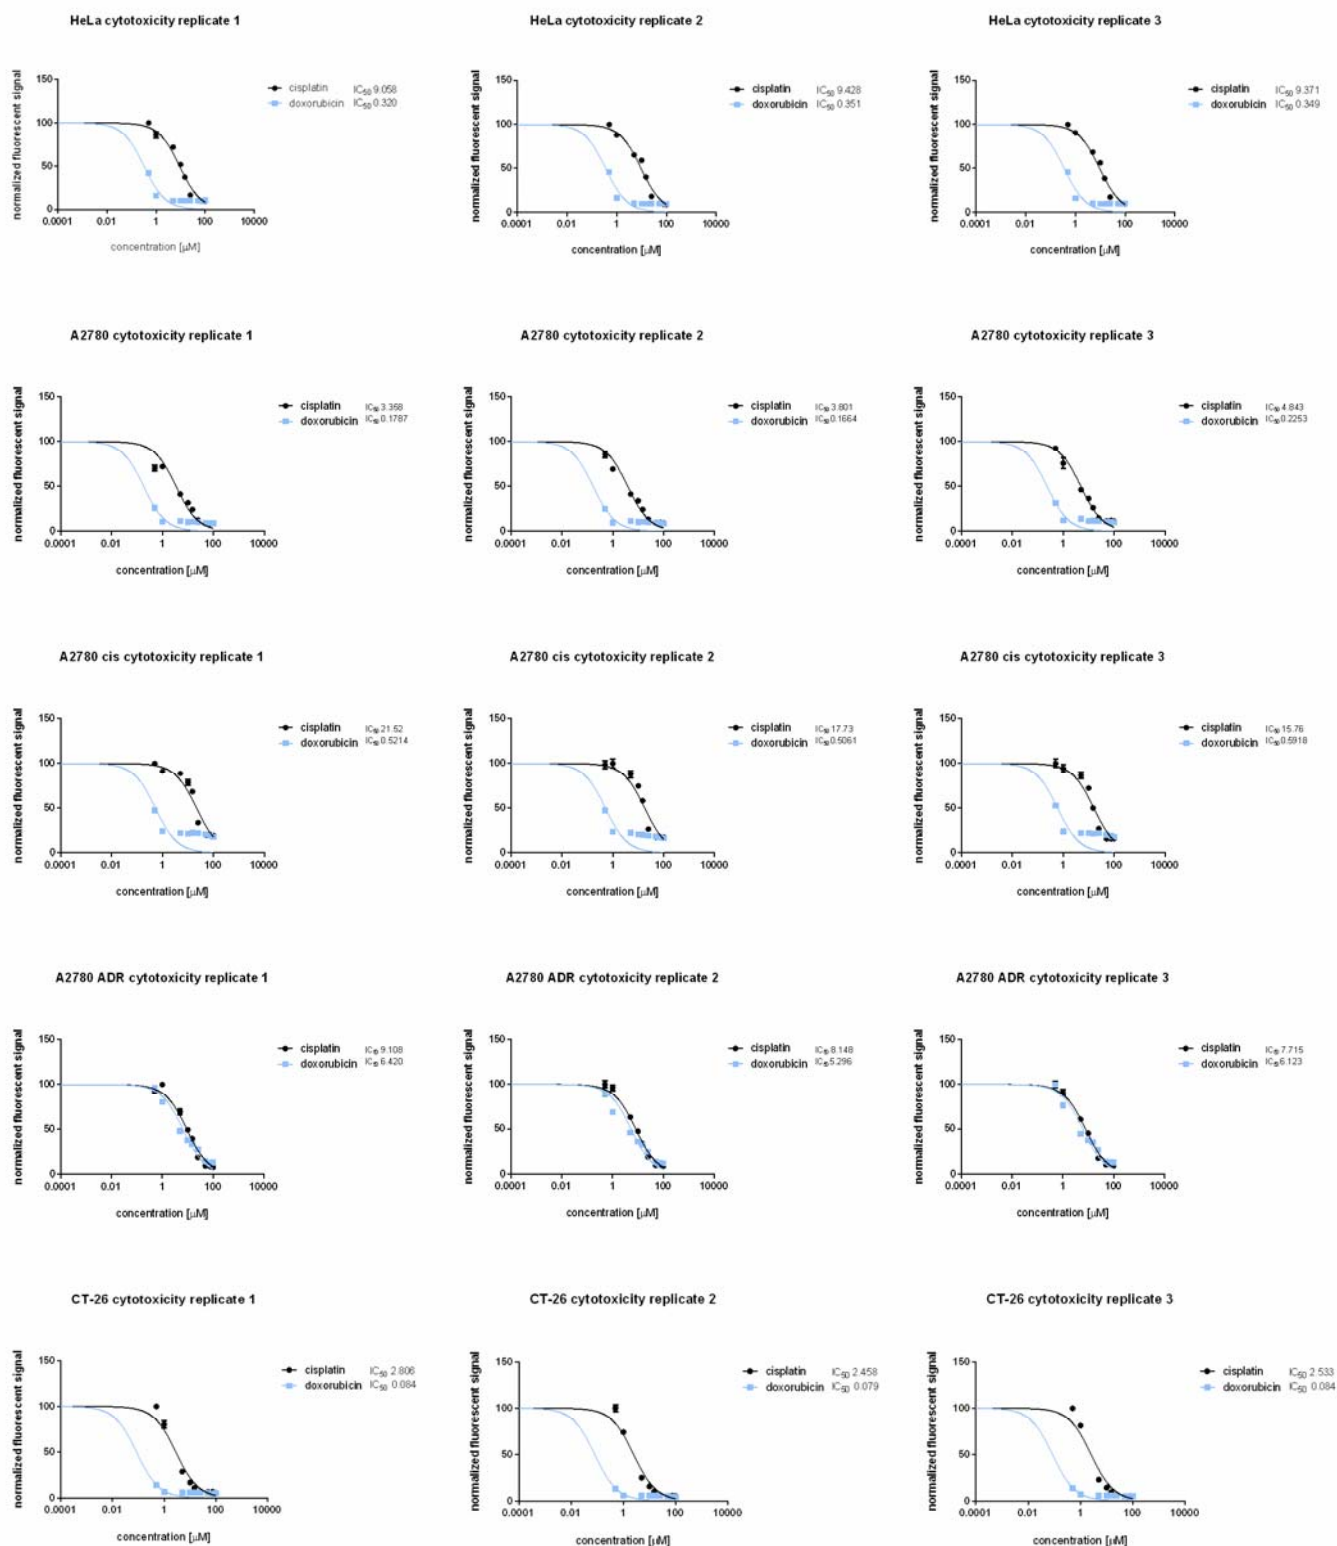

CT-26 LUC cytotoxicity replicate 1

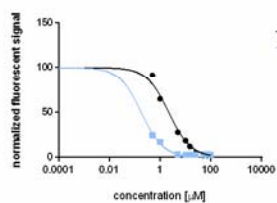

CT-26 LUC cytotoxicity replicate 2

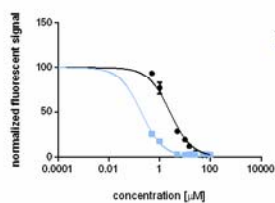

CT-26 LUC cytotoxicity replicate 3

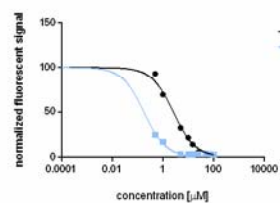

RPE-1 cytotoxicity replicate 1

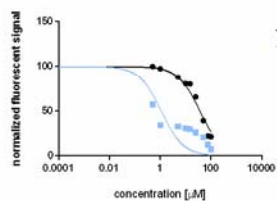

RPE-1 cytotoxicity replicate 2

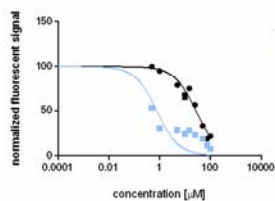

RPE-1 cytotoxicity replicate 3

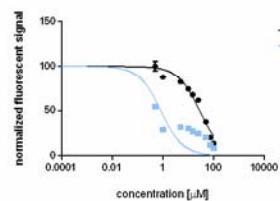

HeLa cytotoxicity replicate 1

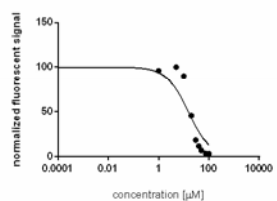

HeLa cytotoxicity replicate 2

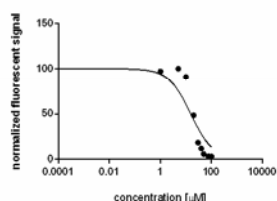

HeLa cytotoxicity replicate 3

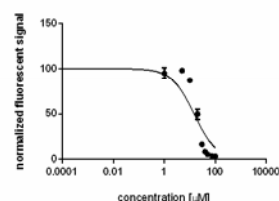

A2780 cytotoxicity replicate 1

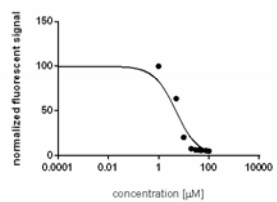

A2780 cytotoxicity replicate 2

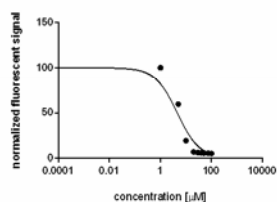

A2780 cytotoxicity replicate 3

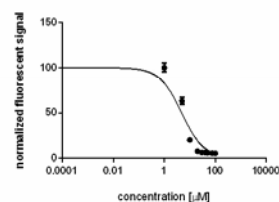

A2780 ADR cytotoxicity replicate 1

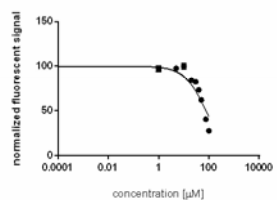

A2780 ADR cytotoxicity replicate 2

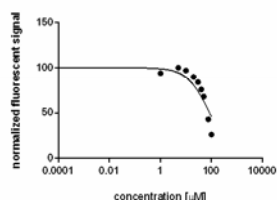

A2780 ADR cytotoxicity replicate 3

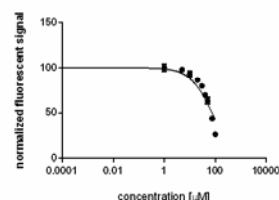

A2780 cis cytotoxicity replicate 1

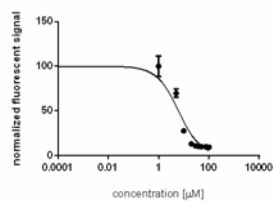

A2780 cis cytotoxicity replicate 2

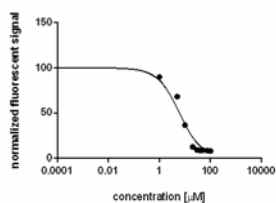

A2780 cis cytotoxicity replicate 3

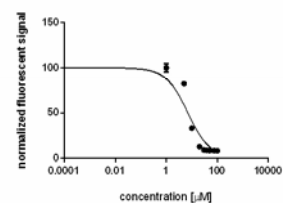

CT-26 cytotoxicity replicate 1

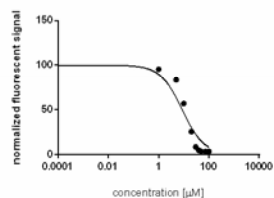

CT-26 cytotoxicity replicate 2

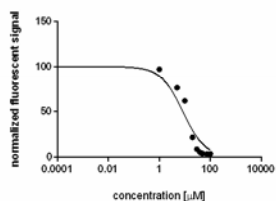

CT-26 cytotoxicity replicate 3

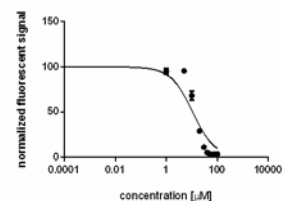

CT-26 LUC cytotoxicity replicate 1

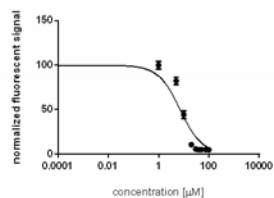

CT-26 LUC cytotoxicity replicate 2

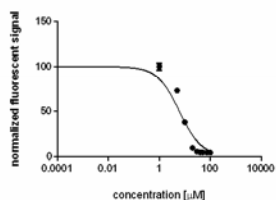

CT-26 LUC cytotoxicity replicate 3

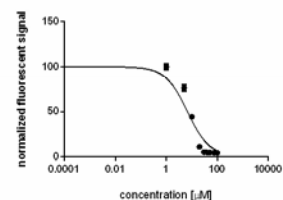

RPE-1 cytotoxicity replicate 1

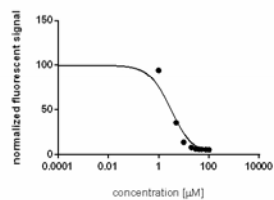

RPE-1 cytotoxicity replicate 2

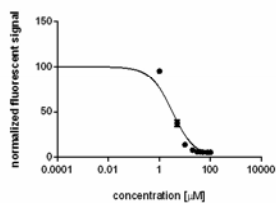

RPE-1 cytotoxicity replicate 3

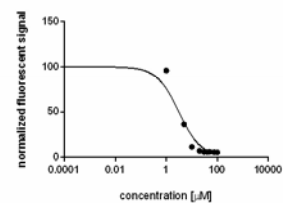

MRC-5 cytotoxicity replicate 1

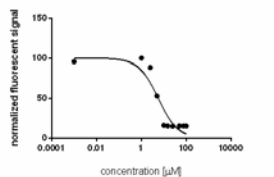

MRC-5 cytotoxicity replicate 2

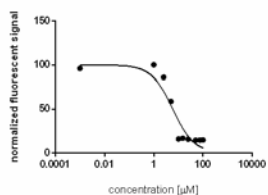

MRC-5 cytotoxicity replicate 3

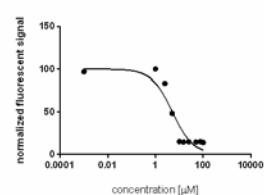

HeLa cytotoxicity replicate 1

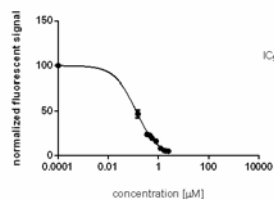

HeLa cytotoxicity replicate 2

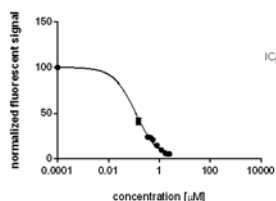

HeLa cytotoxicity replicate 3

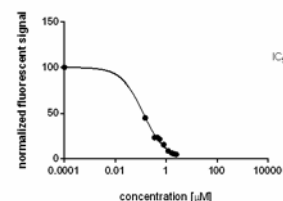

A2780 cytotoxicity replicate 1

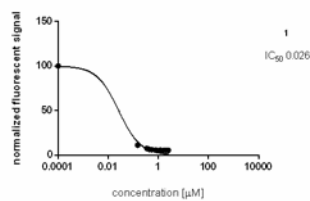

A2780 cytotoxicity replicate 2

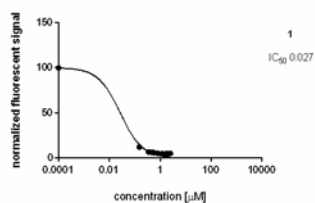

A2780 cytotoxicity replicate 3

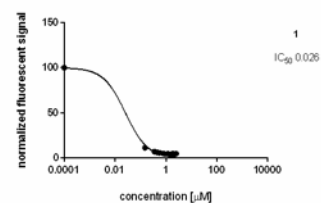

A2780 ADR cytotoxicity replicate 1

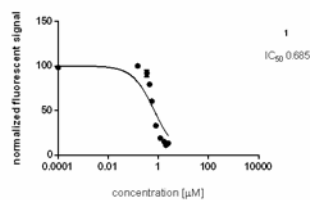

A2780 ADR cytotoxicity replicate 2

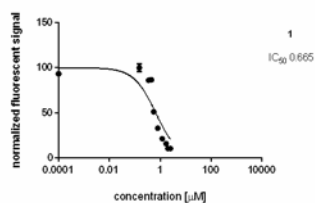

A2780 ADR cytotoxicity replicate 3

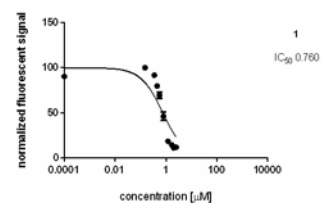

A2780 cis cytotoxicity replicate 1

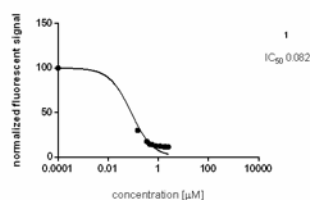

A2780 cis cytotoxicity replicate 2

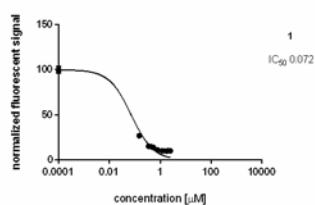

A2780 cis cytotoxicity replicate 3

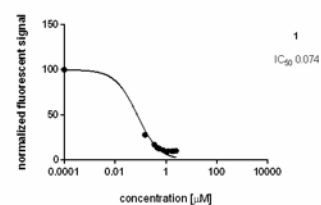

CT-26 cytotoxicity replicate 1

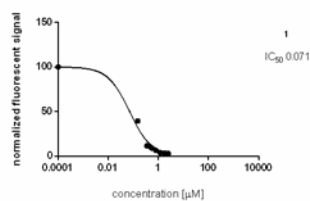

CT-26 cytotoxicity replicate 2

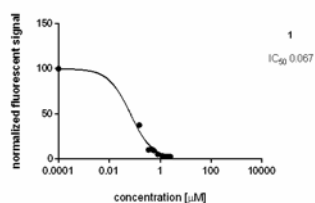

CT-26 cytotoxicity replicate 3

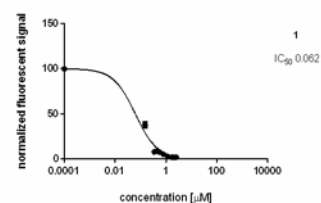

CT-26 LUC cytotoxicity replicate 1

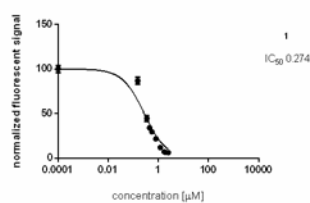

CT-26 LUC cytotoxicity replicate 2

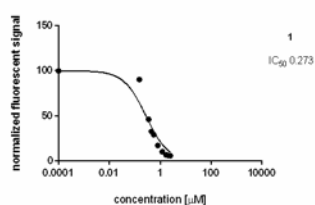

CT-26 LUC cytotoxicity replicate 3

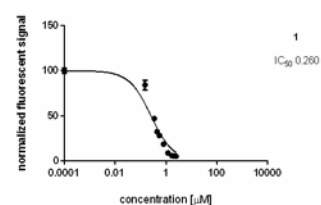

RPE-1 cytotoxicity replicate 1

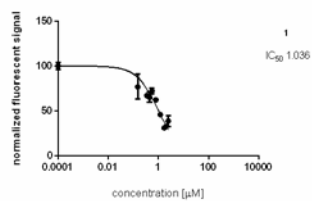

RPE-1 cytotoxicity replicate 2

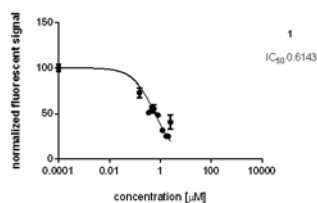

RPE-1 cytotoxicity replicate 3

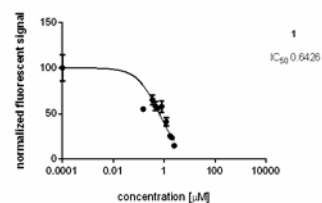

HeLa cytotoxicity replicate 1

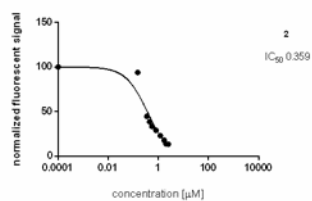

HeLa cytotoxicity replicate 2

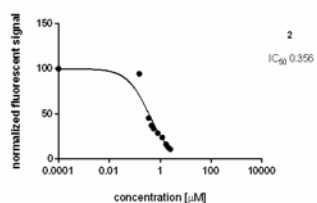

HeLa cytotoxicity replicate 3

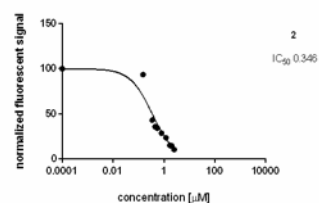

A2780 cytotoxicity replicate 1

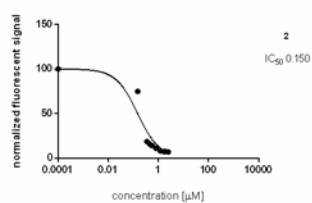

A2780 cytotoxicity replicate 2

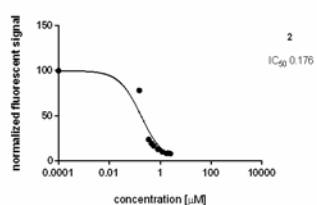

A2780 cytotoxicity replicate 3

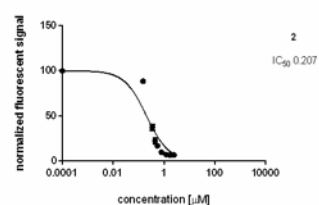

A2780 ADR cytotoxicity replicate 1

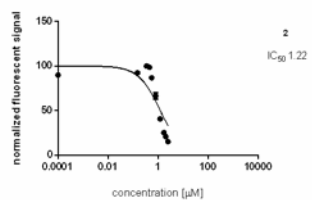

A2780 ADR cytotoxicity replicate 2

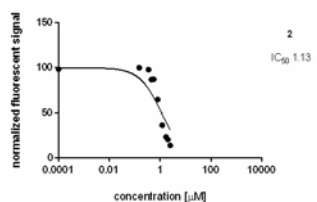

A2780 ADR cytotoxicity replicate 3

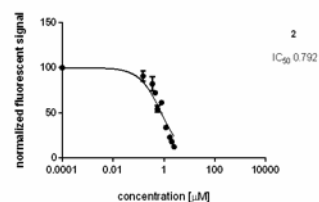

A2780 cis cytotoxicity replicate 1

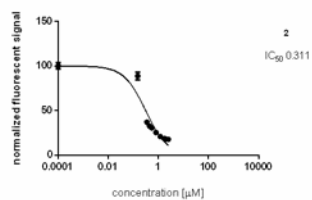

A2780 cis cytotoxicity replicate 2

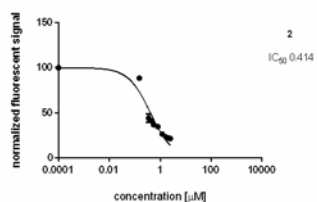

A2780 cis cytotoxicity replicate 3

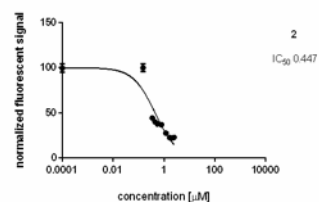

CT-26 cytotoxicity replicate 1

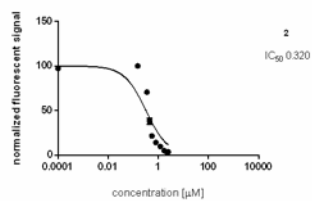

CT-26 cytotoxicity replicate 2

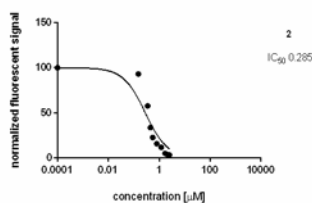

CT-26 cytotoxicity replicate 3

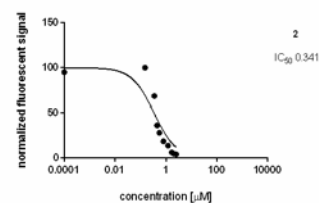

CT-26 LUC cytotoxicity replicate 1

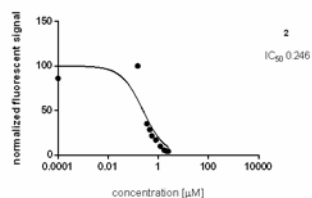

CT-26 LUC cytotoxicity replicate 2

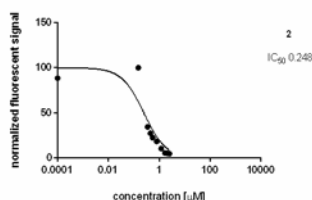

CT-26 LUC cytotoxicity replicate 3

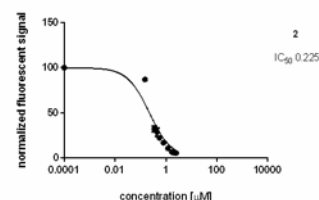

RPE-1 cytotoxicity replicate 1

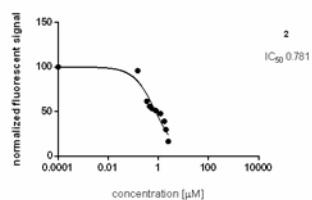

RPE-1 cytotoxicity replicate 2

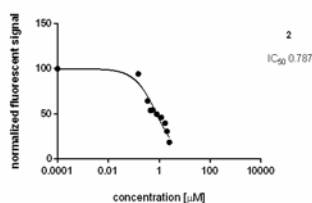

RPE-1 cytotoxicity replicate 3

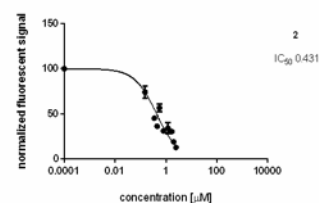

HeLa cytotoxicity replicate 1

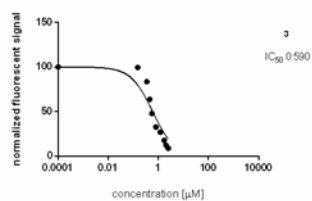

HeLa cytotoxicity replicate 2

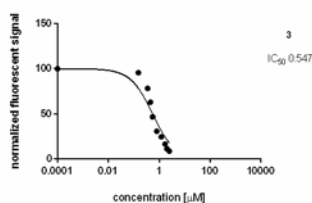

HeLa cytotoxicity replicate 3

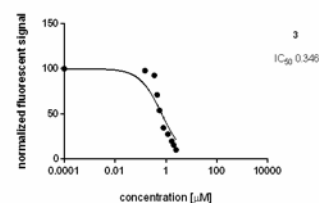

A2780 cytotoxicity replicate 1

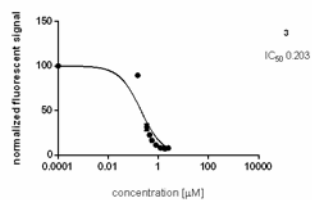

A2780 cytotoxicity replicate 2

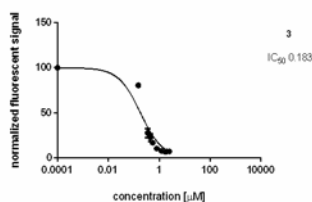

A2780 cytotoxicity replicate 3

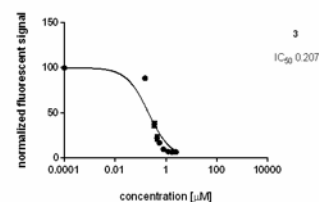



A2780 ADR cytotoxicity replicate 1

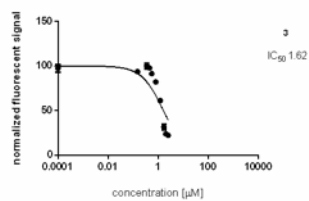

A2780 ADR cytotoxicity replicate 2

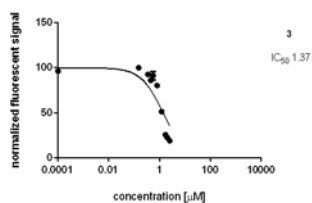

A2780 ADR cytotoxicity replicate 3

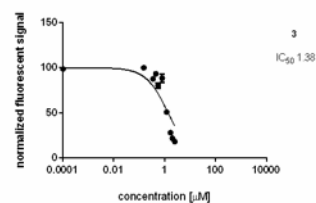

A2780 cis cytotoxicity replicate 1

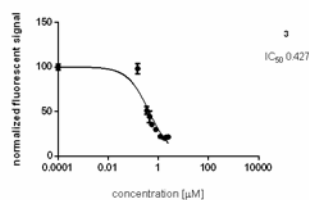

A2780 cis cytotoxicity replicate 2

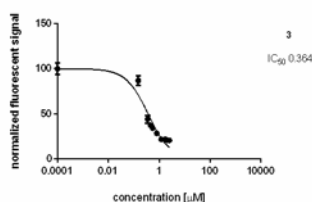

A2780 cis cytotoxicity replicate 3

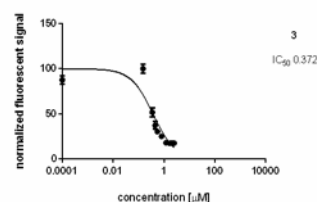

CT-26 cytotoxicity replicate 1

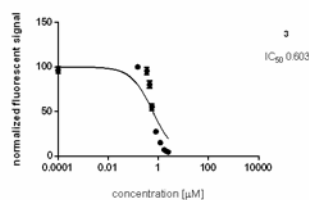

CT-26 cytotoxicity replicate 2

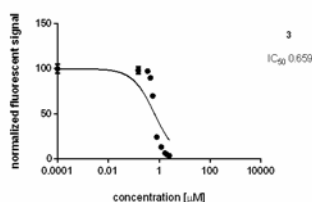

CT-26 cytotoxicity replicate 3

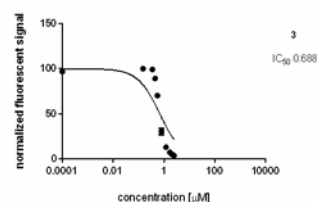

CT-26 LUC cytotoxicity replicate 1

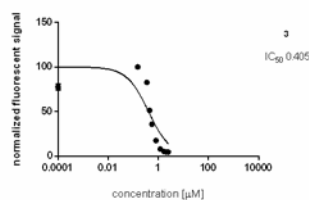

CT-26 LUC cytotoxicity replicate 2

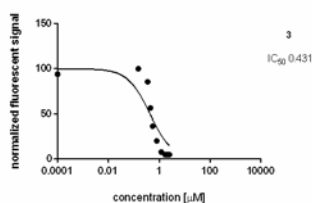

CT-26 LUC cytotoxicity replicate 3

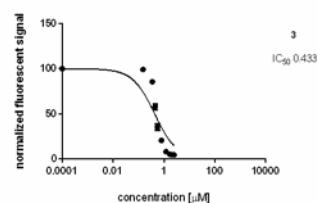

RPE-1 cytotoxicity replicate 1

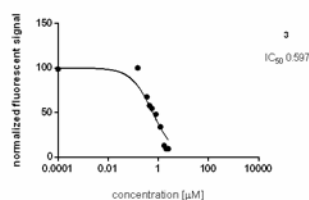

RPE-1 cytotoxicity replicate 2

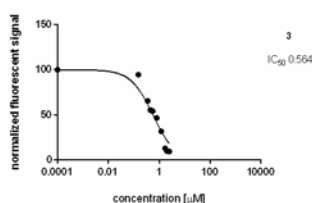

RPE-1 cytotoxicity replicate 3

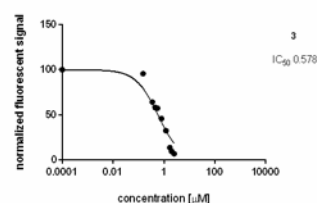

HeLa cytotoxicity replicate 1

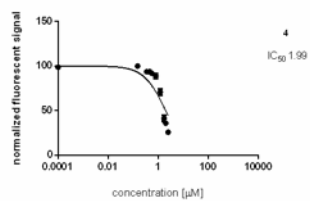

HeLa cytotoxicity replicate 2

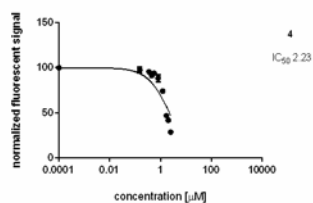

HeLa cytotoxicity replicate 3

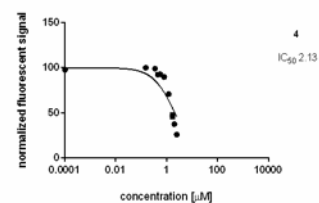

A2780 cytotoxicity replicate 1

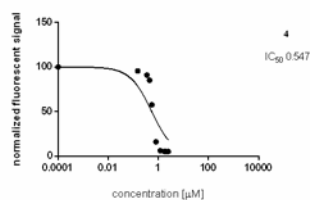

A2780 cytotoxicity replicate 2

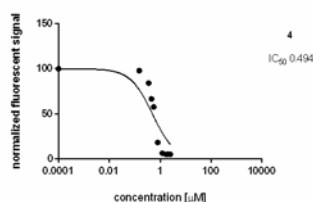

A2780 cytotoxicity replicate 3

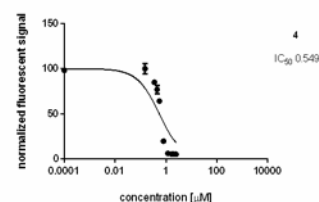

A2780 ADR cytotoxicity replicate 1

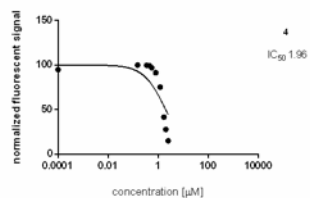

A2780 ADR cytotoxicity replicate 2

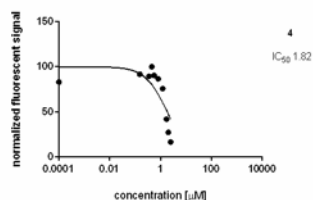

A2780 ADR cytotoxicity replicate 3

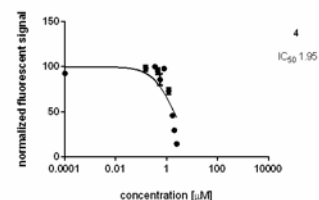

A2780 cis cytotoxicity replicate 1

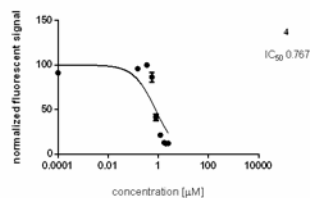

A2780 cis cytotoxicity replicate 2

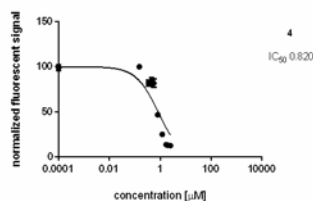

A2780 cis cytotoxicity replicate 3

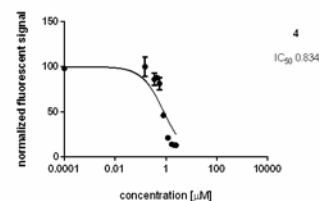

CT-26 cytotoxicity replicate 1

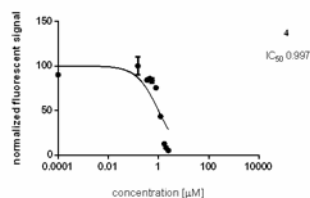

CT-26 cytotoxicity replicate 2

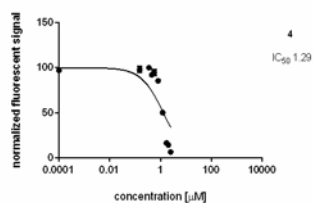

CT-26 cytotoxicity replicate 3

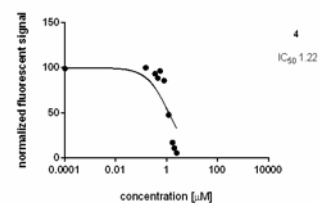

CT-26 LUC cytotoxicity replicate 1

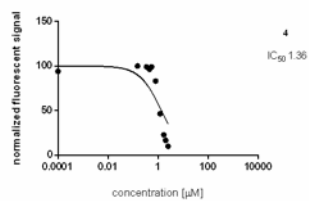

CT-26 LUC cytotoxicity replicate 2

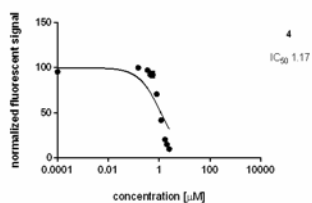

CT-26 LUC cytotoxicity replicate 3

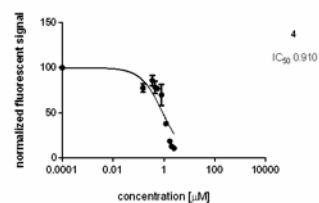

RPE-1 cytotoxicity replicate 1

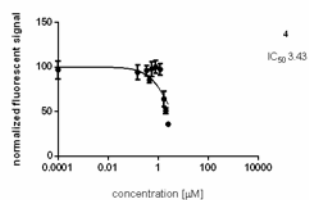

RPE-1 cytotoxicity replicate 2

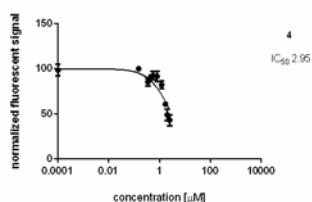

RPE-1 cytotoxicity replicate 3

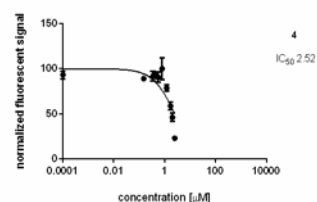

HeLa cytotoxicity replicate 1

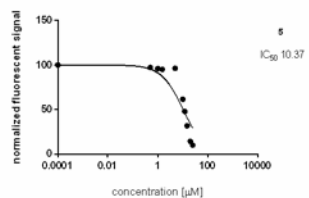

HeLa cytotoxicity replicate 2

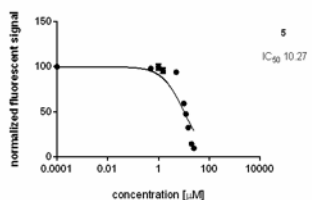

HeLa cytotoxicity replicate 3

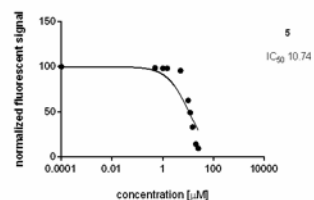

A2780 cytotoxicity replicate 1

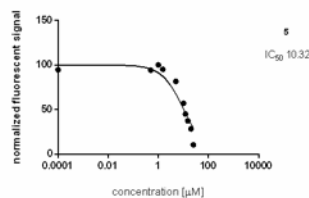

A2780 cytotoxicity replicate 2

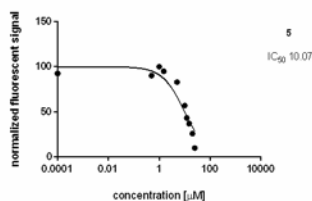

A2780 cytotoxicity replicate 3

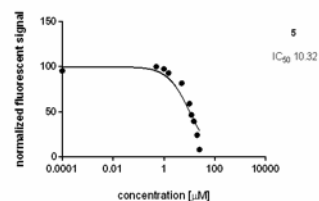

A2780 ADR cytotoxicity replicate 1

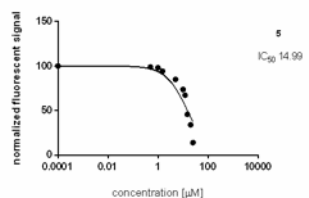

A2780 ADR cytotoxicity replicate 2

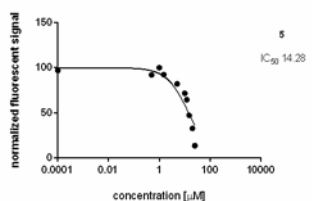

A2780 ADR cytotoxicity replicate 3

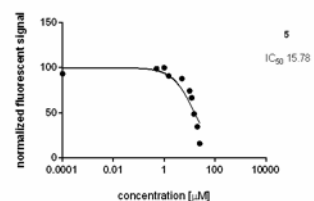

A2780 cis cytotoxicity replicate 1

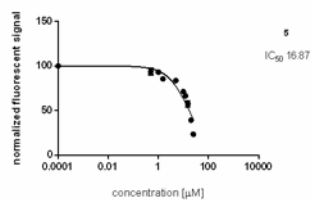

A2780 cis cytotoxicity replicate 2

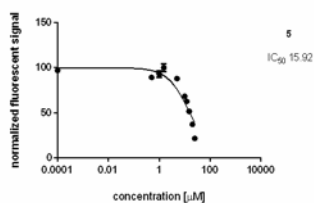

A2780 cis cytotoxicity replicate 3

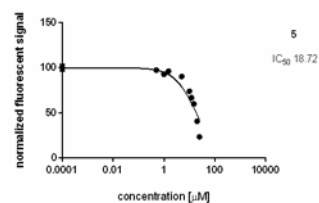

CT-26 cytotoxicity replicate 1

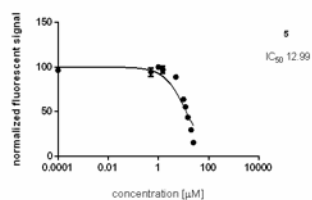

CT-26 cytotoxicity replicate 2

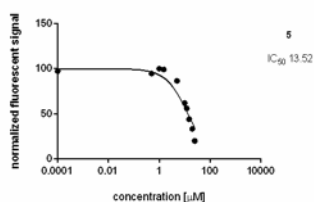

CT-26 cytotoxicity replicate 3

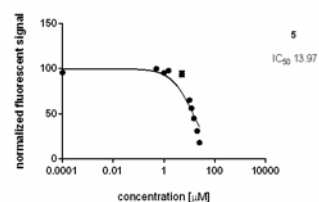

CT-26 LUC cytotoxicity replicate 1

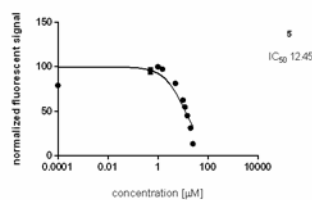

CT-26 LUC cytotoxicity replicate 2

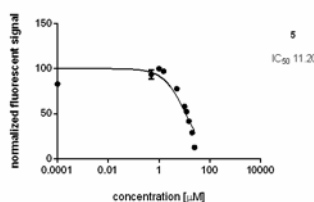

CT-26 LUC cytotoxicity replicate 3

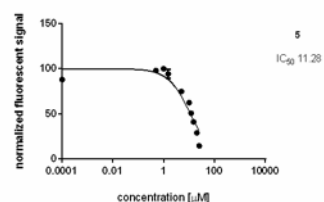

RPE-1 cytotoxicity replicate 1

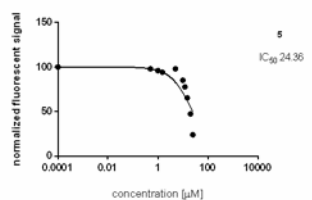

RPE-1 cytotoxicity replicate 2

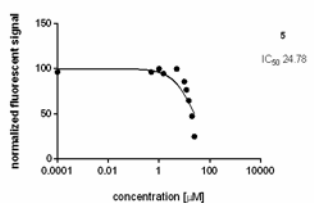

RPE-1 cytotoxicity replicate 3

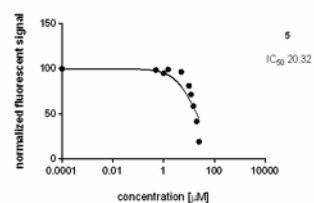

HeLa cytotoxicity replicate 1

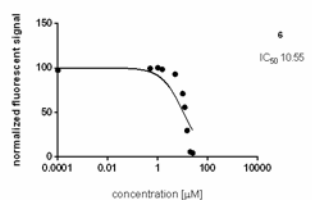

HeLa cytotoxicity replicate 2

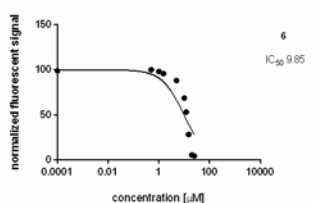

HeLa cytotoxicity replicate 3

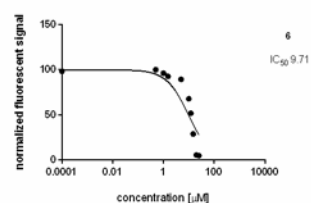

A2780 cytotoxicity replicate 1

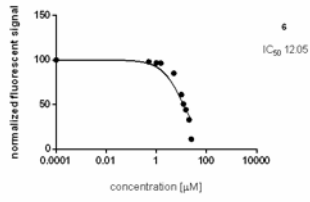

A2780 cytotoxicity replicate 2

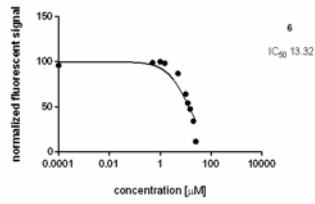

A2780 cytotoxicity replicate 3

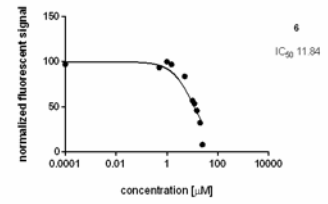

A2780 ADR cytotoxicity replicate 1

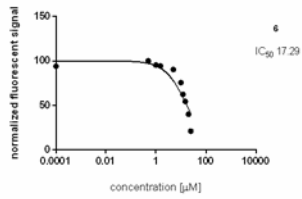

A2780 ADR cytotoxicity replicate 2

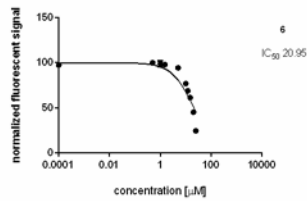

A2780 ADR cytotoxicity replicate 3

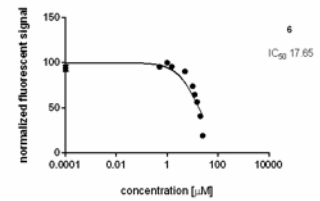

A2780 cis cytotoxicity replicate 1

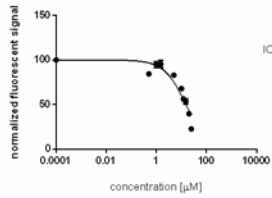

A2780 cis cytotoxicity replicate 2

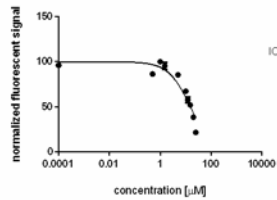

A2780 cis cytotoxicity replicate 3

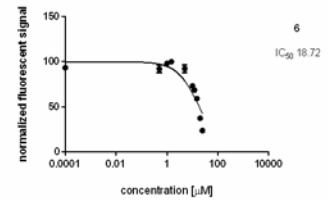

CT-26 cytotoxicity replicate 1

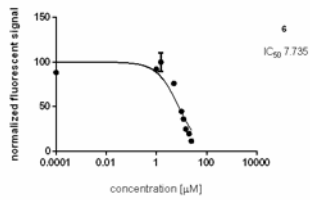

CT-26 cytotoxicity replicate 2

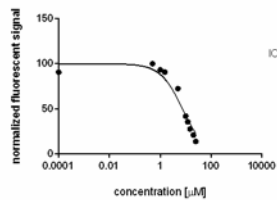

CT-26 cytotoxicity replicate 3

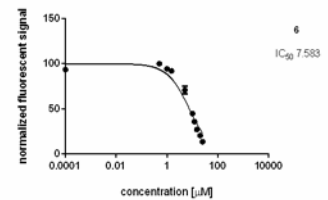

CT-26 LUC cytotoxicity replicate 1

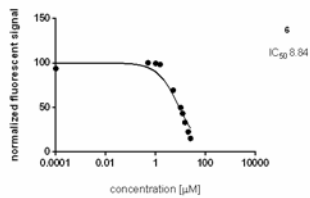

CT-26 LUC cytotoxicity replicate 2

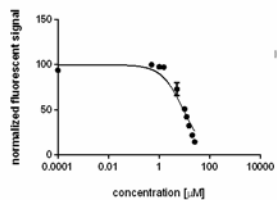

CT-26 LUC cytotoxicity replicate 3

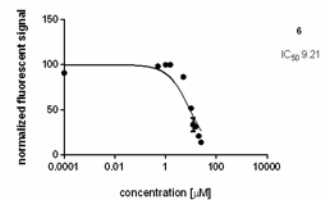

RPE-1 cytotoxicity replicate 1

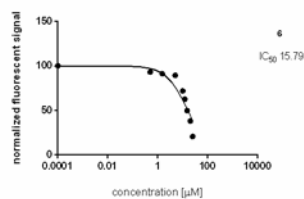

RPE-1 cytotoxicity replicate 2

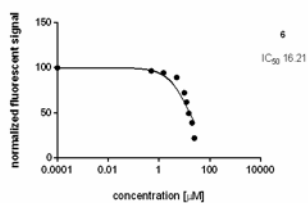

RPE-1 cytotoxicity replicate 3

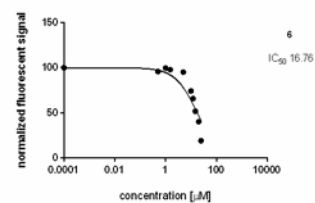

HeLa cytotoxicity replicate 1

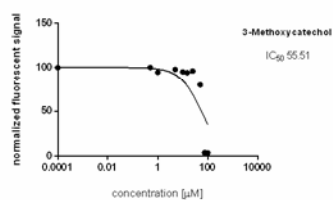

HeLa cytotoxicity replicate 2

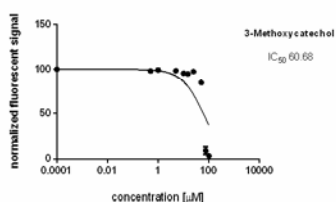

HeLa cytotoxicity replicate 3

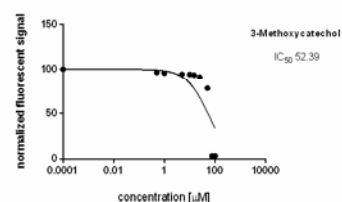

A2780 cytotoxicity replicate 1

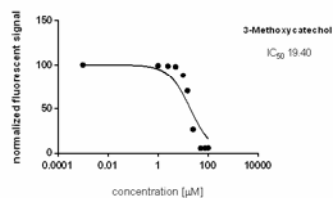

**A2780 cytotoxicity replicate 2**

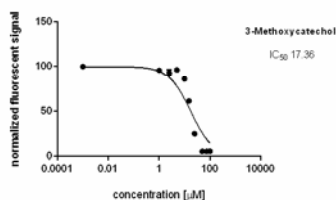

**A2780 cytotoxicity replicate 3**

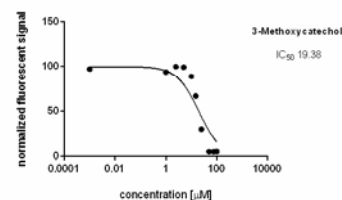

A2780 ADR cytotoxicity replicate 1

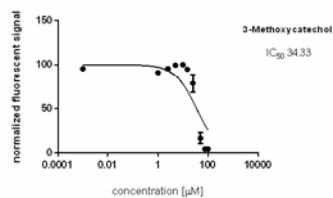

A2780 ADR cytotoxicity replicate 2

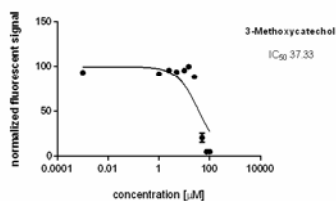

A2780 ADR cytotoxicity replicate 3

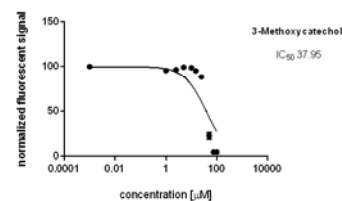

**A2780 cis cytotoxicity replicate 1**

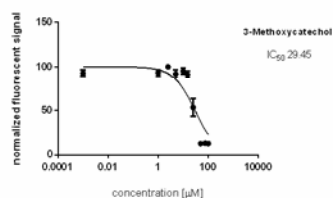

**A2780 cis cytotoxicity replicate 2**

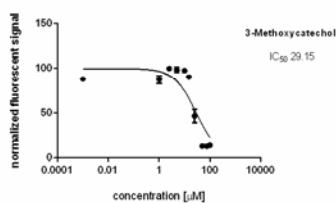

A2780 cis cytotoxicity replicate 3

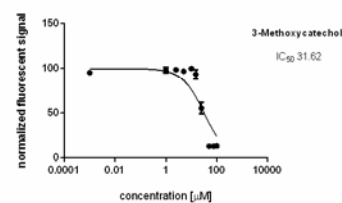

CT-26 cytotoxicity replicate 1

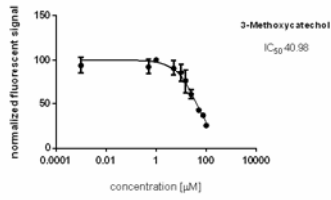

CT-26 cytotoxicity replicate 2

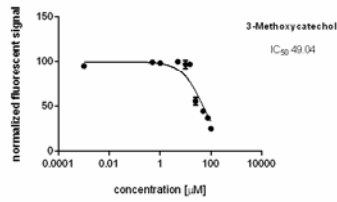

CT-26 cytotoxicity replicate 3

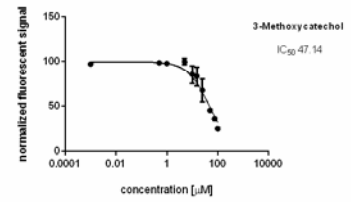

CT-26 LUC cytotoxicity replicate 1

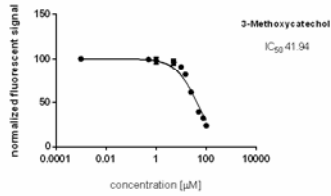

CT-26 LUC cytotoxicity replicate 2

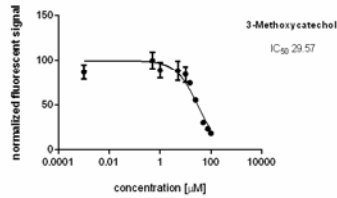

CT-26 LUC cytotoxicity replicate 3

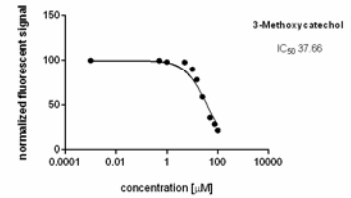

RPE-1 cytotoxicity replicate 1

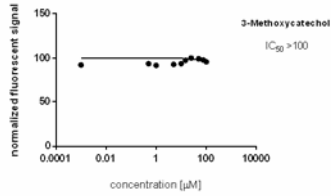

RPE-1 cytotoxicity replicate 2

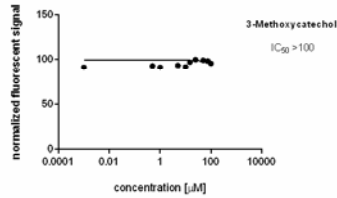

RPE-1 cytotoxicity replicate 3

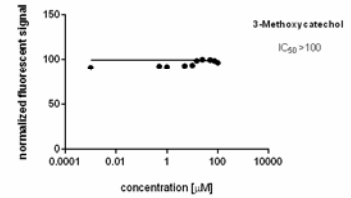

HeLa cytotoxicity replicate 1

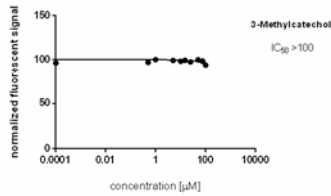

HeLa cytotoxicity replicate 2

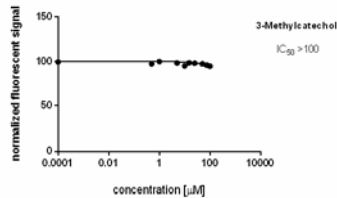

HeLa cytotoxicity replicate 3

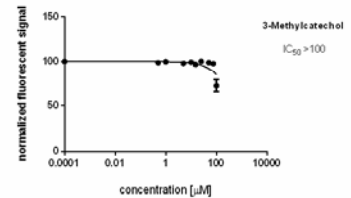

A2780 cytotoxicity replicate 1

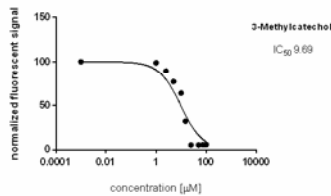

A2780 cytotoxicity replicate 2

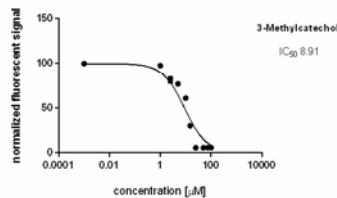

A2780 cytotoxicity replicate 3

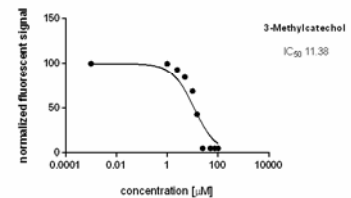

A2780 ADR cytotoxicity replicate 1

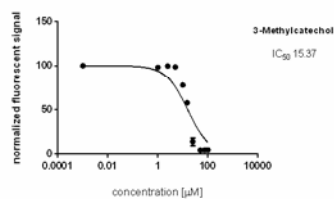

A2780 ADR cytotoxicity replicate 2

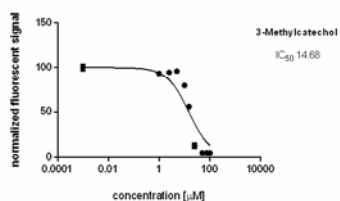

A2780 ADR cytotoxicity replicate 3

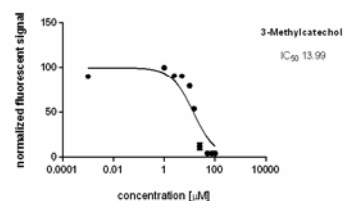

A2780 cis cytotoxicity replicate 1

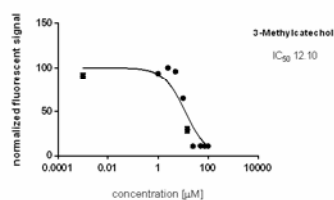

A2780 cis cytotoxicity replicate 2

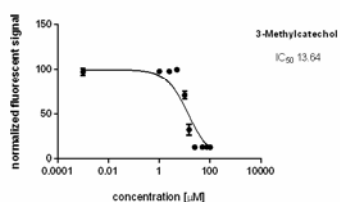

A2780 cis cytotoxicity replicate 3

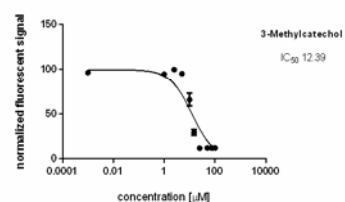

CT-26 cytotoxicity replicate 1

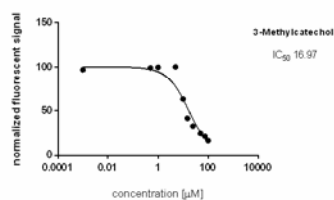

CT-26 cytotoxicity replicate 2

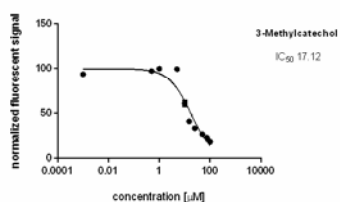

CT-26 cytotoxicity replicate 3

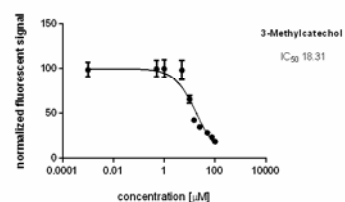

CT-26 LUC cytotoxicity replicate 1

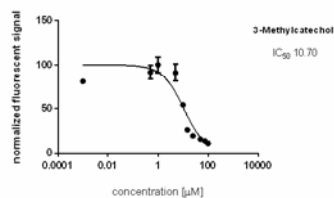

CT-26 LUC cytotoxicity replicate 2

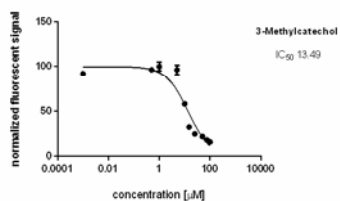

CT-26 LUC cytotoxicity replicate 3

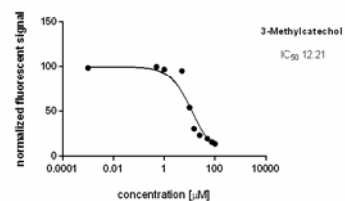

RPE-1 cytotoxicity replicate 1

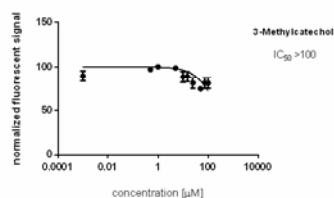

RPE-1 cytotoxicity replicate 2

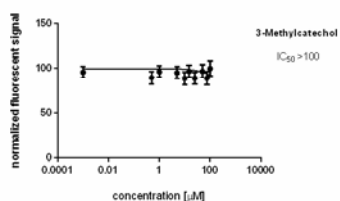

RPE-1 cytotoxicity replicate 3

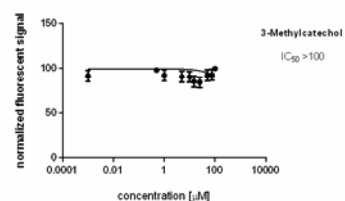



HeLa cytotoxicity replicate 1

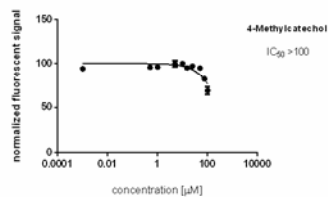

HeLa cytotoxicity replicate 2

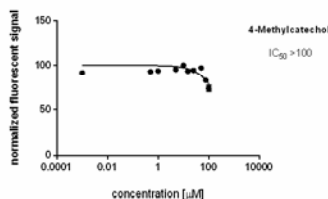

HeLa cytotoxicity replicate 3

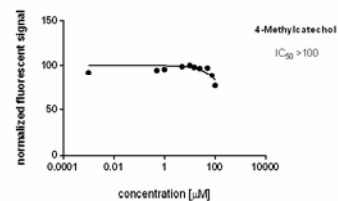

A2780 cytotoxicity replicate 1

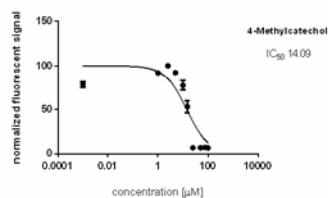

A2780 cytotoxicity replicate 2

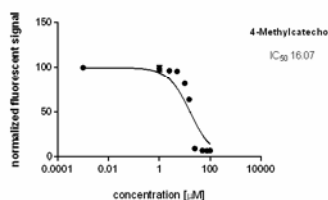

A2780 cytotoxicity replicate 3

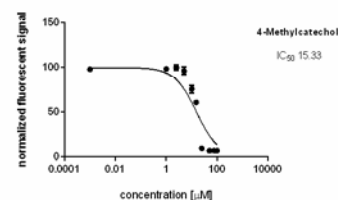

A2780 ADR cytotoxicity replicate 1

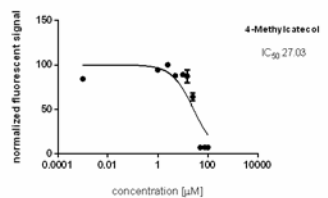

A2780 ADR cytotoxicity replicate 2

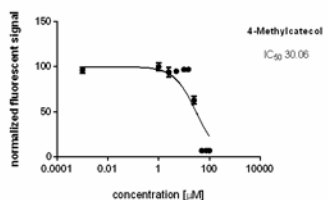

A2780 ADR cytotoxicity replicate 3

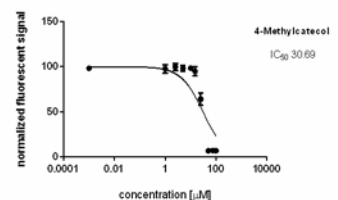

A2780 cis cytotoxicity replicate 1

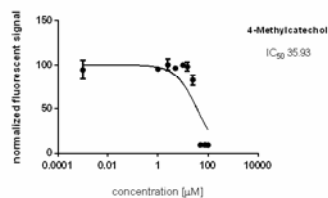

A2780 cis cytotoxicity replicate 2

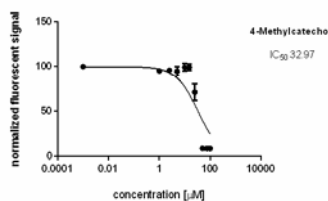

A2780 cis cytotoxicity replicate 3

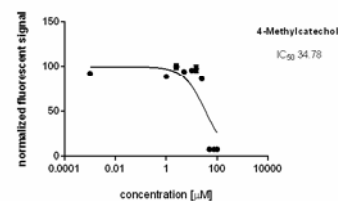

CT-26 cytotoxicity replicate 1

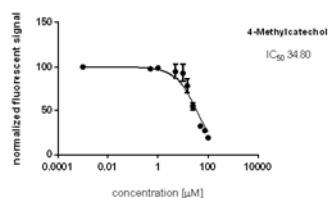

CT-26 cytotoxicity replicate 2

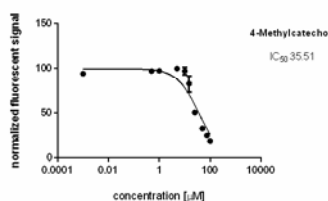

CT-26 cytotoxicity replicate 3

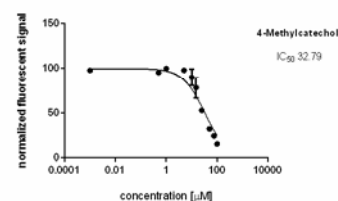

CT-26 LUC cytotoxicity replicate 1

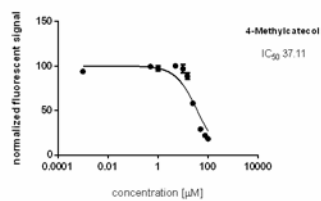

CT-26 LUC cytotoxicity replicate 2

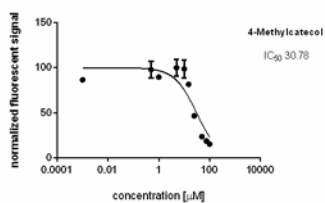

CT-26 LUC cytotoxicity replicate 3

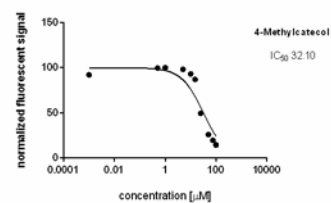

RPE-1 cytotoxicity replicate 1

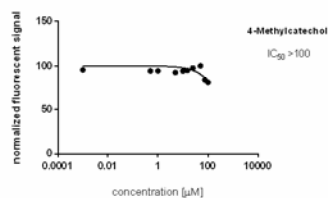

RPE-1 cytotoxicity replicate 2

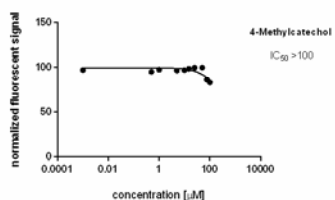

RPE-1 cytotoxicity replicate 3

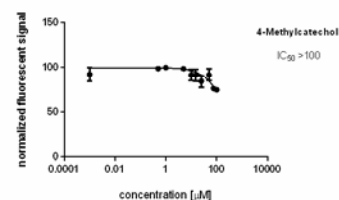

HeLa cytotoxicity replicate 1

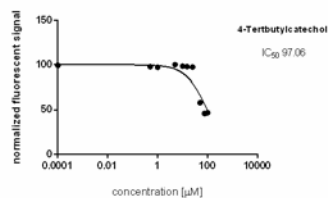

HeLa cytotoxicity replicate 2

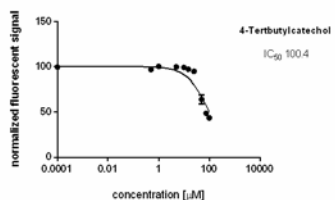

HeLa cytotoxicity replicate 3

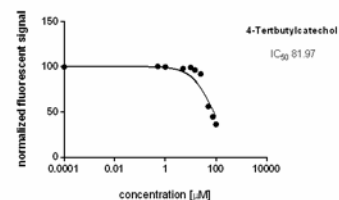

A2780 cytotoxicity replicate 1

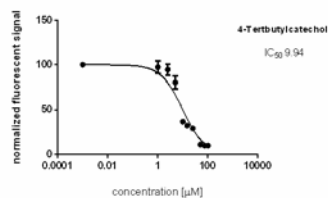

A2780 cytotoxicity replicate 2

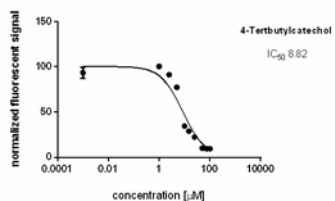

A2780 cytotoxicity replicate 3

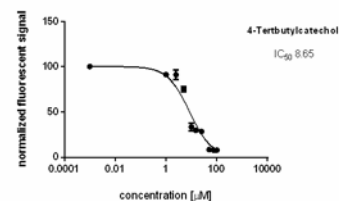

A2780 ADR cytotoxicity replicate 1

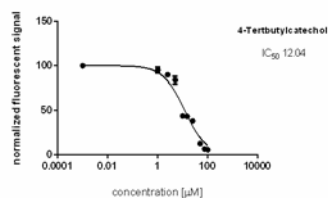

A2780 ADR cytotoxicity replicate 2

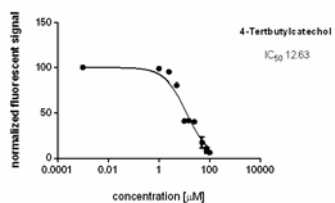

A2780 ADR cytotoxicity replicate 3

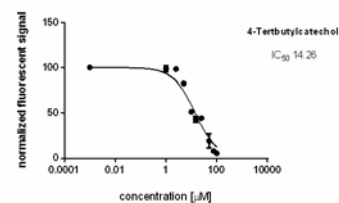

A2780 cis cytotoxicity replicate 1

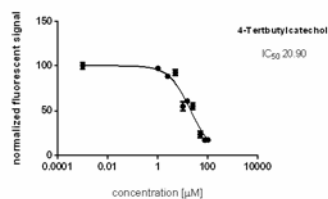

A2780 cis cytotoxicity replicate 2

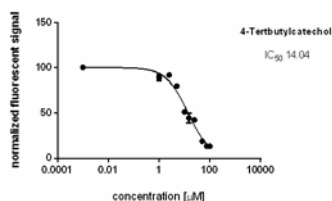

A2780 cis cytotoxicity replicate 3

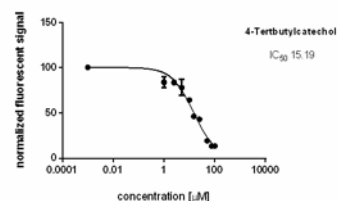

CT-26 cytotoxicity replicate 1

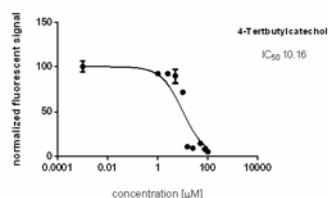

CT-26 cytotoxicity replicate 2

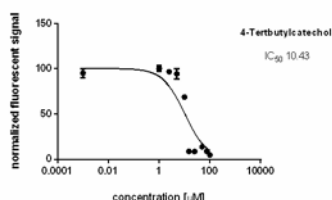

CT-26 cytotoxicity replicate 3

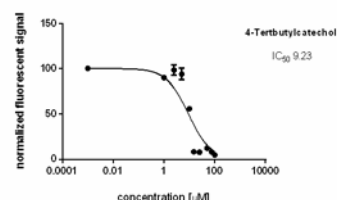

CT-26 LUC cytotoxicity replicate 1

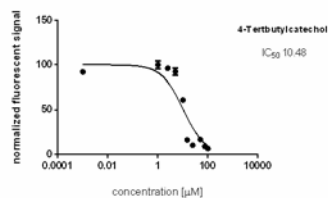

CT-26 LUC cytotoxicity replicate 2

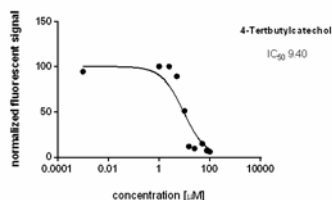

CT-26 LUC cytotoxicity replicate 3

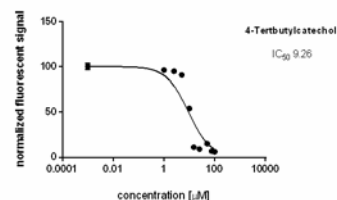

RPE-1 cytotoxicity replicate 1

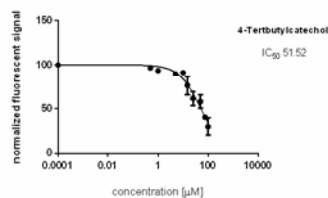

RPE-1 cytotoxicity replicate 2

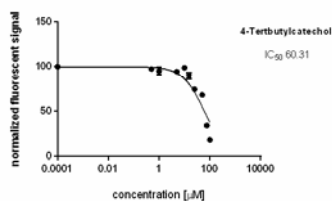

RPE-1 cytotoxicity replicate 3

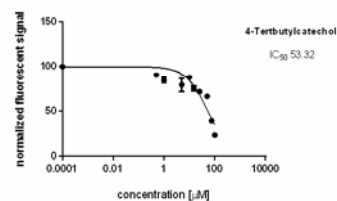

HeLa cytotoxicity replicate 1

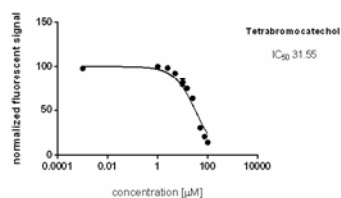

HeLa cytotoxicity replicate 2

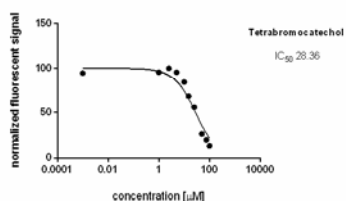

HeLa cytotoxicity replicate 3

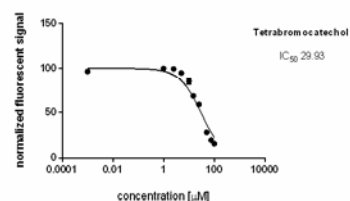

A2780 cytotoxicity replicate 1

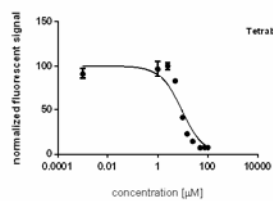

A2780 cytotoxicity replicate 2

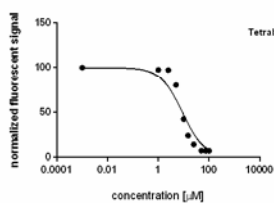

A2780 cytotoxicity replicate 3

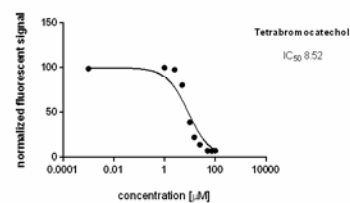

A2780 ADR cytotoxicity replicate 1

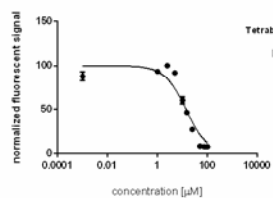

A2780 ADR cytotoxicity replicate 2

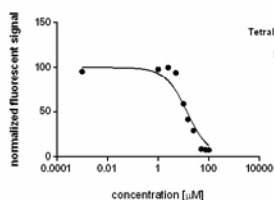

A2780 ADR cytotoxicity replicate 3

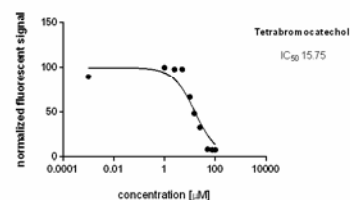

A2780 cis cytotoxicity replicate 1

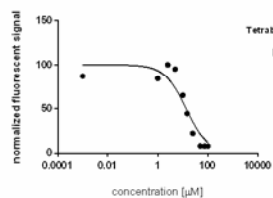

A2780 cis cytotoxicity replicate 2

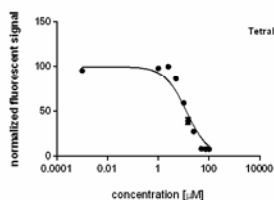

A2780 cis cytotoxicity replicate 3

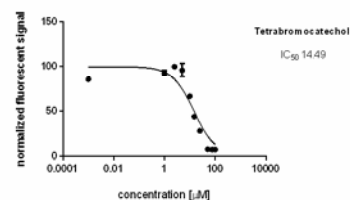

CT-26 cytotoxicity replicate 1

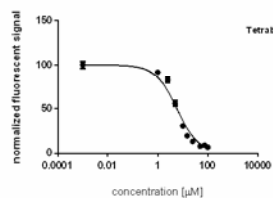

CT-26 cytotoxicity replicate 2

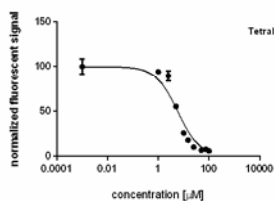

CT-26 cytotoxicity replicate 3

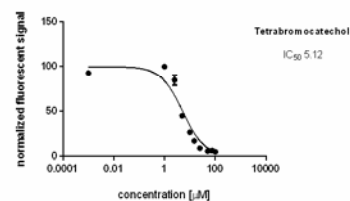

CT-26 LUC cytotoxicity replicate 1

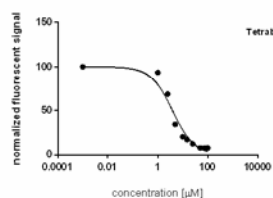

CT-26 LUC cytotoxicity replicate 2

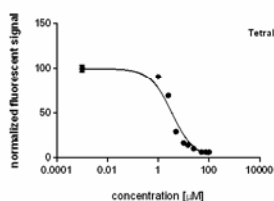

CT-26 LUC cytotoxicity replicate 3

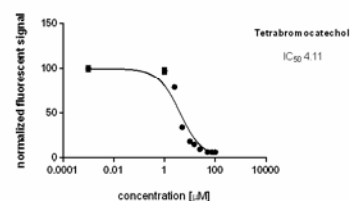

RPE-1 cytotoxicity replicate 1

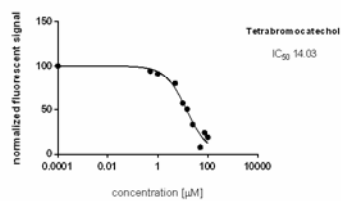

RPE-1 cytotoxicity replicate 2

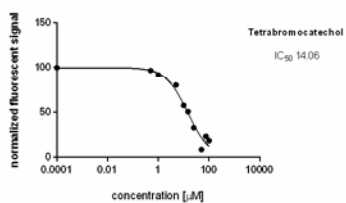

RPE-1 cytotoxicity replicate 3

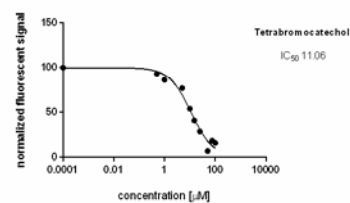

HeLa cytotoxicity replicate 1

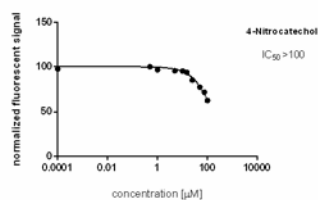

HeLa cytotoxicity replicate 2

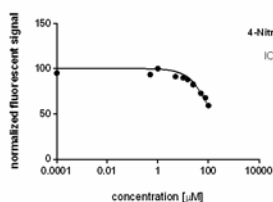

HeLa cytotoxicity replicate 3

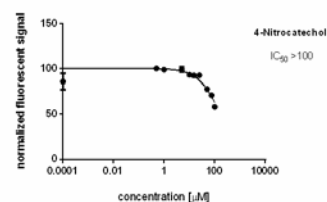

A2780 cytotoxicity replicate 1

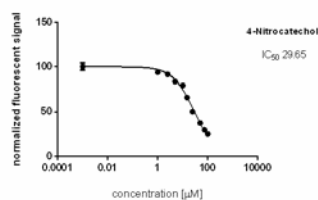

A2780 cytotoxicity replicate 2

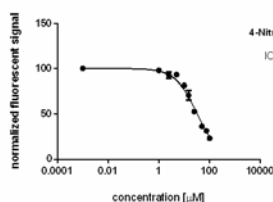

A2780 cytotoxicity replicate 3

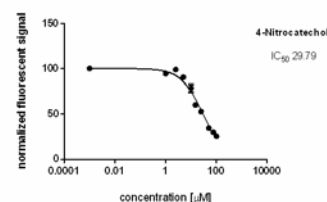

A2780 ADR cytotoxicity replicate 1

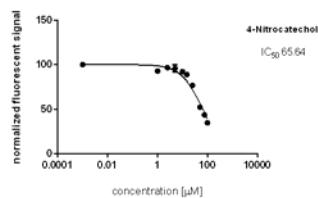

A2780 ADR cytotoxicity replicate 2

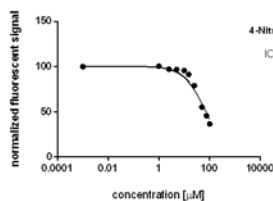

A2780 ADR cytotoxicity replicate 3

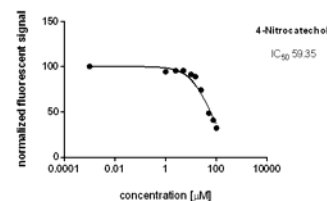

A2780 cis cytotoxicity replicate 1

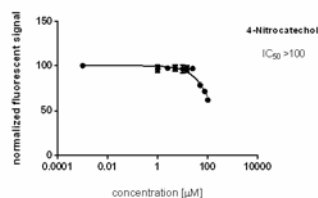

A2780 cis cytotoxicity replicate 2

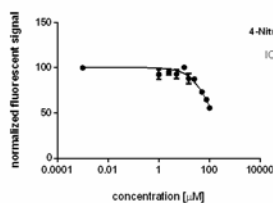

A2780 cis cytotoxicity replicate 3

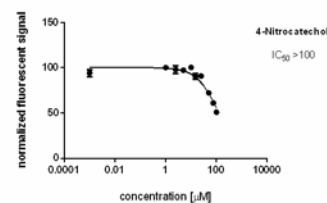

CT-26 cytotoxicity replicate 1

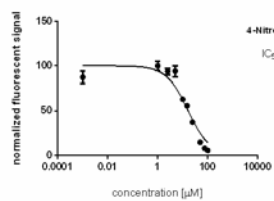

CT-26 cytotoxicity replicate 2

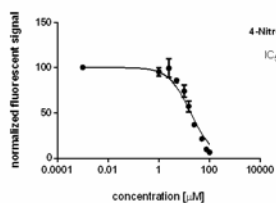

CT-26 cytotoxicity replicate 3

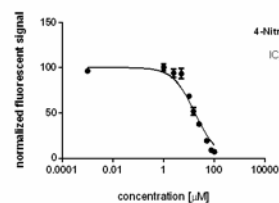

CT-26 LUC cytotoxicity replicate 1

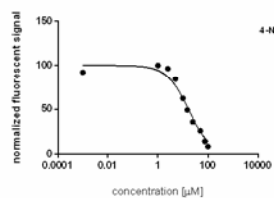

CT-26 LUC cytotoxicity replicate 2

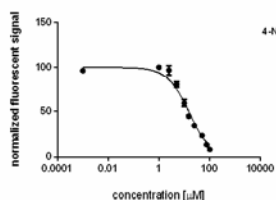

CT-26 LUC cytotoxicity replicate 3

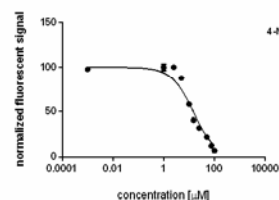

RPE-1 cytotoxicity replicate 1

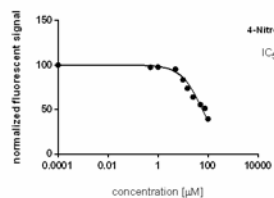

RPE-1 cytotoxicity replicate 2

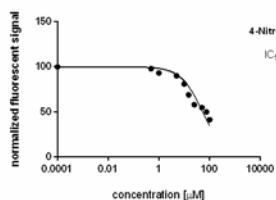

RPE-1 cytotoxicity replicate 3

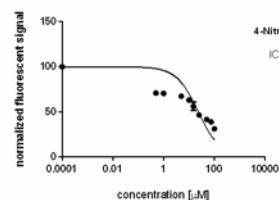

HEK293 cytotoxicity replicate 1

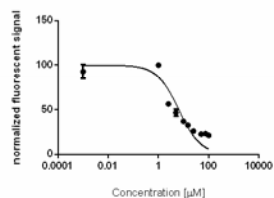

HEK293 cytotoxicity replicate 2

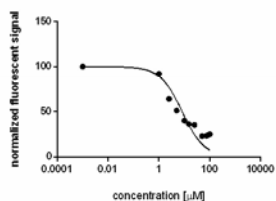

HEK293 cytotoxicity replicate 3

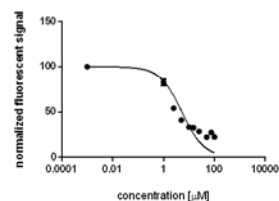

HEK293 cytotoxicity replicate 1

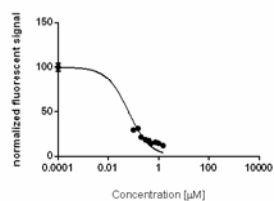

HEK293 cytotoxicity replicate 2

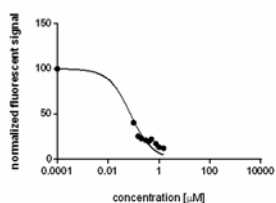

HEK293 cytotoxicity replicate 3

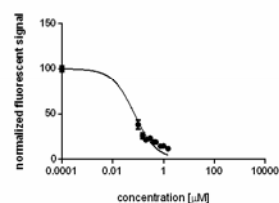

HEK293 cytotoxicity replicate 1

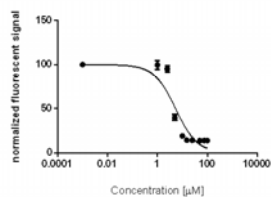

HEK293 cytotoxicity replicate 2

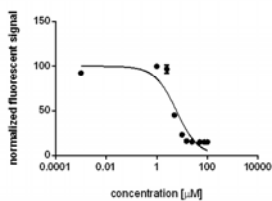

HEK293 cytotoxicity replicate 3

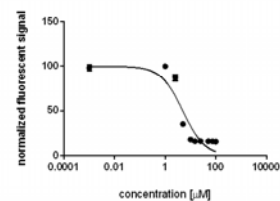

HEK293 cytotoxicity replicate 1

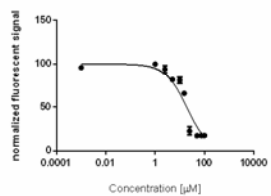

HEK293 cytotoxicity replicate 2

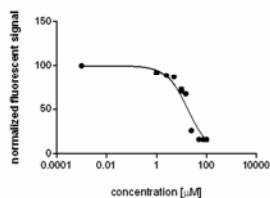

HEK293 cytotoxicity replicate 3

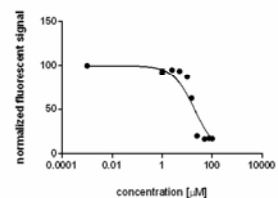

HEK293 cytotoxicity replicate 1

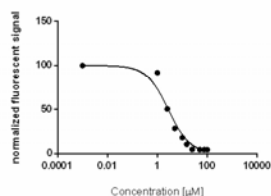

HEK293 cytotoxicity replicate 2

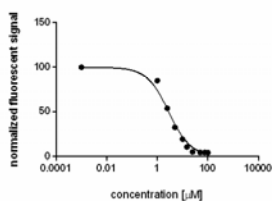

HEK293 cytotoxicity replicate 3

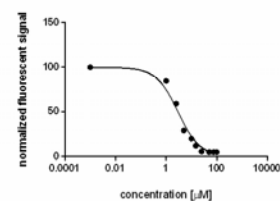

HEK293 cytotoxicity replicate 1

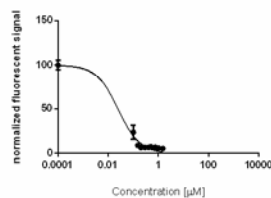

HEK293 cytotoxicity replicate 2

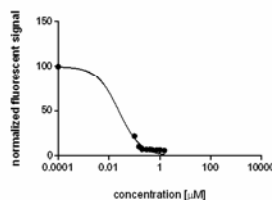

HEK293 cytotoxicity replicate 3

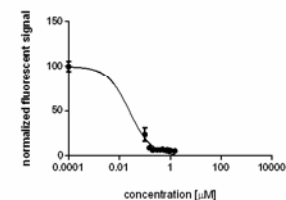

HEK293 cytotoxicity replicate 1

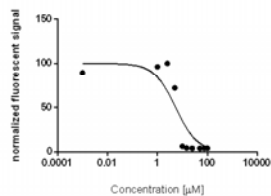

HEK293 cytotoxicity replicate 2

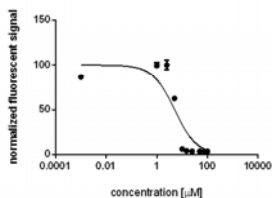

HEK293 cytotoxicity replicate 3

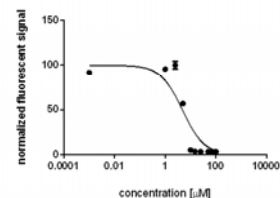

HEK293 cytotoxicity replicate 1

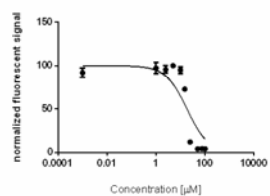

HEK293 cytotoxicity replicate 2

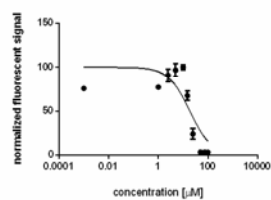

HEK293 cytotoxicity replicate 3

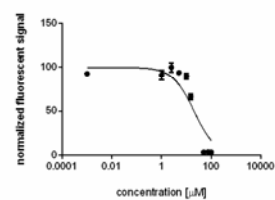



13) **Table S5.** IC<sub>50</sub> values for 3-methoxycatechol, 3-methylcatechol, 4-methylcatechol, 4-tertbutylcatechol, tetrabromocatechol and 4-nitrocatechol.

| IC <sub>50</sub> (μM)      | HeLa         | A2780        | A2780 ADR    | A2780 cis    | CT-26        | CT-26 LUC    | RPE-1        |
|----------------------------|--------------|--------------|--------------|--------------|--------------|--------------|--------------|
| <b>3-methoxycatechol</b>   | 56.19 ± 4.18 | 18.71 ± 1.17 | 36.54 ± 1.94 | 30.07 ± 1.35 | 45.72 ± 4.21 | 36.39 ± 6.28 | >100         |
| <b>3-methylcatechol</b>    | >100         | 9.99 ± 1.26  | 14.68 ± 0.69 | 12.71 ± 0.82 | 17.47 ± 0.73 | 12.13 ± 1.40 | >100         |
| <b>4-methylcatechol</b>    | >100         | 15.16 ± 1.0  | 29.27 ± 1.96 | 34.56 ± 1.49 | 34.37 ± 1.41 | 33.33 ± 3.4  | >100         |
| <b>4-tertbutylcatechol</b> | 93.14 ± 9.8  | 9.14 ± 0.7   | 12.89 ± 1.20 | 16.71 ± 3.67 | 9.94 ± 0.63  | 9.72 ± 0.67  | 55.05 ± 4.64 |
| <b>Tetrabromocatechol</b>  | 29.95 ± 1.60 | 8.75 ± 0.20  | 14.39 ± 1.18 | 13.63 ± 0.88 | 5.53 ± 0.37  | 3.80 ± 0.34  | 13.5 ± 1.7   |
| <b>4-nitrocatechol</b>     | >100         | 30.90 ± 2.05 | 65.86 ± 6.62 | >100         | 17.46 ± 1.02 | 15.31 ± 1.0  | 45 ± 19      |

# 14) Figure S9. CellTiter Glo® viability Test

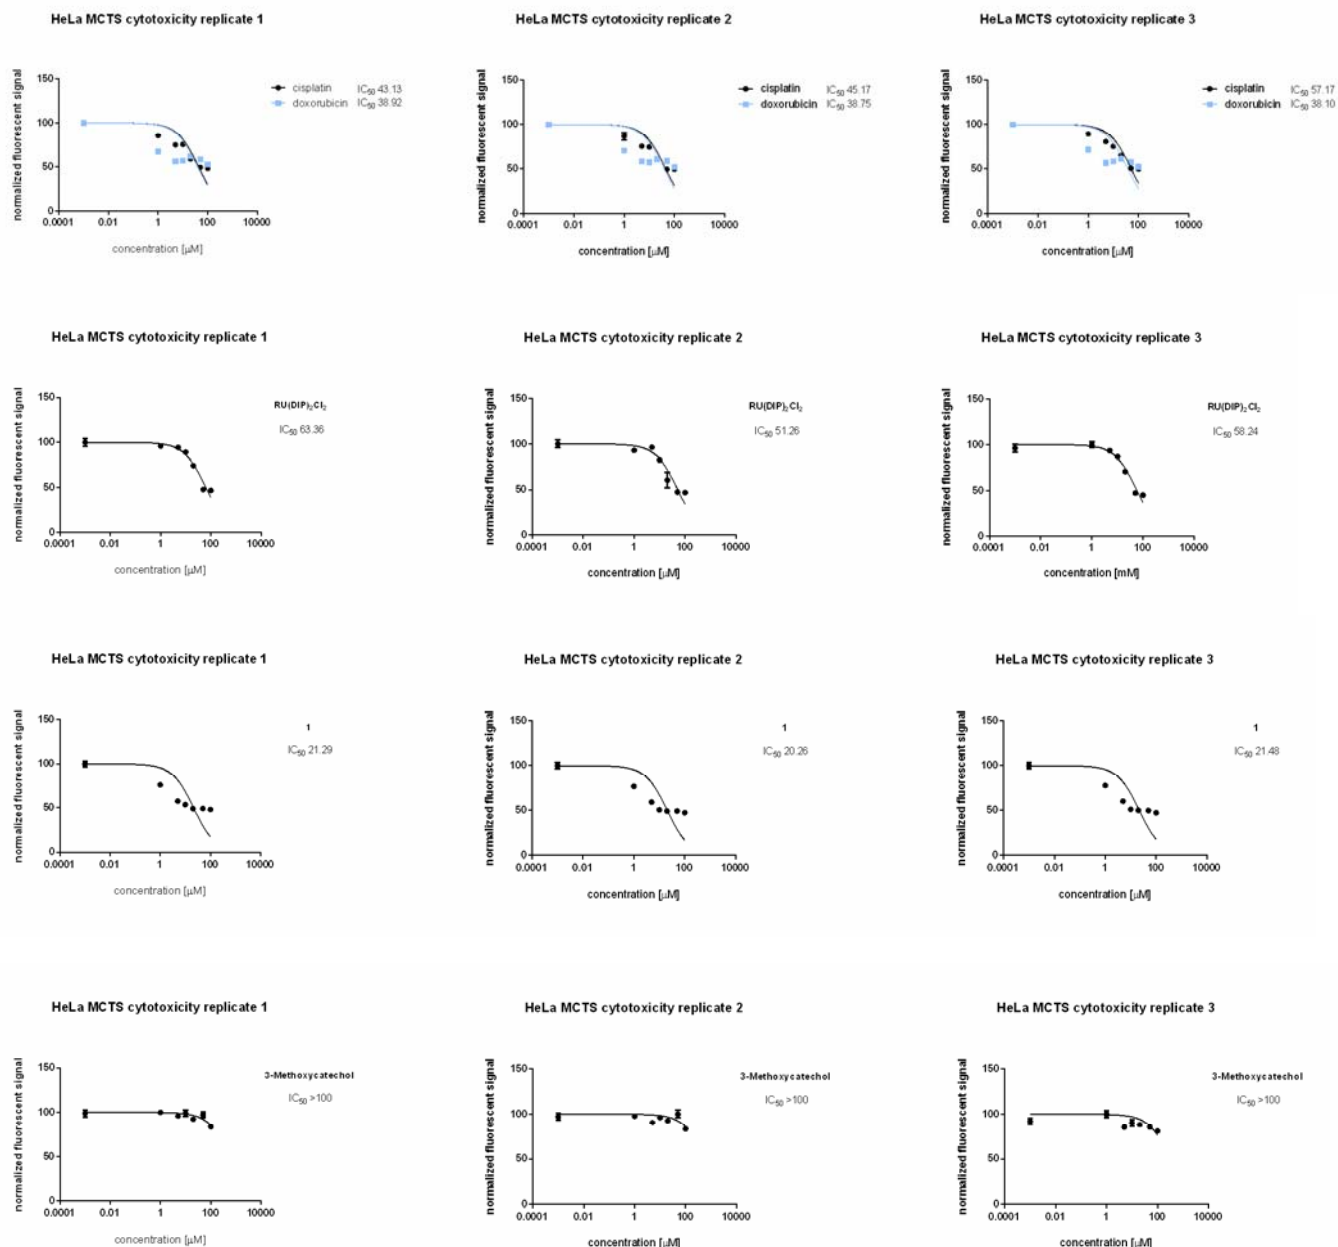

15) **Figure S10.** Cell Death Mechanism: Dot plots of staurosporin (a) and complex **1** (b) after 30 min, 4 h and 24 h treatment.

a)

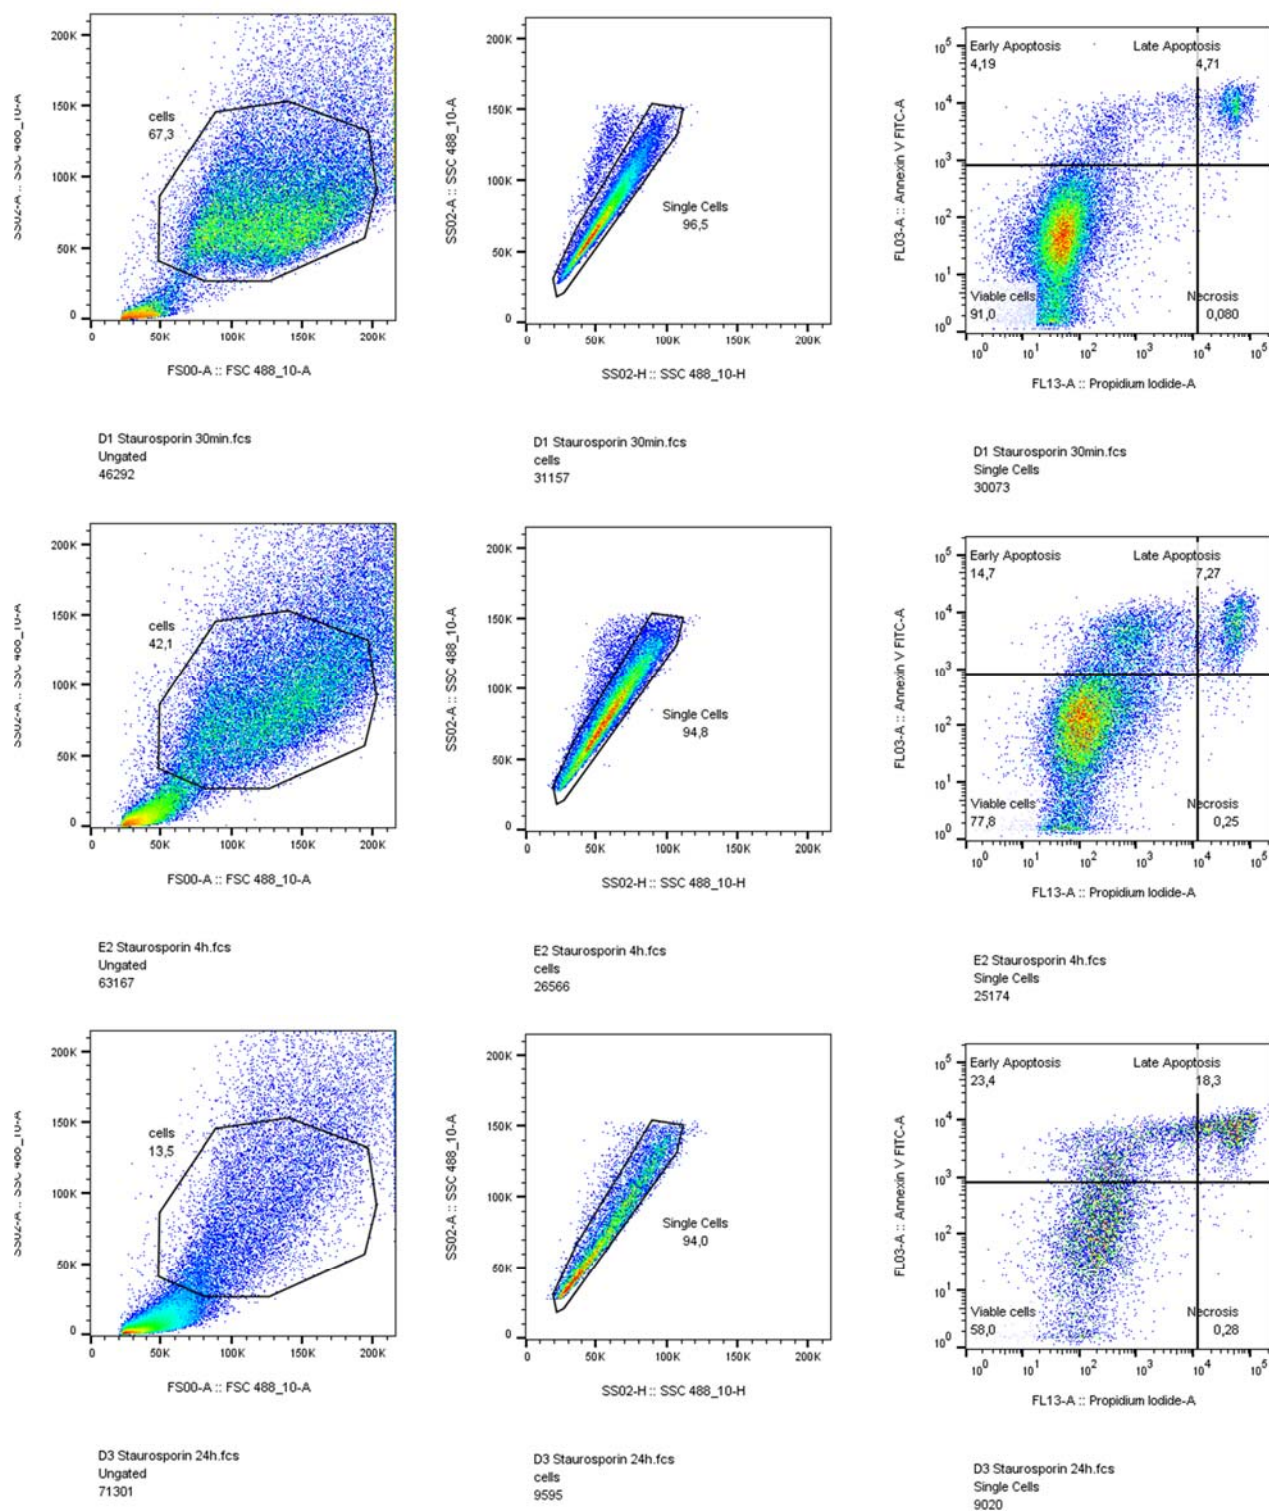

b)

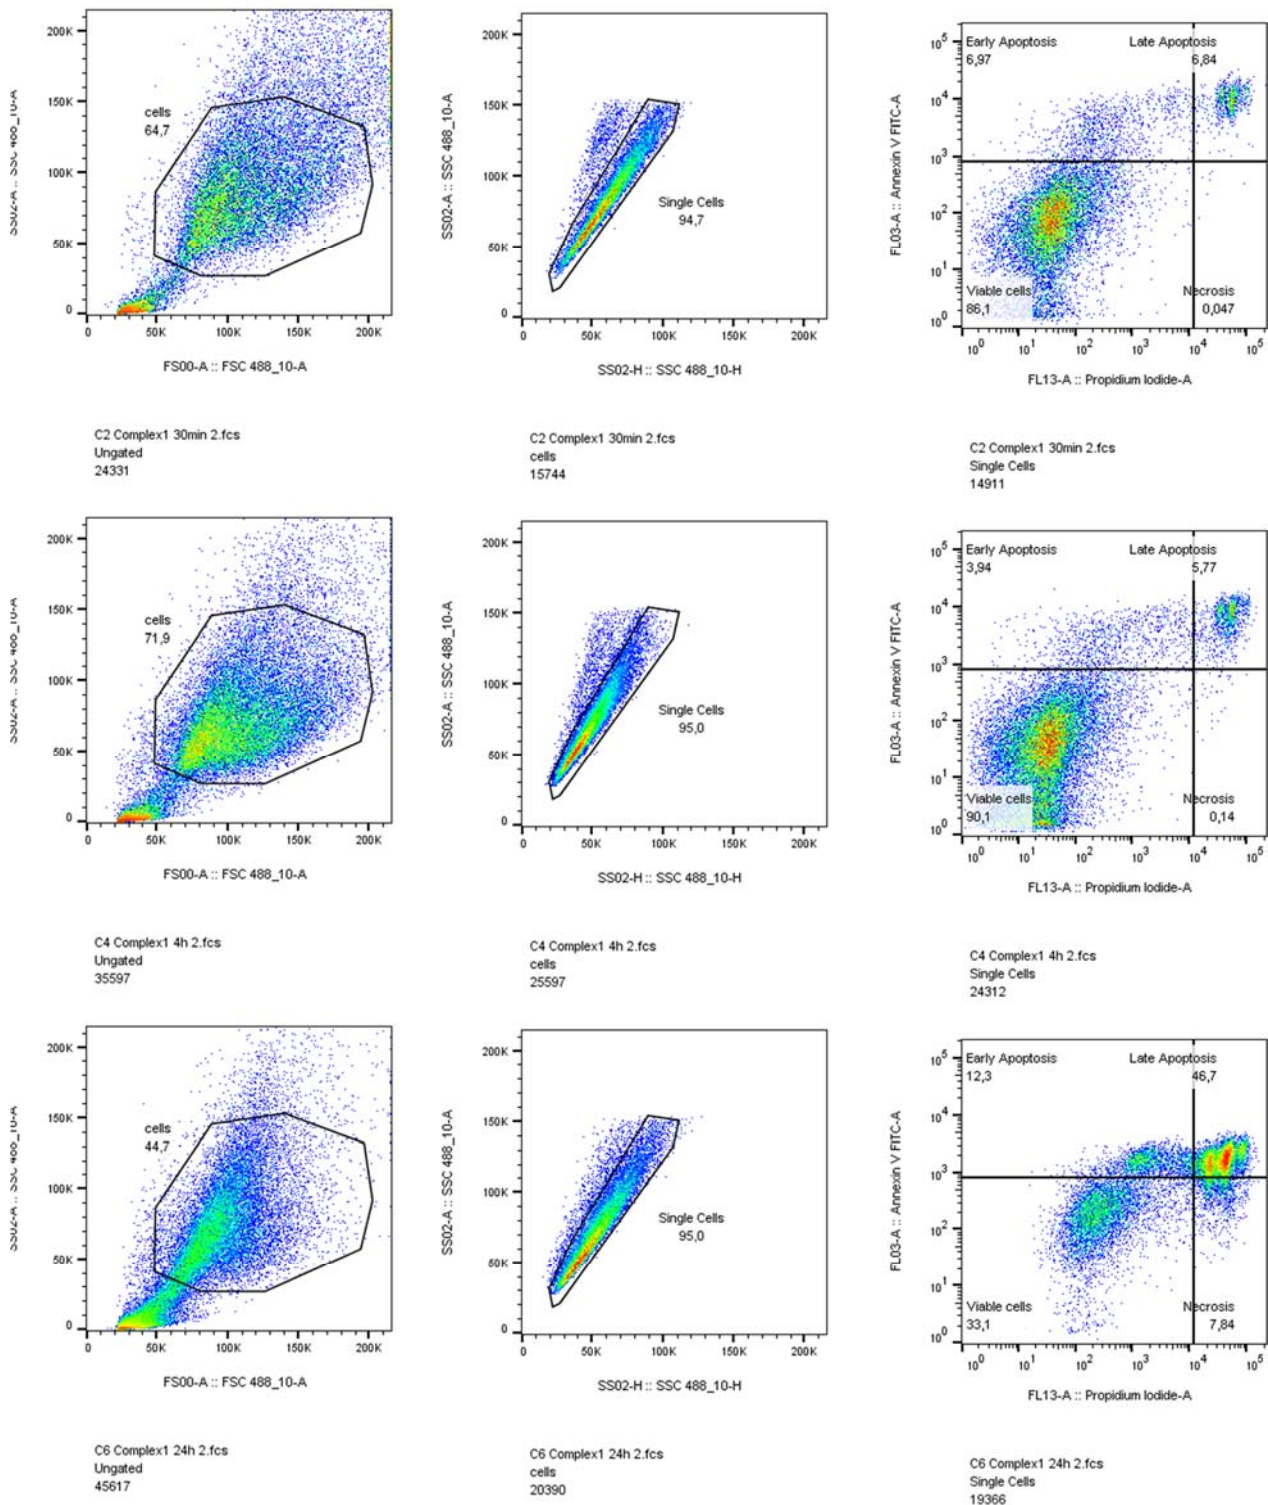

- 16) **Figure S11.** Cellular uptake mechanism of complex **1**. Accumulation of ruthenium in HeLa cells in presence of different inhibitors and conditions: low temperature (4°C), blocked cellular metabolism (2-Deoxy-D-glucose, oligomycin), blocked endocytic pathways (chloroquine or ammonium chloride), blocked cation transporters (tetraethylammonium chloride). Cells were pre-treated with uptake inhibitors and then incubated with **1** (2 h, 5  $\mu$ M). Amounts of ruthenium were measured using ICP-MS.

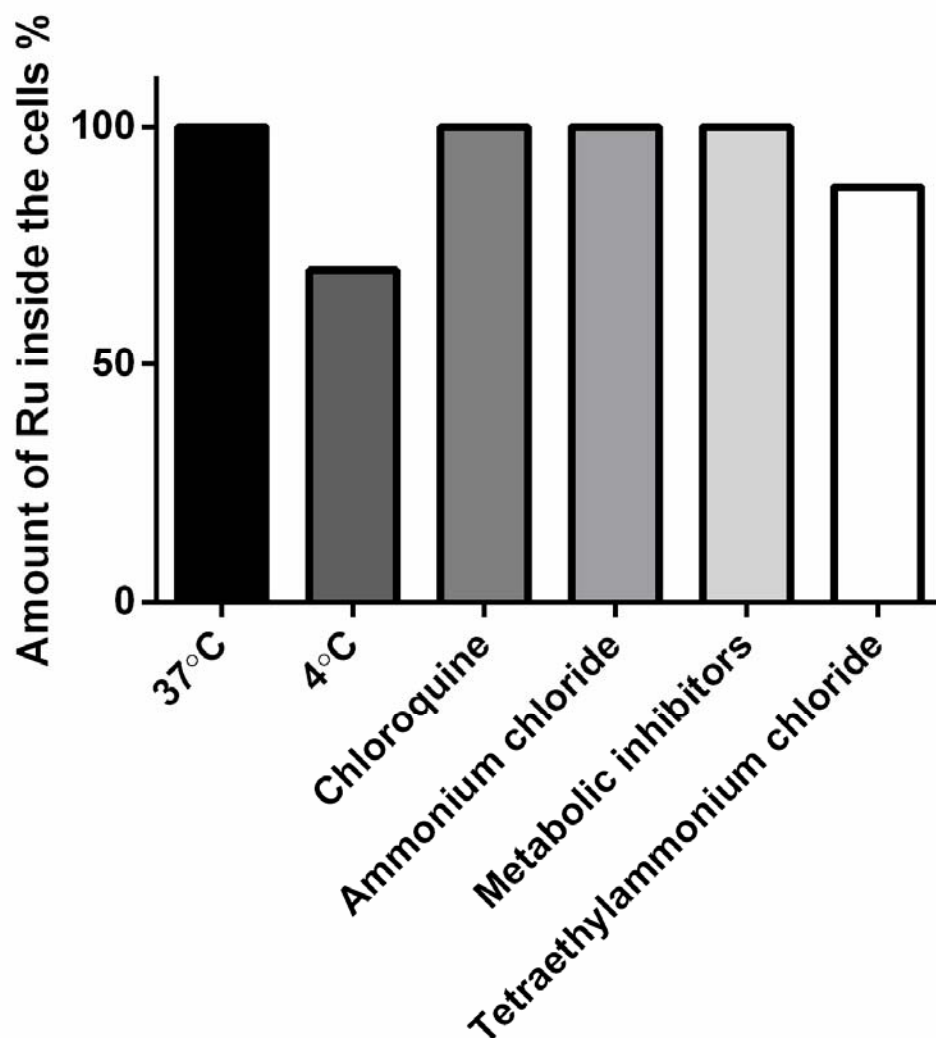



17) **Figure S12.** Oxygen consumption rates and different respiration parameters in HeLa cells alone or after treatment with various test compounds.

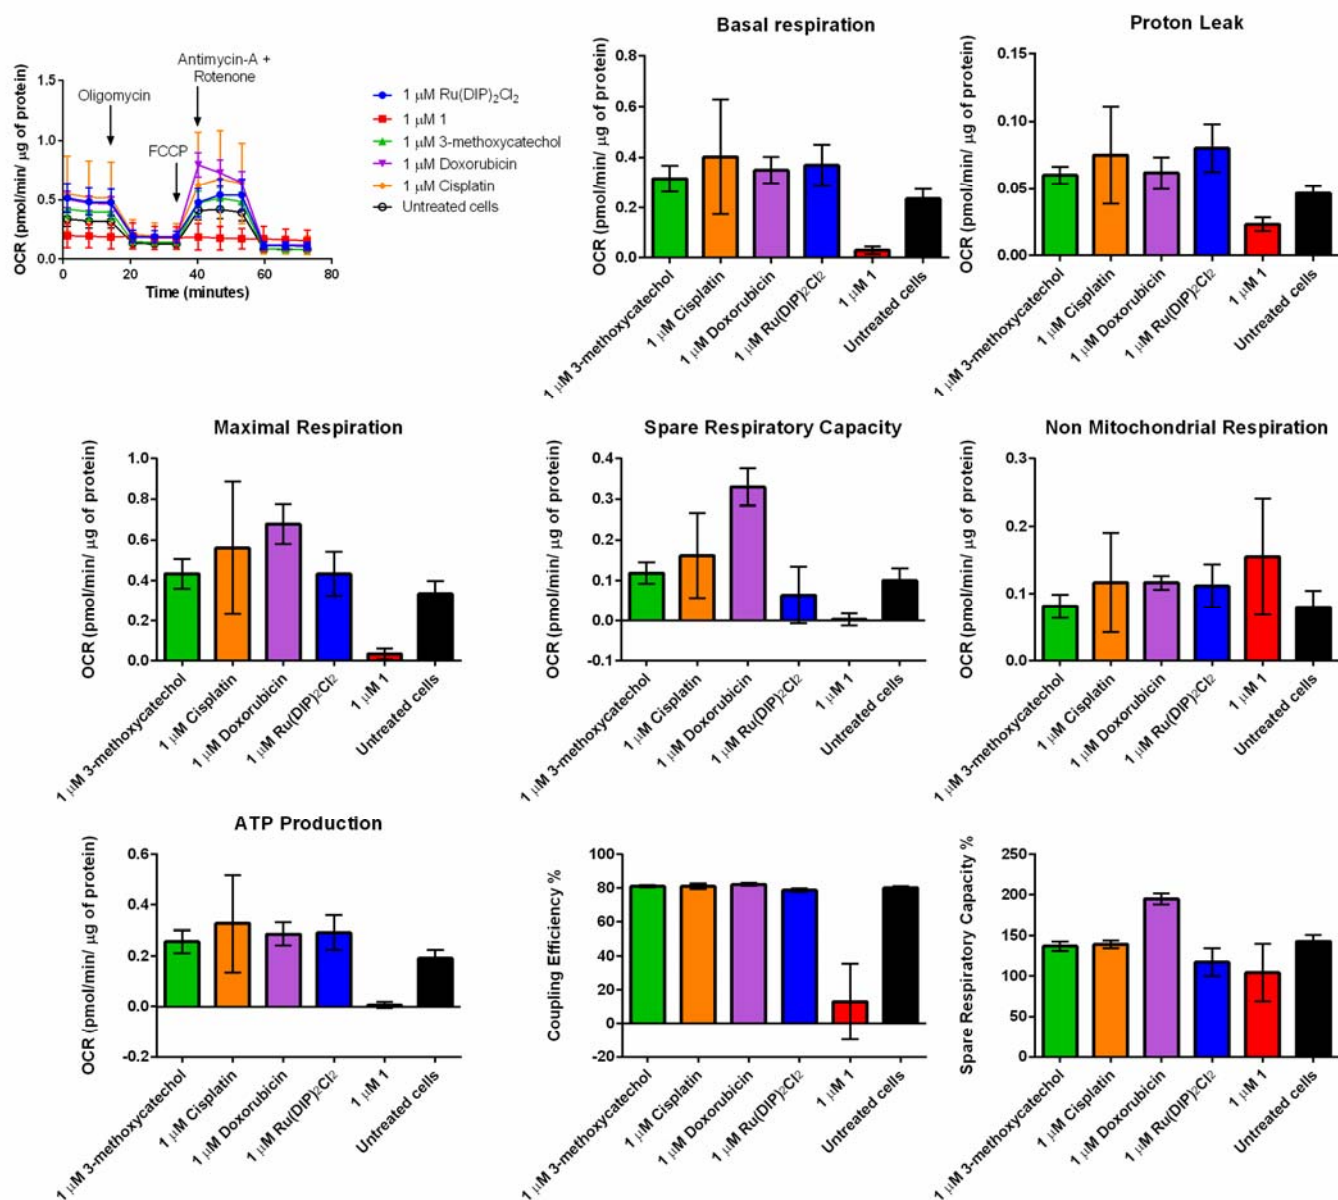

18) **Figure S13.** Extracellular acidification rate and different parameters of glycolysis in HeLa cells alone or after treatment with various test compounds.

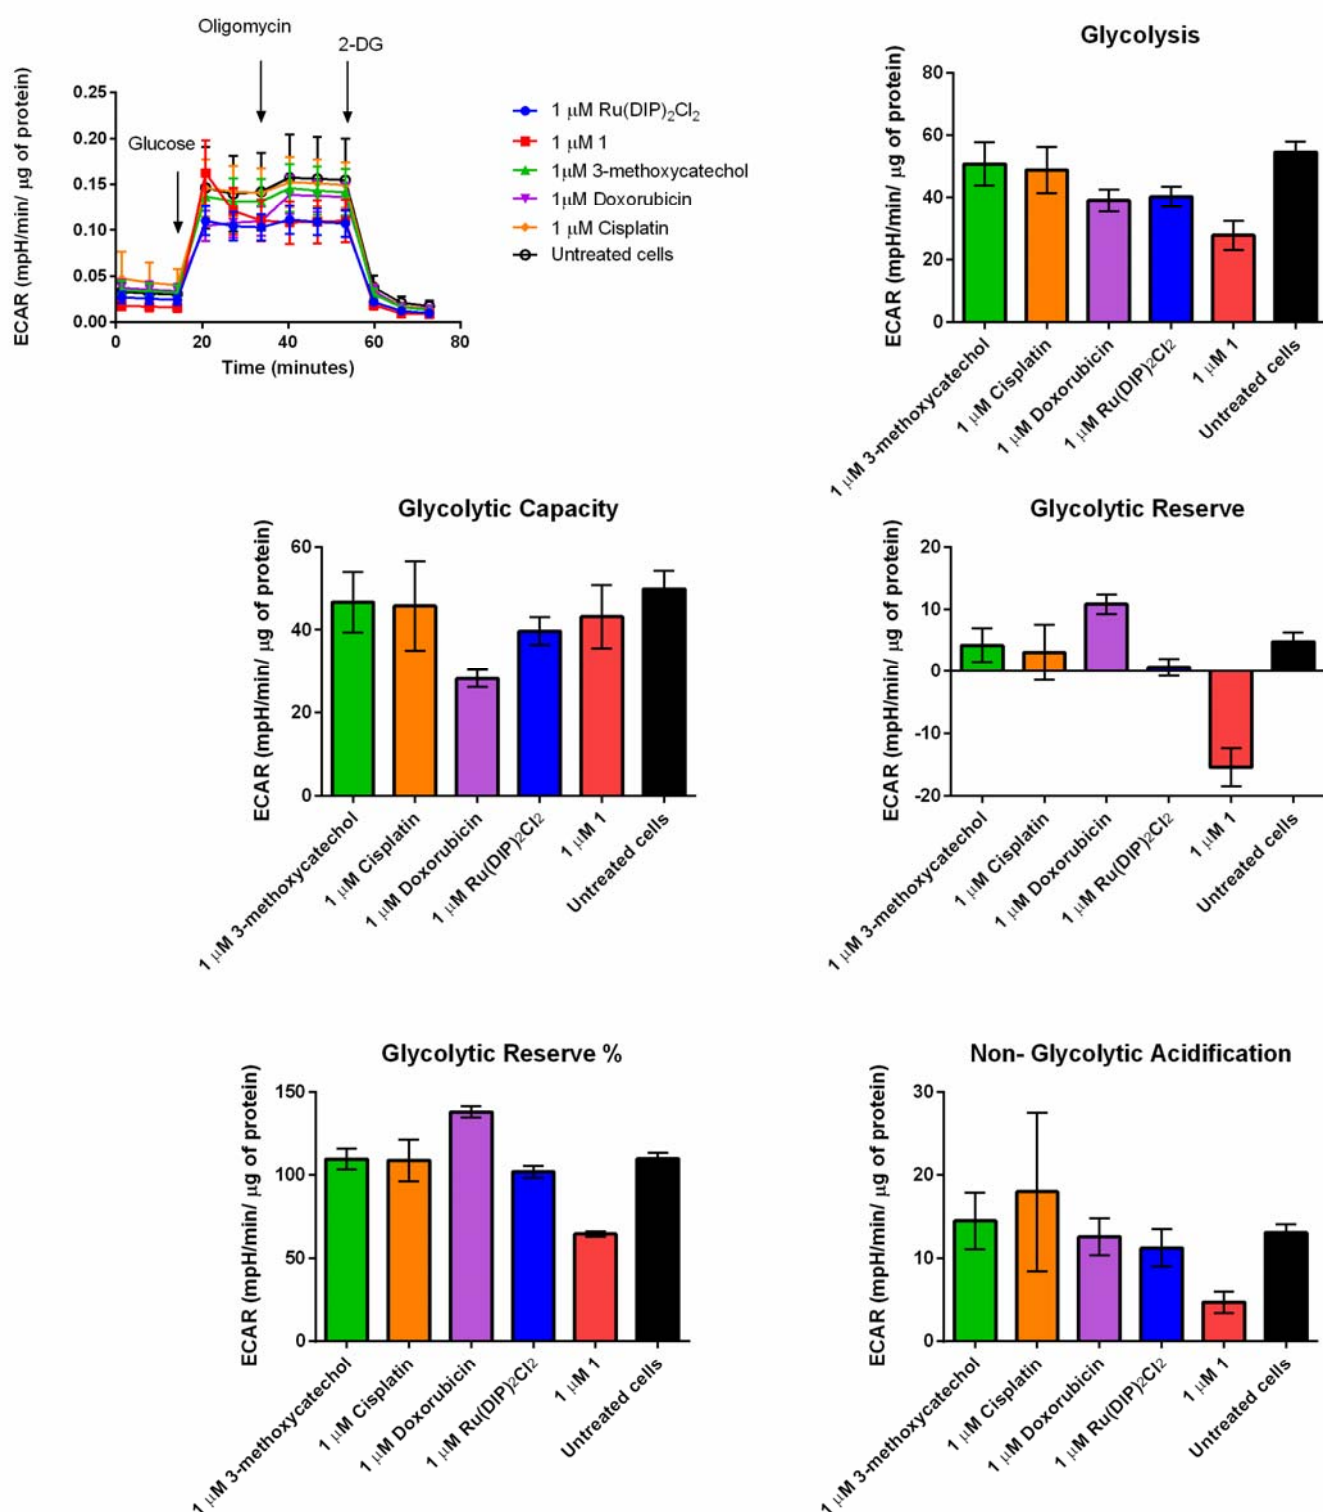

19) **Figure S14.** Fuel flex assay in HeLa cells. Dependency studies were performed by adding the inhibitor for the target pathway in port A and inhibitors for the other two pathways in port B while capacity studies were done using the reverse sequence. UK-5099 (20  $\mu$ M), BPTES (30  $\mu$ M) and etomoxir (40  $\mu$ M) were used as the inhibitors for the fuel pathways run by glucose, glutamine and fatty acids.

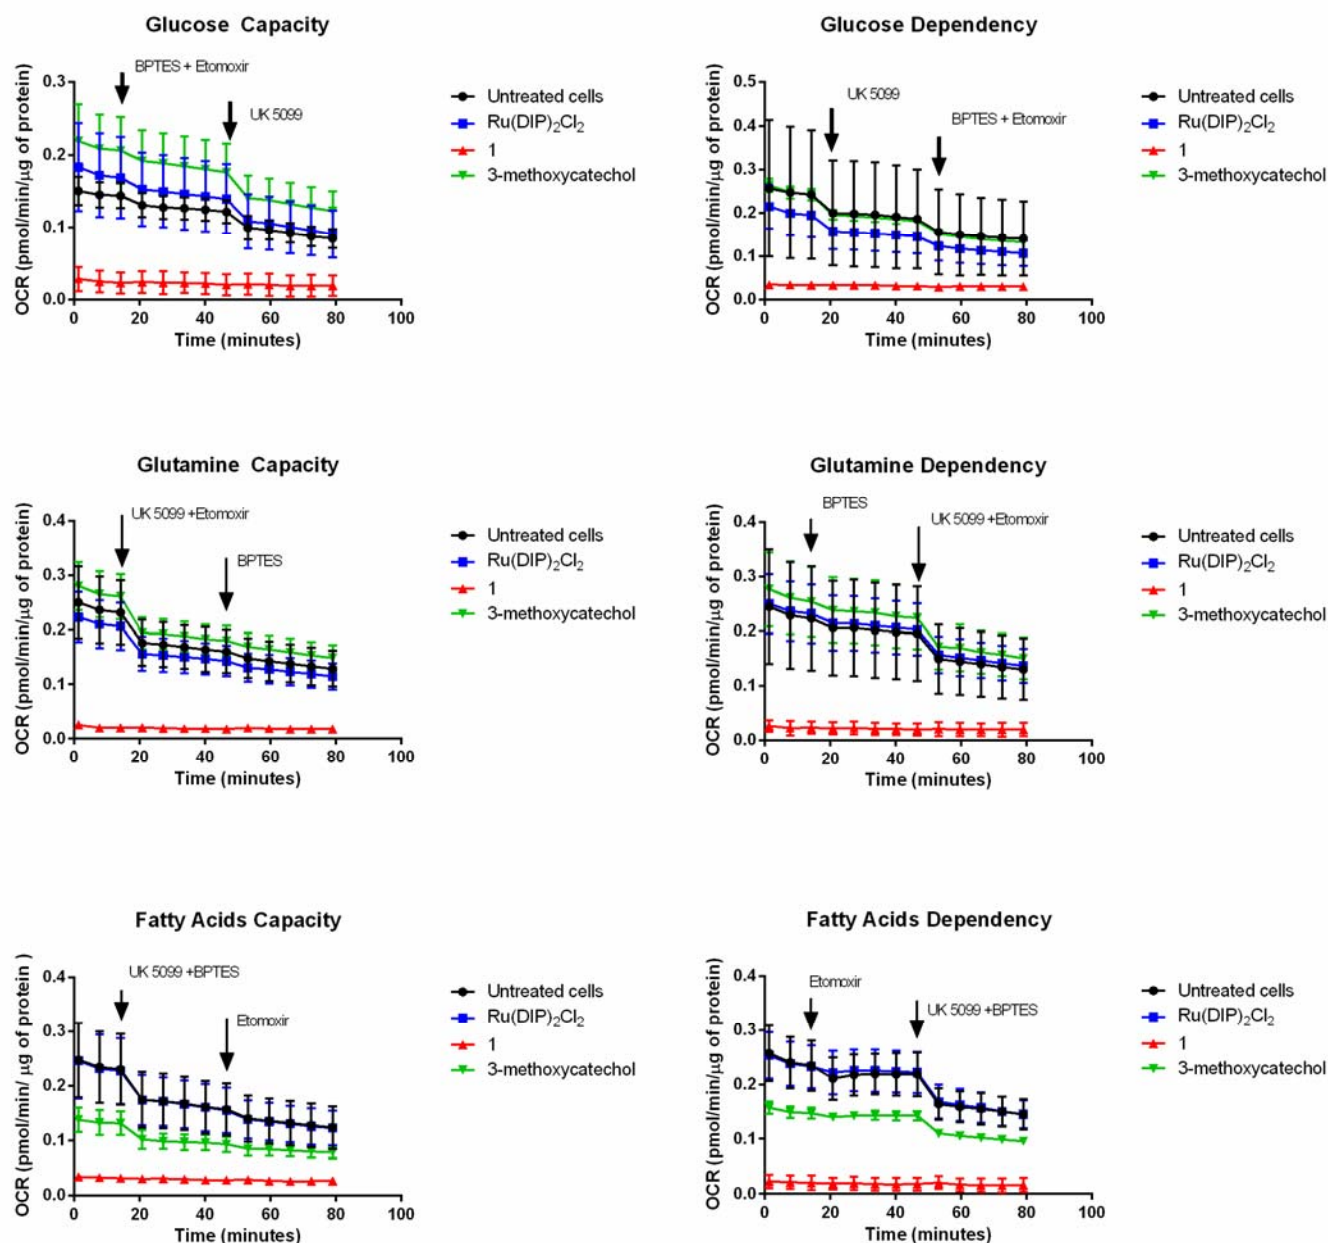

Supplement: Supplementary file 1 [file 22033872]
